1                   **Olig2 and Hes regulatory dynamics during motor neuron**  
2                   **differentiation revealed by single cell transcriptomics**

3  
4  
5  
6  
7  
8  
9   Andreas Sagner<sup>\*1</sup>, Zachary B. Gaber<sup>\*2</sup>, Julien Delile<sup>\*1</sup>, Jennifer H. Kong<sup>2</sup>, David L.  
10   Rousso<sup>2</sup>, Caroline A. Pearson<sup>2</sup>, Steven E. Weicksel<sup>3</sup>, Manuela Melchionda<sup>1</sup>, S. Neda  
11   Mousavy Gharavy<sup>1</sup>, James Briscoe<sup>§,1</sup>, Bennett G. Novitch<sup>§,2,3</sup>

12  
13  
14   \*These authors contributed equally

15  
16                   <sup>1</sup>The Francis Crick Institute, 1 Midland Road, London NW1 1AT, UK

17  
18                   <sup>2</sup>Department of Neurobiology, Eli and Edythe Broad Center for Regenerative  
19   Medicine and Stem Cell Research, David Geffen School of Medicine at UCLA, 610  
20   Charles E Young Dr East, TLSB 3024, Los Angeles, California 90095, USA

21  
22                   <sup>3</sup>Department of Cell and Developmental Biology, University of Michigan Medical  
23   School, Ann Arbor, MI 48109

24  
25  
26   § Correspondence to either J. Briscoe ([james.briscoe@crick.ac.uk](mailto:james.briscoe@crick.ac.uk)) or B. Novitch  
27   ([bnovitch@ucla.edu](mailto:bnovitch@ucla.edu))

28

1 **ABSTRACT** (max 150 words)

2

3 During tissue development, multipotent progenitors differentiate into specific  
4 cell types in characteristic spatial and temporal patterns. We address the  
5 mechanism linking progenitor identity and differentiation rate in the neural  
6 tube, where motor neuron (MN) progenitors differentiate more rapidly than  
7 other progenitors. Using single cell transcriptomics, we define the  
8 transcriptional changes associated with the transition of neural progenitors  
9 into MNs. Reconstruction of gene expression dynamics from these data  
10 indicate a pivotal role for the MN determinant Olig2 just prior to MN  
11 differentiation. Olig2 represses expression of the Notch signaling pathway  
12 effectors Hes1 and Hes5. Olig2 repression of Hes5 appears to be direct, via a  
13 conserved regulatory element within the Hes5 locus that restricts expression  
14 from MN progenitors. These findings reveal a tight coupling between the  
15 regulatory networks that control patterning and neuronal differentiation, and  
16 demonstrate how Olig2 acts as the developmental pacemaker coordinating  
17 the spatial and temporal pattern of MN generation.

## 1 INTRODUCTION

2

3 The orderly development of embryonic tissues relies on gene regulatory  
4 networks that control patterns of gene expression, tissue growth and cell  
5 differentiation (Davidson 2010; Stathopoulos and Levine 2005). Genetic and  
6 molecular studies have identified many of the constituents of these networks  
7 and have begun to define the regulatory hierarchy between them.  
8 Nevertheless, how cell fate assignment is coordinated with proliferation and  
9 differentiation remains poorly understood.

10

11 An experimentally well-characterised tissue that exemplifies this problem is  
12 the vertebrate spinal cord. In ventral regions of the developing spinal cord  
13 proliferating progenitors are exposed to a gradient of Sonic Hedgehog (Shh)  
14 signalling that controls the expression of a set of homeodomain and basic  
15 helix-loop-helix (bHLH) transcription factors (TFs) (Briscoe et al. 2000; Ribes  
16 and Briscoe 2009; Briscoe and Ericson 1999). These TFs form a gene  
17 regulatory network that progressively allocates progenitor identity, dividing the  
18 spinal cord into molecularly discrete domains arrayed along the dorsal-ventral  
19 axis (Balaskas et al. 2012; Cohen et al. 2013). This combinatorial  
20 transcriptional code determines the subtype identity of the post-mitotic  
21 neurons generated by progenitors in each domain, thereby controlling the  
22 position at which MNs and interneurons emerge (Briscoe et al. 2000; Jessell  
23 2000; Lee and Pfaff 2001; Alaynick et al. 2011).

24

25 Among the first neurons to differentiate in the ventral spinal cord are MNs. In  
26 mouse and chick, these are formed over a 2 to 3-day period (Kicheva et al.  
27 2014). During this time, most if not all MN progenitors exit the cell cycle and  
28 differentiate, whereas the adjacent progenitor domains that give rise to  
29 interneurons continue to divide and consequently differentiate at a much  
30 slower pace (Kicheva et al. 2014; Ericson et al. 1992). These differences in  
31 differentiation rate play an important role in the elaboration of spinal cord  
32 pattern and ensure appropriate numbers of MNs are generated. This raises  
33 the question of how the regulatory mechanisms defining MN progenitors  
34 prime these cells to differentiate rapidly.

35

36 The induction and differentiation of MNs are characterized by a series of gene  
37 expression changes. Initially, Shh signaling induces the bHLH protein Olig2,  
38 resulting in the repression of the homeodomain protein *Ir3* and bHLH protein  
39 *Bhlhb5*, normally expressed in neural progenitors (NPs) dorsal to MNs  
40 (Novitsch et al. 2001; Zhou and Anderson 2002; Lu et al. 2002; Skaggs et al.  
41 2011). Ectopic expression of Olig2 represses both *Ir3* and *Bhlhb5*, resulting  
42 in ectopic MN production (Novitsch et al. 2001; Mizuguchi et al. 2001; Skaggs

1 et al. 2011). Conversely, in the absence of *Olig2*, MN generation fails and  
2 instead *lrx3* and *Bhlhb5* expression are maintained and NPs differentiate into  
3 ventral interneurons (Zhou and Anderson 2002; Lu et al. 2002; Takebayashi  
4 et al. 2002; Skaggs et al. 2011).

5  
6 The gene regulatory mechanisms that are responsible for the higher rate of  
7 neurogenesis of MN progenitors compared to other NPs in the spinal cord are  
8 not well understood. Whether *Olig2* functions as an activator or inhibitor of  
9 neurogenesis is unclear. Initial studies indicated that expression of *Olig2*  
10 accelerates cell cycle exit (Novitsch et al. 2001) and the absence of *Olig2*  
11 results in a characteristically slower tempo of neuronal differentiation (Zhou  
12 and Anderson 2002). *Olig2* promotes the expression of the proneural bHLH  
13 TF *Ngn2* and ectopic expression of *Ngn2* causes progenitor cells to exit the  
14 cell cycle to differentiate prematurely into neurons (Novitsch et al. 2001;  
15 Scardigli et al. 2001; Mizuguchi et al. 2001; Bertrand et al. 2002; Lu et al.  
16 2000; Sugimori et al. 2007; Lacomme et al. 2012). These studies also showed  
17 that *Olig2* acts as a transcriptional repressor to promote *Ngn2* expression  
18 (Novitsch et al. 2001; Mizuguchi et al. 2001), implying that *Olig2* promotes  
19 *Ngn2* expression by negatively regulating the expression of *Ngn2* repressors.  
20 Candidate *Ngn2* repressors include members of the Hairy/Enhancer of Split  
21 (*Hes*) family of transcription factors, which act downstream of the Notch  
22 signaling pathway to prevent neuronal differentiation and maintain progenitors  
23 in a dividing, undifferentiated state (Ohtsuka et al. 1999; Shimojo et al. 2011;  
24 Kageyama et al. 2007).

25  
26 Although these studies suggested that *Olig2* promotes motor neurogenesis,  
27 subsequent studies ascribed anti-neurogenic and pro-proliferative functions to  
28 *Olig2* (reviewed in Meijer et al. 2012). These conclusions were based on the  
29 *Olig2*-mediated repression of the MN marker *Hb9* (*Mnx1*) (Lee et al. 2005)  
30 and the cell cycle inhibitor *p21* (Ligon et al. 2007), as well as the ability of  
31 *Olig2* to form heterodimers with *Ngn2*, which inhibit neurogenic activity (Lee et  
32 al. 2005), and the capacity of *Olig2* to oppose *p53* function (Mehta et al.  
33 2011). Furthermore, addition of *Olig2* to TF reprogramming cocktails inhibits  
34 reprogramming of fibroblasts to MNs (Son et al. 2011), supporting the idea  
35 that *Olig2* interferes with the differentiation of MNs. Thus, although the genetic  
36 evidence establishes *Olig2* as a key determinant of MN identity, the  
37 apparently contradictory findings leave unexplained how *Olig2* coordinates  
38 specification of neuronal identity while determining the rate of differentiation.

39  
40 Single cell RNA sequencing (scRNA-seq) is emerging as a novel and  
41 powerful technology to identify distinct cell types in complex mixtures and to  
42 define developmental trajectories during differentiation (Scialdone et al. 2016;

1 Treutlein et al. 2016; Setty et al. 2016; Trapnell et al. 2014; Shin et al. 2015).  
2 Here we take advantage of an *in vitro* model that allows the generation of  
3 ventral spinal cord cell types from embryonic stem cells (ESCs) to perform  
4 scRNA-seq analysis of developing NPs (Gouti et al. 2014). We use these data  
5 to reconstruct and validate the differentiation trajectory of MN progenitors, and  
6 to infer the gene regulatory mechanisms by which Olig2 promotes MN  
7 differentiation. Both *in vivo* and *in vitro* cells commit to MN differentiation  
8 asynchronously. This limits the temporal resolution of conventional gene  
9 expression assays, potentially obscuring details of the sequence of events  
10 during MN differentiation. Here we develop a method to reconstruct the  
11 differentiation trajectory from scSEQ data that provides much greater  
12 temporal resolution of the transcriptional dynamics during MN differentiation  
13 than previously available. This approach identified a sequence of distinct  
14 phases in MN differentiation, including two distinct Olig2 expression states. An  
15 initial Olig2<sup>LOW</sup> state, during which Hes1 expression decreases and Olig2 is  
16 coexpressed with Hes5, and a subsequent Olig2<sup>HIGH</sup> state in which high levels  
17 of Olig2 promote differentiation by repressing Hes5, thereby indirectly  
18 inducing Ngn2. We validate this two-phase model using quantitative image  
19 analysis of a fluorescent Olig2 reporter and provide *in vitro* and *in vivo*  
20 evidence that Olig2 acts directly on *Hes* genes to promote cell cycle exit and  
21 neurogenesis in the MN progenitor domain (pMN domain). Together the data  
22 provide a comprehensive view of the regulatory network that controls the  
23 specification of MN progenitors and identify a molecular mechanism  
24 coordinating the specification of positional identity with differentiation.

25

## 26 RESULTS

27

### 28 *In vitro* generation of Motor Neuron and V3 progenitors

29 To define the sequence of events that lead to the generation of somatic MNs,  
30 we took advantage of ESCs, which can be directed to differentiate into spinal  
31 NPs *in vitro* (Gouti et al. 2014). This method relies on the exposure of ESCs,  
32 cultured as a monolayer, to a brief pulse of Wnt signalling prior to neural  
33 induction (Fig 1A). This induces the caudalizing TFs Cdx1,2,4 (Gouti et al.  
34 2014). Subsequently, removal of Wnt signalling and concomitant exposure to  
35 retinoic acid (RA) and the Shh signalling agonist SAG results in the  
36 generation of NPs expressing progenitor markers characteristic for the ventral  
37 spinal cord such as Olig2 and Nkx2.2 (Fig 1B) and MNs expressing post-  
38 mitotic markers including Islet1 (Isl1), Mnx1 and neuronal class III beta-tubulin  
39 (Tubb3) (Fig 1B,C and Fig S1A). These NPs express initially *Hoxb1* and later  
40 *Hoxb9* (Fig S1B) and differentiate into *Hoxc6*-positive MNs, characteristic of  
41 forelimb level spinal cord MNs (Fig S1B,C) (Dasen et al. 2003; Philippidou  
42 and Dasen 2013; Stifani 2014; Gouti et al. 2014).

1

2 *In vivo* NPs respond to both the levels and duration of Shh signalling by  
3 transitioning through a succession of progressively more ventral gene  
4 expression states (Fig S2A) (Chamberlain et al. 2008; Dessaud et al. 2010;  
5 Balaskas et al. 2012; Jeong and McMahon 2005). To further characterize the  
6 behaviour of ESCs derived NPs *in vitro*, we first asked whether treatment of  
7 NPs with increasing concentrations of SAG (0, 10, 50, 100, 500, and 1000 nM  
8 SAG) leads to progressively more ventral cell fates. Generation of NPs in the  
9 absence of SAG resulted in the expression of *Pax3*, *Pax7* and *Dbx1*,  
10 indicative of a dorsal and intermediate NP identity (Fig S2B). Treatment with  
11 10 nM SAG resulted in the down-regulation of these genes and induction of  
12 the pan-ventral marker *Nkx6.1* (Fig S2B,C). Between 50 – 500 nM SAG,  
13 expression of the MN progenitor marker *Olig2* was observed, while treatment  
14 with 500 and 1000 nM SAG resulted in further ventralization and induction of  
15 the p3 determinant *Nkx2.2* (Fig S2B,D). Induction of ventral markers  
16 coincided with the successive down-regulation of *Irx3* and *Pax6*, consistent  
17 with their *in vivo* expression patterns (Fig S2B,D). Thus, *in vitro* NPs respond  
18 to different levels of Shh pathway activity by induction of the same progenitor  
19 markers that demarcate NP domains in the embryonic ventral spinal cord.

20

21 We next tested whether *in vitro* NPs also displayed progressive ventralization  
22 in response to increasing exposure durations to a constant concentration of  
23 SAG. To this end, we treated cells with 500 nM SAG from day 3 and  
24 quantified gene expression by RT-qPCR over the course of the next few days.  
25 At day 3.5, 12 hours after the cessation of Wnt signalling and addition of RA  
26 and SAG, cells expressed *Sox1*, *Pax6* and *Irx3*, consistent with the acquisition  
27 of NP identity (Fig 1B,D). The absence of ventral markers at this stage  
28 indicates that these NPs initially adopt a dorsal/intermediate positional identity  
29 (Jeong and McMahon 2005; Dessaud et al. 2010). By day 4, the expression of  
30 *Pax6* and *Irx3* were maintained and *Nkx6.1*, which is expressed broadly in the  
31 ventral third of the neural tube, was induced (Fig 1B,D). Within 12h of this  
32 time point, *Olig2* expression commenced and both *Pax6* and *Irx3* declined  
33 (Fig 1B-D). Over the next 48h, *Pax6* and *Irx3* were further repressed, *Nkx2.2*  
34 increased and *Olig2* expression began to decline (Fig 1B-D). The order in  
35 which these genes were activated and repressed closely resembles the  
36 temporal-spatial sequence of progenitor domains in the embryonic spinal cord  
37 (Dessaud et al. 2010; Balaskas et al. 2012; Jeong and McMahon 2005), and  
38 suggests that under these conditions MN progenitors are generated *in vitro*  
39 between day 4.5 and ~day 6.

40

41 Consistent with the generation of MN progenitors *in vitro*, *Ngn2* was induced  
42 following *Olig2* (Fig 1E); and with a ~12 hours delay we observed markers

1 characteristic of post-mitotic MNs, including *Isl1* and *Tubb3* (Fig 1C,E).  
2 Concomitantly, the expression of the NP marker *Sox1* declined (Fig 1C,E).  
3 Taken together, these data indicate that this method of directing ESC  
4 differentiation recapitulates *in vivo* dynamics of neural tube patterning  
5 between approximately e8.5 and e10.5 and results in the production of MN  
6 progenitors and MNs characteristic of those normally found at forelimb levels.

7

### 8 **Single cell transcriptome analysis of *in vitro* NPs**

9 We reasoned that analysing the transcriptome of individual cells would  
10 provide insight into the transitions in gene expression associated with the  
11 differentiation of MNs and allow the construction of a detailed developmental  
12 timeline. We therefore performed scRNA-seq analysis using the Fluidigm-C1  
13 platform on 236 cells isolated from day 4 to day 6 of the differentiation  
14 protocol. After applying quality filters (see Analytical Supplement)  
15 transcriptomes of 202 cells were retained for subsequent analysis (25 cells  
16 from day 4, 68 cells from day 5 and 109 cells from day 6). To identify the cell  
17 states present in the dataset, we established a data driven analysis pipeline  
18 based on hierarchical clustering and association of gene modules with  
19 specific GO terms (see Analytical Supplement). In brief, the data were first  
20 filtered by removing genes that did not exceed a Spearman correlation of  
21  $r > 0.4$  with at least two other genes (retaining 2287 genes). A combination of  
22 hierarchical clustering and automated selection criteria identified 22 gene  
23 modules that represent distinct patterns of gene expression across the  
24 dataset (see Analytical Supplement and Supplementary File 1). Further  
25 functional characterization of these gene modules based on GO terms  
26 resulted in the identification of 10 gene modules that were sufficient to assign  
27 a cell type classification to each cell in the dataset using hierarchical  
28 clustering (Fig S3A and Supplementary File 2). Cells in these clusters showed  
29 comparable read counts and number of expressed genes per cell, suggesting  
30 that these properties did not bias the clustering (Fig S3B).

31

32 Consistent with our previous finding that the spinal NPs generated by  
33 differentiation of ESCs share a developmental lineage with trunk mesoderm  
34 (Gouti et al. 2014), we observed two mesodermal cell populations in our  
35 dataset: paraxial presomitic mesoderm characterized by the expression of  
36 *Meox1* and *Foxc1*, and a vascular endothelial population expressing *Dll4* and  
37 *Cdh5* (Fig S3A). The remaining cell clusters corresponded to different stages  
38 of NPs and differentiating MNs (Fig 2A). Five gene modules were associated  
39 with these cells (comprising 306 genes; see Supplementary File 1). Module 1  
40 was enriched for genes upregulated in early NPs, including the TF *Irx3*.  
41 Module 2 contained genes expressed in MN progenitors, including the ventral  
42 progenitor markers *Olig2* and *Nkx6.1*, and the neural-specific POU TF *Pou3f2*

1 (aka Brn-2). Module 3 comprised a set of genes transiently expressed in MNs  
2 as they differentiate, such as the bHLH TFs *Ngn2*, *Neurod1*, *Neurod4* and  
3 *Hes6*, the homeodomain TFs *Isl1* and *Lhx3*, and the Notch ligand *Dll1*.  
4 Modules 4 and 5 revealed two successive waves of neuronal gene induction.  
5 Module 4 contained genes induced early in differentiated MNs such as *Tubb3*,  
6 the RNA-binding protein *Elavl3* (aka *HuC*) and the SoxC TF *Sox4*, while  
7 Module 5 consisted of genes characteristic of more mature MNs, represented  
8 by *Chat* (*Choline acetyltransferase*) and the TFs *Isl2* and *Onecut1* (Velasco et  
9 al. 2016; Rhee et al. 2016; Thaler et al. 2004; Tanabe et al. 1998).

10  
11 Whereas the five cell clusters defined by these modules represented a  
12 progressive shift of cell states from early progenitor cells to MNs, the  
13 remaining cell cluster exhibited a divergent gene expression signature. In this  
14 cluster, many genes contained in Modules 1 and 2 were downregulated but  
15 neuronal gene expression was not increased. This cluster exclusively  
16 consisted of day 6 cells (Fig 2A). *Nkx2.2* could be detected in some cells of  
17 this cluster (Fig S3C), suggesting that it was comprised of cells progressing  
18 from a pMN to a more ventral p3 identity. Further differential gene expression  
19 analysis on this population identified *Fatty-acid binding protein 7* (*Fabp7*) as  
20 enriched in these cells (Fig S3C). *Fabp7* levels are markedly upregulated in  
21 p3 progenitors *in vitro* and at cervical and brachial levels in embryonic spinal  
22 cords at e10.5 (Fig S3D). We therefore conclude that this cluster contains  
23 cells progressing from MN to p3 progenitors. Taken together, this suggests  
24 our scRNA-seq analysis identifies cells along the MN developmental timeline  
25 and partitions these into specific cell types from early NPs to post-mitotic MNs  
26 and p3 progenitors.

27  
28 We next asked whether it was possible to reconstruct the developmental  
29 timeline from the transcriptome data. For this we used the 306 genes  
30 contained in the five neural gene modules to visualize the developmental  
31 trajectory as a pseudo-temporal ordering derived from a consensus of a large  
32 number of randomized minimum spanning trees (see Analytical Supplement).  
33 The resulting cell graph represents the predicted developmental order of cells  
34 based on their transcriptome profile and hence differentiation state (Fig 2B).  
35 Strikingly, the five previously characterized cell clusters were ordered on the  
36 cell state graphs as expected from the characterization of their gene  
37 expression profile (Fig 2C). The graph revealed developmental trajectories  
38 originating from *Irx3* expressing early NPs to MN progenitors characterized by  
39 *Olig2* expression (Fig 2C). These progenitors then differentiated into MNs via  
40 the sequential expression of *Ngn2*, *Lhx3*, *Isl1* and *Chat* (Fig 2C), or into p3  
41 progenitors characterized by *Nkx2.2* and *Fabp7* expression (Fig S3C). To  
42 investigate these trajectories in more detail we focused on the developmental



1 trajectory leading from NPs to MNs. To represent changes in gene expression  
2 in an unbiased manner, we reconstructed the average gene expression  
3 program along pseudotime from the 9000 shortest paths connecting *Irx3*  
4 expressing progenitor cells to differentiated MNs on the cell state graph  
5 (starred cells in Fig 2B, see Analytical Supplement). Each individual path was  
6 resampled to a constant length of 41 pseudotime points (Fig 2D), allowing  
7 statistical measurements along the developmental timelines. The outcome  
8 was predicted gene expression dynamics during MN differentiation

9

### 10 **Characterization of transcriptional changes during MN differentiation.**

11 As a first validation, we asked if the pseudo-temporal ordering reproduced the  
12 temporal sequence of well-characterized gene expression changes that lead  
13 to MN differentiation. The inferred trajectory correctly predicted the induction  
14 sequence of homeodomain and bHLH TFs *Irx3*, *Pax6*, *Nkx6.1*, and *Olig2*  
15 involved in ventral patterning of the spinal cord (Fig 2E) (Dessaud et al. 2010;  
16 Jeong and McMahon 2005; Chamberlain et al. 2008). Next, we focused on  
17 the transition from progenitors to MNs. As expected, this transition was  
18 associated with the transient expression of *Ngn2*, *Neurod4* and *Lhx3*, followed  
19 by the expression of MN markers including *Isl1/2*, *Tubb3* and *Chat* (Fig 2E).  
20 To assess the robustness of these gene expression dynamics, we utilized a  
21 bootstrapping approach to ask how dependent these are on individual cells  
22 with particular gene expression values (see Analytical Supplement). A total of  
23 a 1000 bootstrapped datasets were constructed by randomly drawing cells,  
24 with replacement, while maintaining original sample size. Then expression  
25 profiles were calculated for each gene in each replicate (Fig S4). To  
26 statistically quantify their robustness, we asked how well these profiles were  
27 correlated between each pair of replicates (see Analytical Supplement). This  
28 analysis revealed a mean Spearman correlation value greater than 0.85 for  
29 most genes (Fig S4). This suggests that the observed gene expression  
30 dynamics do not depend on the levels of gene expression in specific cells  
31 along the pseudo-temporal trajectory and are a robust representation of the  
32 gene expression dynamics during MN differentiation.

33

34 The process of cell development has been characterised as a series of  
35 metastable states defined by a relatively homogenous gene expression  
36 program connected by stereotypic transitions (Moris et al. 2016). During these  
37 transitions coordinated changes in gene expression occur, often induced in  
38 response to a change in signalling. We reasoned metastable states and  
39 transition phases should be evident in the pseudo-temporal ordering.  
40 Quantifying the variation in gene expression by averaging the normalized  
41 derivative of the most dispersed genes' expression profiles identified these  
42 phases (Fig 2D). The three metastable states in which gene expression

1 changes were relatively modest corresponded to early NPs, MN progenitors  
2 and MNs. Linking these states were transitions characterized by an increased  
3 change in the global gene expression profile. The first transition corresponded  
4 to the switch from *Irx3* expressing intermediate progenitors to *Olig2*  
5 expressing MN progenitors (Fig 2E), while the second captured the transition  
6 of progenitors to post-mitotic neurons (Fig 2E).

7  
8 We asked whether signatures of signalling pathways driving these transitions  
9 could be identified. To this end, we examined the induction and  
10 disappearance of canonical target genes for different signalling pathways. As  
11 expected, the transition from *Irx3* to *Olig2* coincided with the induction of well-  
12 known Shh target genes *Ptch2*, *Hhip1* and *Gli1*, consistent with Shh signalling  
13 mediating this transition (Fig S3E). By contrast, the second transition was  
14 accompanied by a loss of Notch signalling, marked by the disappearance of  
15 *Hes1/5* and induction of markers causing or characteristic of a loss of Notch  
16 signalling, including *Numb1*, *Hes6*, *Dll1*, *Ngn2* and *Neurod4* (Fig 2E and Fig  
17 S3F). Strikingly, the beginning of this stage coincided with peak expression  
18 levels of *Olig2* (Fig 2E,F). This finding raised the possibility that high levels of  
19 *Olig2* promote neurogenesis, potentially by directly regulating levels of Notch  
20 signalling. In summary, the characterization of changes in the transcriptional  
21 profile in pseudotime identified distinct metastable cell states and the  
22 signalling pathways associated with the transitions between these states.

### 23 24 ***In vitro* and *in vivo* validation of the pseudo-temporal ordering**

25 To extend this approach and validate the predicted timeline we asked whether  
26 the data was sufficient to capture fine-grained temporal information that could  
27 be tested experimentally. Examination of the transition from *Olig2* expressing  
28 progenitors to *Isl1* expressing MNs predicted the transient expression of first  
29 *Ngn2*, then *Lhx3* and finally *Isl1* (Fig 2C,E). This is consistent with *in vivo* data  
30 indicating that *Lhx3* precedes the expression of other MN markers in the  
31 spinal cord (Arber et al. 1999; Tanabe et al. 1998) and a similar sequence of  
32 gene expression has been described in an *in vitro* MN differentiation protocol  
33 based on embryoid bodies (Rhee et al. 2016; Tan et al. 2016). To confirm this  
34 sequence of events *in vitro* we assayed *Olig2*, *Ngn2*, *Lhx3*, and *Isl1* on day 6  
35 of differentiation and quantified the levels of expression in individual nuclei  
36 (Fig S5A). Comparison of *Olig2* and *Isl1* levels in individual nuclei revealed a  
37 clear trajectory from *Olig2*-positive, *Isl1*-negative NPs to *Isl1*-positive, *Olig2*-  
38 negative MNs. Overlaying the levels of *Ngn2* and *Lhx3*, in the same cells,  
39 revealed that both proteins are only transiently expressed along the  
40 differentiation trajectory (Fig S5B,C). To confirm the absence of *Lhx3* in more  
41 mature MNs, we assayed *Lhx3*, *Isl1* and the pan-neuronal marker *Tubb3* (Fig  
42 S5D). Consistent with the pseudo-temporal ordering, most *Tubb3* expressing

1 cells displayed high levels of *Isl1* expression but only low levels of *Lhx3*, while  
2 cells with high levels of *Lhx3* did not express high levels of *Isl1* or *Tubb3* (Fig  
3 S5D). In summary, these two observations confirm the predictions from the  
4 pseudo-temporal ordering and validate the approach for predicting fine-  
5 grained changes in the transcriptional program of cells along the  
6 differentiation trajectory to MNs.

7  
8 To further test the reliability of the timeline and demonstrate the validity of the  
9 approach for understanding MN differentiation dynamics, we asked if we  
10 could predict novel genes involved in MN formation. To this end, we selected  
11 genes positively correlated with *Olig2* and *Ngn2* (Fig S5E,F). One gene with a  
12 particularly strong relationship was *Zbtb18* (also known as *RP58* or *Zfp238*).  
13 *Zbtb18* is a zinc-finger TF with a BTB domain. In the brain its loss causes  
14 microcephaly and decreased neuronal and increased glial differentiation  
15 (Xiang et al. 2011). Less is known about its expression pattern and role in the  
16 spinal cord, although *in situ* hybridisation analyses have suggested it is  
17 predominantly expressed in ventral progenitors (Oosterveen et al. 2013). As  
18 expected, when we assayed *Zbtb18* using immunohistochemistry, it was  
19 expressed in cells that also expressed *Olig2* and *Ngn2* (Fig S5G-I).  
20 Consistent with this, its expression was detected *in vivo* in the pMN domain at  
21 e9.5 in cells that also expressed high levels of *Olig2* and *Ngn2* (Fig S5J). At  
22 e10.5, it was still predominantly expressed ventrally, although no longer  
23 confined to the pMN domain (Fig S5K). In summary, this expression pattern  
24 further validates the computationally reconstructed MN differentiation timeline.

### 25 26 **Olig2 expression increases as cells commit to MN differentiation**

27 The MN differentiation timeline indicated that *Olig2* expression was induced  
28 as *Irx3* was repressed (Fig 2E), consistent with the cross repressive  
29 interactions between these two genes (Novitch et al. 2001; Mizuguchi et al.  
30 2001; Chen et al. 2011). This transition demarcated the transition from the  
31 first to the second phase identified in the MN timeline. It was noticeable that  
32 the expression of *Olig2* appeared biphasic with a marked increase in levels of  
33 *Olig2*, which coincided with the transition from the second to the third phase.  
34 Moreover, this transition corresponded to the induction of *Ngn2*. This  
35 predicted that *Olig2* levels peak at the onset of differentiation before being  
36 downregulated as MN identity is elaborated (Fig 2E). To test this prediction,  
37 we first examined the levels of *Olig2* and *Ngn2* in the neural tube of e9.5 and  
38 e10.5 embryos, during the period of MN production (Fig 3A-D"). Consistent  
39 with previous studies, we found that at both stages a proportion of *Olig2*  
40 expressing cells also expressed *Ngn2*, while a much lower proportion of cells  
41 expressed *Ngn2* outside the pMN domain (Mizuguchi et al. 2001; Scardigli et  
42 al. 2001; Novitch et al. 2001). To test if the levels of *Olig2* expression varied in

1 the way predicted by the scRNA-seq data, we quantified levels of Olig2, Ngn2  
2 and the MN marker Mnx1 in nuclei of the pMN domain (Fig 3E-H). This  
3 revealed a striking correlation between Olig2 and Ngn2 protein levels in  
4 individual cells throughout the pMN domain (Fig 3E,G). Moreover, cells  
5 expressing high levels of Olig2 and Ngn2 were differentiating into MNs as  
6 measured by the induction of Mnx1 (Fig 3H). This quantification also indicated  
7 that Olig2 protein persisted longer than Ngn2 in MNs, as cells co-expressing  
8 high levels of Olig2 and Mnx1, but not Ngn2, were observed (Fig 3H). Taken  
9 together, these data suggest that high levels of Olig2 correspond to the  
10 induction of Ngn2 and the onset of neurogenesis within the pMN domain.

11

12 These data prompted us to test directly whether progenitors that expressed  
13 high levels of Olig2 were committed to MN differentiation. Since endogenous  
14 Olig2 protein disappears rapidly from differentiated MNs, we took advantage  
15 of an ESC line in which we fused the fluorescent protein mKate2 to the C-  
16 terminus of endogenous Olig2 via a self-cleaving peptide (Fig 4A) (Shcherbo  
17 et al. 2009; Szymczak et al. 2004). In these cells, the expression of mKate2  
18 provides a readout of Olig2 levels but the increased stability of fluorescent  
19 protein offers a way to mark the progeny of Olig2 expressing cells and  
20 estimate Olig2 levels in the progenitor. Control ESC differentiations indicated  
21 that Olig2 expression dynamics, protein levels and MN formation were similar  
22 in cells containing the engineered or wild-type *Olig2* allele (Fig 4B and Fig  
23 S6A-C). Quantification of the mKate2 and Olig2 protein levels in individual  
24 nuclei revealed a positive correlation in most cells (Fig 4C-C",G and Fig S6D-  
25 F). However, we noted a cohort of cells with much higher levels of mKate2  
26 relative to Olig2. Assaying *Isl1/2* expression revealed that these cells were  
27 MNs (Fig 4D-D"). Consistent with this, high levels of *Isl1/2* and *Tubb3*  
28 expression were only detected in cells with high levels of mKate2 (Fig 4H and  
29 Fig S6A-C). Moreover, mKate2 levels negatively correlated with levels of the  
30 NP marker *Sox1* (Fig 4E-E",I). Thus, MNs indeed progress through a distinct  
31  $Olig2^{HIGH}$  state as they exit from the NP state.

32

33 To address whether the transient upregulation of Olig2 expression was  
34 specific for the transition from pMN cells to MNs, we quantified levels of  
35 mKate2 in *Nkx2.2*-expressing p3 progenitors (Fig 4F-F"). During development  
36 these progenitors transit through an Olig2-expressing pMN intermediate state  
37 before losing Olig2 expression and inducing *Nkx2.2* (Chamberlain et al. 2008;  
38 Dessaud et al. 2010, 2007). In contrast to the positive correlation between  
39 *Isl1/2* and mKate2 (Fig 4H), cells expressing high levels of *Nkx2.2* had low or  
40 undetectable levels of mKate2 expression (Fig 4J and Fig S6F). Thus, distinct  
41 Olig2 expression dynamics underlie the progression of pMN cells to MNs and  
42 p3 progenitors.

1

## 2 **Inhibiting Notch signaling increases Olig2 expression**

3 These observations raise the question of what upregulates Olig2 prior to MN  
4 formation. The Notch signalling pathway is implicated in controlling the rate of  
5 neurogenesis and inhibition of Notch signalling in NPs is well known to trigger  
6 neuronal differentiation (Artavanis-Tsakonas 1999; Selkoe and Kopan 2003;  
7 Shimojo et al. 2011; Louvi and Artavanis-Tsakonas 2006). Furthermore, the  
8 inferred MN differentiation trajectory indicated that two canonical effectors of  
9 the Notch pathway, Hes1 and Hes5, decreased as cells switched from the  
10 early phase of Olig2<sup>LOW</sup> expression to Olig2<sup>HIGH</sup>. We therefore tested whether  
11 inhibiting Notch signalling upregulated Olig2. As expected, inhibition of Notch  
12 signalling, through the addition of the  $\gamma$ -secretase inhibitor Dibenazepine  
13 (DBZ), for 24 hours between day 5 and day 6 of differentiation caused a  
14 substantial increase in the number of neurons observed (Fig 4K, compare Fig  
15 S6C and I). Quantifying mKate2 levels using flow cytometry revealed a  
16 similarly substantial increase in the number of cells expressing high levels of  
17 mKate2 (Fig 4L and Fig S6G). Furthermore, co-staining these cells with the  
18 pan-neuronal marker Tubb3 revealed that most of the mKate2<sup>HIGH</sup> cells were  
19 neurons (Fig S6I). To test whether the increase in mKate2 fluorescence is due  
20 to increased Olig2 expression upon Notch inhibition, we quantified mRNA  
21 levels of *Olig2* and other progenitor and neuronal markers using RT-qPCR  
22 after 0, 12 and 24 hours of Notch inhibition (Fig S6J-L). In contrast to other  
23 progenitor markers (*Hes1/5*, *Sox2*, *Pax6*), which decreased upon Notch  
24 inhibition (Fig S6J), *Olig2* levels peaked at 12 hours before decreasing after  
25 24 hours, (Fig S6K). The observed *Olig2* expression dynamics are strikingly  
26 similar to those of other genes previously implicated in MN formation,  
27 including *Ngn2* and *Pou3f2* (Fig S6K). Consistent with the increase in the  
28 expression of neurogenic markers after 12 hours, we also observed an  
29 increase in the expression of neuronal genes 12 hours and 24 hours after  
30 Notch inhibition (Fig S6L). Taken together, these data suggest that Notch  
31 signalling controls the transition between the distinct phases of *Olig2*  
32 expression by restraining *Olig2* expression in MN progenitors.

33

## 34 **Olig2 represses the expression of Hes1/Hes5**

35 To test whether the upregulation of Olig2 coincided with the downregulation of  
36 Hes1 and Hes5 *in vivo* we examined the expression of these proteins in  
37 mouse embryos. Hes1 is broadly expressed by dorsal progenitors that  
38 express the homeodomain protein Pax3, as well as floor plate and p3 cells,  
39 marked by the expression of Foxa2 and Nkx2.2, respectively (Fig 5B,C,F,G)  
40 (Hatakeyama et al. 2004). By contrast, Hes5 is expressed by cells in the  
41 intermediate spinal cord, marked by the expression of Irx3 and Pax6 (Fig  
42 5B,D,E). Olig2 expression was first detectable at e8.5, a time at which Hes5

1 was broadly expressed throughout the ventral neural tube (Fig 5M). Shortly  
2 thereafter, Olig2 and Hes5 showed a high degree of co-expression, which  
3 coincided with an increase in the number of Olig2 expressing MN progenitors  
4 (Fig 5N-R). However, coexpression of Olig2 and Hes5 appeared to be  
5 transient, as by e9.5, Hes5 was downregulated in most Olig2+ cells, and few  
6 co-expressing cells could be found by e10.5 (Fig 5Q). During this time, Hes1  
7 expression was low or absent in most MN progenitors (Fig 5H-L). The  
8 progressive decrease in Hes5 expression from Olig2+ cells was mirrored by a  
9 reciprocal increase in Ngn2 expression and, subsequently, the exit of these  
10 cells from the cell cycle and the onset of MN differentiation marker expression  
11 (Fig5 M'-Q', Novitsch et al, 2001; Miziguchi et al. 2001, Lee et al. 2005). Thus,  
12 the transient coexpression of Olig2 and Hes5 *in vivo* marks the pMN state,  
13 while the clearance of Hes5 from Olig2-positive cells coincided with the onset  
14 of Ngn2 expression and MN differentiation.

15  
16 We next asked whether Olig2 might be responsible for the repression of *Hes1*  
17 and *Hes5* using *Olig2<sup>Cre</sup>* knock-in mice (Dessaud et al 2007; Kong et al.  
18 2015). In these mice, the Olig2 coding sequence has been replaced with Cre  
19 recombinase (Dessaud et al 2007). Thus, Cre protein expression demarcates  
20 the presumptive pMN domain in heterozygous control and in homozygous  
21 *Olig2<sup>Cre/Cre</sup>* mutant embryos, which entirely lack Olig2 activity (Fig 6A,E). In  
22 controls, the pMN domain was flanked dorsally and ventrally by Hes5 and  
23 Hes1 expression, respectively, with little overlap of Cre with either protein (Fig  
24 6C-D',I). By contrast, *Olig2* mutant spinal cords displayed a marked dorsal  
25 expansion of Hes1 and ventral expansion of Hes5 into the pMN domain, such  
26 that their expression domains appeared to contact one another (Fig 6G-I).  
27 This juxtaposition was associated with a substantial decrease in the number  
28 of cells expressing Ngn2 in the pMN domain (Fig 6B,F,I). Thus, Olig2 is  
29 required to maintain the boundaries of Hes1 and Hes5 and allow Ngn2 to  
30 accumulate within MN progenitors (Fig 6I).

31  
32 To address whether Olig2 expression was sufficient to repress *Hes1* and  
33 *Hes5*, we used *in ovo* electroporation to deliver retroviral expression  
34 constructs driving the expression of a myc-tagged form of OLIG2 into the  
35 developing spinal cord of Hamburger-Hamilton (HH) stage 11-13 chick  
36 embryos. These conditions have been previously shown to increase *NGN2*  
37 expression (Novitsch et al. 2001). Whereas mammals have a single *Hes5*  
38 gene, birds contain three *Hes5* paralogs, termed *HES5-1*, *HES5-2*, and  
39 *HES5-3* (Fior and Henrique 2005), clustered at a common genomic locus (Fig  
40 7A). When Olig2 was misexpressed, all three chick *HES5* genes were  
41 substantially reduced, as was the chick *Hes1*-related gene *HAIRY1* (Fig 6J-  
42 N). Similar results were achieved with misexpression of a dominant repressor

1 form of OLIG2 containing its bHLH DNA binding domain fused to a  
2 heterologous Engrailed transcriptional repression domain (Fig 6O-S; Novitch  
3 et al. 2001). Based on these results we conclude that Olig2 expression  
4 suffices to repress *Hes* gene expression in NPs.

5  
6 Hes proteins and pro-neural bHLH TFs such as Ngn2 act antagonistically in  
7 multiple developmental contexts (Kageyama et al. 2007; Shimojo et al. 2011)  
8 and ectopic Olig2 expression has been shown to promote Ngn2 expression  
9 (Novitch et al. 2001). Two sequences of events could explain the repression  
10 of *Hes* genes and induction of Ngn2 in MN progenitors. Either Olig2 represses  
11 *Hes1/5* and thereby indirectly induces Ngn2 or, alternatively, Olig2 induces  
12 Ngn2, which then antagonizes the expression of the Notch effectors. To  
13 distinguish between these possibilities, we investigated if Olig2 represses  
14 *Hes5* in *Ngn2* null mutants (Fig S7A-F"). To this end, we utilized a *Ngn2*  
15 knock-in GFP (*Ngn2*<sup>KIGFP</sup>) mouse line, in which an IRES-GFP construct has  
16 been inserted into the coding sequence of *Ngn2* (Seibt et al. 2003). Assays at  
17 e9.5 and e10.25 revealed that Olig2 expression was maintained (Fig S7A'-F')  
18 and *Hes5* repressed in MN progenitors lacking Ngn2 (Fig S7A''-F'').  
19 Consistent with the observed repression of *Hes5*, GFP expression from the  
20 endogenous *Ngn2* locus was strongly elevated in MN progenitors (Fig S7C-  
21 F). We therefore conclude that Olig2, not Ngn2, is the main repressor of *Hes*  
22 genes in MN progenitors.

23  
24 These findings raise the question of how important the Olig2-mediated  
25 repression of *Hes* genes is for the pattern of neurogenesis in the ventral  
26 spinal cord. To address this, we investigated the consequences of preventing  
27 Olig2-mediated repression by ectopically expressing chick *HES5-2*, an  
28 ortholog of murine *Hes5*, in the ventral spinal cord of chick embryos. Ectopic  
29 *HES5-2* expression did not have a noticeable effect on the levels of the  
30 progenitor markers SOX2, NKX6.1, PAX6 and OLIG2 (Fig S7G-J). By  
31 contrast, and consistent with the well-known anti-neurogenic role of Hes  
32 proteins (Ohtsuka et al. 1999; Hatakeyama et al. 2004; Imayoshi et al. 2013),  
33 ectopic *HES5-2* resulted in the down-regulation of the pro-neuronal TFs  
34 NGN2 and NEUROD4 and of the pan-neuronal marker NEUN (Fig S7K-Q). Of  
35 note, cells that maintained NGN2 and NEUROD4 in these experiments  
36 usually contained little if any GFP, marking transfected cells, suggesting they  
37 were not electroporated (Fig S7N,O). Consistent with this, only a minor  
38 fraction of GFP-electroporated cells left the ventricular zone and activated  
39 NEUN expression (compare Fig S7M and P). These results suggest that the  
40 repression of *Hes* genes is the key mechanism by which Olig2 promotes  
41 neurogenesis, and that the anti-neurogenic function of Hes proteins needs to  
42 be overcome before *Ngn2* can be induced and neurogenesis initiated.

1 Together, these data indicate that Olig2 plays a critical role repressing the  
2 expression of *Hes* genes within MN progenitors to promote the expression of  
3 pro-neurogenic bHLH TFs such as Ngn2 and Neurod4 and thereby increases  
4 the rate of neuronal differentiation in MN progenitors.

### 6 **Olig2 acts directly on a Hes5 regulatory element**

7 The striking effects of Olig2 on *Hes1* and *Hes5* expression prompted us to ask  
8 whether Olig2 might directly regulate these genes. Examination of chromatin  
9 immunoprecipitation data from mouse NPs revealed several prominent  
10 binding sites of Olig2 in the vicinity of the two loci (Fig 7B) (Kutejova et al.,  
11 2016, <http://www.ebi.ac.uk/ena/data/view/ERX628418>). Furthermore, some of  
12 these binding sites are in close proximity to previously mapped binding sites  
13 for the Notch signalling co-factor RBPJ (Li et al. 2012). Bound regions  
14 included sites close to the transcription start sites of the genes and in putative  
15 distal regulatory elements (Fig 7B). Aligning genomic sequences of the *Hes5*  
16 locus from chick, mouse, and human, indicated that one of the binding sites  
17 for Olig2 and RBPJ coincided with a highly conserved ~200 base pair  
18 element, hereafter termed Hes5(e1), that is 80% identical between mouse  
19 and human, and 53% identical between chick and mouse (Fig 7A,B). This  
20 element is 7.9 kilobases (kb) 5' to the transcriptional start site for *Hes5* in  
21 mouse, 10.5 kb 5' to the transcriptional start site in human, and in the middle  
22 of the *HES5* gene cluster in chick.

23  
24 Like many bHLH proteins, Olig2 binds to canonical E-box DNA response  
25 elements with the palindromic sequence CANNTG (Lee et al. 2005). This  
26 motif was found within the most conserved central region of the Hes5(e1)  
27 element (87% identity between chick and mouse over 46 bp; 98% identity  
28 between mouse and human) (Fig 7A). To confirm that Olig2 could bind to the  
29 Hes5(e1) element, we performed *in vitro* binding experiments using a probe  
30 comprising the conserved central region. *In vitro* translated Olig2 readily  
31 bound to the Hes5(e1) E-box, as did other bHLH proteins such as E12 and  
32 Ngn2 (Fig 7C,D). These binding activities were abolished when the conserved  
33 E-box sequence was mutated (Fig 7C). To test if Olig2 binding activity is  
34 enhanced by the presence of E proteins, we mixed Olig2 protein with E12, but  
35 found no evidence of either an Olig2:E12:DNA complex or enhanced binding  
36 affinity to the Hes5(e1) E-box (Fig 7C). In addition, mixing Olig2 with Id1, a  
37 potent competitor for E protein binding, did not diminish Olig2 binding  
38 although mixing E12 and Ngn2 with Id1 completely abolished both E12 and  
39 Ngn2/E12 binding activities (Fig 7D). The binding of both Olig2 and Ngn2 to  
40 Hes5(e1) was further confirmed through chromatin immunoprecipitation  
41 experiments (Fig S8A). Taken together, these data indicate that Olig2



1 homodimers bind directly to a highly conserved Hes5(e1) regulatory element  
2 through a single E-box site that may be targeted by other bHLH proteins.

### 4 **The Hes5(e1) Element Restricts Gene Expression from the pMN**

5 The observation that Olig2 could bind to the conserved element within the  
6 *Hes5* locus prompted us to test whether this element restricted gene  
7 expression selectively from the pMN domain. To test this, we generated  
8 reporter constructs consisting of Hes5(e1) with or without an intact E-box,  
9 upstream of a  $\beta$ -globin minimal promoter driving expression of a nuclear  
10 *Enhanced Green Fluorescent Protein (EGFP)* gene (Hes5(e1)- $\beta$ G::*nEGFP*)  
11 (Fig 8C). We co-electroporated these constructs into the chick spinal cord  
12 together with a nuclear  $\beta$ -galactosidase ( $\beta$ gal) encoding plasmid (Fig 8A-E).  
13 CAG- driven  $\beta$ gal expression appeared to be uniform throughout the dorsal-  
14 ventral axis of the neural tube (Fig 8A,D). By contrast, Hes5(e1)- $\beta$ G::*nEGFP*  
15 activity was spatially restricted, with high levels of expression in the  
16 intermediate portions of the neural tube but little if any expression in both  
17 ventral and dorsal regions (Fig 8B). Strikingly, the ventral limit of Hes5(E1)-  
18  $\beta$ G::*nEGFP* expression coincided with the dorsal border of the Olig2  
19 expression domain (Fig 8B,F).

20  
21 To determine whether the E-box within Hes5(e1) was essential for this  
22 spatially restricted expression pattern, we compared the activity of a  
23 Hes5(e1)- $\beta$ G::*nEGFP* reporter construct in which the E-box had been mutated  
24 (Hes5(e1 $\Delta$ E)- $\beta$ G::*nEGFP*) (Fig 8D-F). Loss of the E-box substantially reduced  
25 the overall activity of the nEGFP reporter compared to the original construct  
26 (Fig S8B,C). In addition, nEGFP expression now showed abundant overlap  
27 with Olig2 in the ventral spinal cord (Fig 8E,F). Together, these results  
28 indicate that the Hes5(e1) element integrates both positive and negative  
29 regulatory information through its E-box.

30  
31 Finally, to test whether Olig2 is responsible for the restriction of Hes5(e1)-  
32  $\beta$ G::*nEGFP* from the pMN domain we generated transgenic mice containing  
33 this construct that displayed activity throughout the neuraxis (Fig 8G). In  
34 agreement with the chick electroporation data, Hes5(e1)- $\beta$ G::*nEGFP* activity  
35 was spatially restricted, with high levels of expression seen only in  
36 intermediate regions of the spinal cord where high levels of Hes5 were  
37 expressed (Fig 8H-J). The ventral extent of Hes5(e1)- $\beta$ G::*nEGFP* activity  
38 coincided with the dorsal border of the pMN domain with little overlap between  
39 Olig2 and GFP (Fig 8H). By contrast, in *Olig2* mutant embryos the expression  
40 of Hes5(e1)- $\beta$ G::*nEGFP* extended ventrally to reach the dorsal boundary of  
41 *Nkx2.2*, a result that was not seen in control embryos (Fig 8K-P). Together,

1 these data provide evidence that Olig2 represses expression of Hes5 in the  
2 pMN domain at least in part through direct interactions with the E-box site  
3 within Hes5(e1).

## 4 **DISCUSSION**

6 Here, we provide a detailed molecular description of somatic MN  
7 differentiation. Single cell transcriptomics defines distinct phases of  
8 differentiation and reveals the regulatory relationships that drive progression  
9 from NPs to post-mitotic MNs. Experimental validation confirmed these  
10 predictions and demonstrated that Olig2 plays a pivotal role coordinating  
11 growth and patterning by integrating differentiation and fate determination  
12 signals (Fig 9).

### 14 **The trajectory of neural progenitor to MN differentiation**

15 Single cell mRNA sequencing is emerging as a powerful tool to reconstruct  
16 transcriptional changes in cells during tissue development (Shin et al. 2015;  
17 Setty et al. 2016; Trapnell et al. 2014; Treutlein et al. 2016). Here, we use  
18 pseudo-temporal ordering of cells based on their expression profile to obtain a  
19 high-resolution map of the developmental trajectory of MN differentiation (Fig  
20 2). Examining gene expression along this timeline highlighted the dynamics of  
21 signalling pathways and transcriptional networks as cells transit from  
22 proliferative progenitors to postmitotic neurons. This computationally  
23 reconstructed trajectory accurately recapitulated the known changes in gene  
24 expression associated with MN generation *in vivo* and identified features of  
25 the dynamics not previously evident. This provides evidence that, by  
26 exploiting the inherent heterogeneity and asynchrony of differentiating cells  
27 that confound population based assays, scRNA-seq allows the inference of  
28 transcriptional dynamics during developmental cell state transitions with high  
29 resolution. Moreover, the data illustrate how scRNA-seq analysis of a defined  
30 developmental process *in vitro* accurately predicts gene regulatory  
31 interactions and transcriptional dynamics *in vivo*.

33 Examination of the timeline revealed periods of relatively stable gene  
34 expression. Punctuating these were transition phases with marked differences  
35 in gene expression profiles, which coincided with changes in the signalling  
36 status within the cells. This is consistent with the saltatory view of cell fate  
37 specification in which differentiation proceeds through a series of metastable  
38 states separated by coordinated signal-driven changes in gene expression  
39 (Moris et al. 2016). Based on this observation, we used the global rate of  
40 change in gene expression in the pseudo-temporal orderings to develop a  
41 principled approach that objectively defines these phases. These distinct  
42 phases identified in MN differentiation corresponded to known cell types.

1 Expression of *Irx3* marked early, uncommitted NPs, normally located in the  
2 intermediate spinal cord. These progenitors transition to pMN cells in  
3 response to Shh and retinoid signalling and this was identifiable by the  
4 upregulation of *Olig2* and downregulation of *Irx3*. In addition, distinct phases  
5 in the acquisition of postmitotic MN identity could be identified with cells  
6 expressing markers such as *Lhx3*, *Isl1/2* and *Chat* correctly positioned in the  
7 pseudo-temporal ordering.

8

9 The temporal ordering provided much greater resolution of the sequence of  
10 events leading to MN commitment than previously available. In particular, the  
11 transition from MN progenitor to MN was associated with a series of distinct  
12 and transient expression changes. This included the induction of well-known  
13 pro-neurogenic factors such as *Ngn2*, *Neurod1*, *Neurod4* and *Hes6* (Fig 2E  
14 and Fig S3F). Increased expression of *Olig2* was also associated with this  
15 stage (Fig 2F). Consequently, the level of *Olig2* expression distinguished two  
16 sequential stages in MN progenitors during their differentiation. In the earlier  
17 phase, initiated as *Irx3* is downregulated, pMN cells express low or moderate  
18 levels of *Olig2*. This is followed by the second phase in which the levels of  
19 *Olig2* substantially increase and *Ngn2* becomes expressed at high levels (Fig  
20 2C). *In vivo* analysis, together with the short-term lineage tracing afforded by  
21 the *Olig2*-mKate2 reporter, confirmed that *Olig2* upregulation coincided with  
22 the commitment to differentiate into postmitotic MNs. By contrast, in the  
23 earlier phase of pMN development, the lower levels of *Olig2* appeared  
24 compatible with the transition of cells to *Nkx2.2* and *Fabp7* expressing p3  
25 progenitors (Fig S3C,D). Together, these data provide new insight into the  
26 process of MN specification, identifying a series of distinct phases in NP  
27 differentiation to fate commitment and highlighting the changes in gene  
28 expression that characterise phase transitions.

29

### 30 **Olig2 as a coordinator of neurogenesis**

31 Previous studies have shown that both *Olig2* and *Ngn2* are required for the  
32 elaboration of MN identity and that *Olig2* activity induces *Ngn2* expression  
33 (Novitch et al. 2001; Mizuguchi et al. 2001; Takebayashi et al. 2002; Lu et al.  
34 2000). Consistent with these observations, progenitors in the *Olig2* expression  
35 domain differentiate at a much higher rate than cells in other progenitor  
36 domains of the neural tube (Kicheva et al. 2014; Novitch et al. 2001). Our  
37 results suggest a mechanism for this enhanced rate of neuronal  
38 differentiation. The canonical Notch effectors *Hes1* and *Hes5* act to suppress  
39 neurogenesis by inhibiting the expression of neurogenic bHLH proteins, thus  
40 maintaining NPs in an undifferentiated state (Ohtsuka et al. 1999; Shimojo et  
41 al. 2011). *Olig2* activity represses *Hes1* and *Hes5* thereby allowing expression  
42 of the proneural gene *Ngn2* and downstream effectors such as *Neurod4* (Fig

1 6 and Fig S7). The ability of Olig2 to repress *Hes5* appears to be direct, as  
2 Olig2 binds to a conserved regulatory element within the *Hes5* locus that  
3 restricts gene expression from MN progenitors (Fig 7 and Fig 8). Similarly,  
4 Olig2 binding sites are found in putative regulatory elements associated with  
5 the *Hes1* gene, raising the possibility that this regulatory interaction is also  
6 direct. Consistent with a role for Olig2 in promoting neuronal differentiation,  
7 the levels of Olig2 transcript and protein peak at the onset of neurogenesis,  
8 concomitant with the induction of *Ngn2* *in vivo* and *in vitro* (Fig 2 and Fig 3).  
9 These findings therefore establish a mechanism by which neural patterning  
10 and neurogenesis intersect. In this view, by modulating the Notch pathway,  
11 the Shh and retinoid-dependent induction of Olig2 not only specifies MN  
12 identity but also determines the rate at which these progenitors differentiate,  
13 thus imposing the distinctive kinetics of MN production (Fig 9).

14  
15 This model is surprising as previous studies suggested antagonistic activities  
16 for Olig2 and *Ngn2* during the induction of neuronal target genes (Lee et al.  
17 2005). Both Olig2 and *Ngn2* have been shown to heterodimerise with E47 and  
18 bind to E-box elements but with opposing activities (Lee et al. 2004, 2005). In  
19 addition, similar to Id proteins, Olig2 proteins could potentially sequester E  
20 proteins (E12 and E47) from forming heterodimeric *Ngn2*/E-protein complexes  
21 that activate transcription (Samanta and Kessler 2004; Lee et al. 2005). The  
22 sequential expression of Olig2 and *Ngn2* has been proposed as a potential  
23 mechanism to reconcile the inhibitory activity of Olig2 on neurogenesis with  
24 the high rate of neurogenesis in the pMN domain (Lee et al. 2005). However,  
25 our results suggest that this mechanism is unlikely to apply to the  
26 differentiation of MNs in the spinal cord for several reasons. The higher  
27 temporal resolution provided by the pseudo-temporal ordering indicated that  
28 primary *Ngn2* target genes such as *Dll1* and *Neurod4* are induced when the  
29 rate of Olig2 expression is maximal in cells (Fig 2E and Fig S3F).  
30 Furthermore, Olig2 protein perdures longer in differentiating MNs than *Ngn2*,  
31 resulting in significant co-expression of Olig2 and early MN markers such as  
32 *Lhx3* and *Mnx1* in *Ngn2*-negative cells (Fig 3H and Fig S5B,C). Hence,  
33 instead of sequential expression of these proteins, these results suggest that  
34 *Ngn2* is capable of mediating neurogenesis despite the presence of high  
35 Olig2 levels.

36  
37 A potential solution to this puzzle may be that the activities of both Olig2 and  
38 *Ngn2* are regulated by phosphorylation. Olig2 phosphorylation at specific  
39 Ser/Thr residues regulates its choice of dimerization partner, intracellular  
40 localization and DNA binding preference for open and closed chromatin (Sun  
41 et al. 2011; Meijer et al. 2014; Li et al. 2011; Setoguchi and Kondo 2004).  
42 Indeed, homodimeric complexes of Olig2 appear to mediate *Hes5* repression

1 (Fig 7C,D). Furthermore, the cell cycle kinases CDK1/2 have been proposed  
2 to phosphorylate Olig2 at Ser14, priming Olig2 for further phosphorylation at  
3 multiple Ser residues (Zhou et al. 2017). This phosphorylation appears to  
4 regulate the preference of Olig2 for open or closed chromatin and, thus,  
5 strongly influences its biological activity (Meijer et al. 2014). The declining  
6 levels of CDK1/2 during neurogenesis may similarly affect Olig2 activity to  
7 overcome its inhibitory role on neuronal gene expression. Similarly,  
8 phosphorylation of Ngn2 affects its stability and interaction with Lim-  
9 homeodomain TF complexes and E-proteins (Ma et al. 2008; Hindley et al.  
10 2012; Ali et al. 2011; McDowell et al. 2014). Thus, additional post-translational  
11 events extend the regulatory interactions between both proteins beyond  
12 stoichiometric interactions through protein-protein binding and competition for  
13 DNA binding sites. Notably, some of the relevant phosphorylations are  
14 performed by protein kinase A (PKA) and glycogen-synthase kinase 3  
15 (GSK3), kinases linked to the activity of the Shh pathway, which appears to  
16 peak at the initiation of MN differentiation (Balaskas et al. 2012; Li et al. 2011;  
17 Ma et al. 2008; Kicheva et al. 2014). Connecting the activity of these  
18 neurogenic TFs to the activity of the Shh pathway would allow a tight coupling  
19 between MN generation and overall developmental dynamics dictated by the  
20 dynamics of morphogen signalling.

21  
22 The pseudo-temporal ordering indicated that although *Olig2* levels peaked at  
23 the onset of MN differentiation, expression then decreased rapidly, prior to  
24 MNs reaching the next metastable state along the differentiation trajectory,  
25 characterised by the induction of mature MN markers such as *Isl2* and *Chat*  
26 (Fig 2). This suggests that *Olig2* may need to be downregulated to allow  
27 progression of MN differentiation. Consistent with this, overexpression of  
28 *Olig2* has been shown to inhibit the generation of MNs and to directly repress  
29 genes associated with MN identity, such as *Hb9* (Lee et al. 2004, 2005).  
30 Furthermore, the addition of *Olig2* to canonical reprogramming factors  
31 decreases the efficiency of conversion from fibroblasts to spinal MNs (Son et  
32 al. 2011). Thus, *Olig2* upregulation can promote MN generation by initiating  
33 differentiation but its downregulation is needed to complete the switch from  
34 progenitor to post-mitotic neuron. These dynamics of *Olig2* expression may  
35 help impose directionality to differentiation and ensure the correct temporal  
36 sequence of gene expression occurs as MNs mature.

37

### 38 **Oscillation of bHLH TFs in the spinal cord**

39 The maintenance of NPs in the brain has been ascribed to the oscillatory  
40 expression of Hes and proneural bHLH TFs (Imayoshi et al. 2013; Shimojo et  
41 al. 2008). The Hes proteins are proposed to generate the oscillations by  
42 negatively regulating their own expression as well as *Ngn2* and *Ascl1*

1 (Takebayashi et al. 1994; Imayoshi and Kageyama 2014; Shimojo et al.  
2 2011). This phenomenon results in Hes1 and proneural bHLH TFs exhibiting  
3 reciprocal expression phases at an equivalent frequency (Shimojo et al. 2008;  
4 Imayoshi et al. 2013). Oscillations in the levels of the Notch ligand Dll1 have  
5 been reported in spinal cord progenitors (Shimojo et al. 2016). In cortical  
6 progenitors, fluctuations in Olig2 levels have also been documented, but  
7 these oscillations occur at a significantly slower frequency (Imayoshi et al.  
8 2013) and may therefore be regulated by a different mechanism.

9  
10 Although we did not specifically investigate the occurrence of bHLH  
11 oscillations in the spinal cord *in vitro* or *in vivo*, our results may shed light on  
12 this question. The Hes5(e1) element can be bound by both Olig2-Olig2  
13 repression dimers and Ngn2-E12 activation complexes (Fig 7B,C and Fig  
14 S8A). It is notable that mutation of the E-box in this element reduced the  
15 overall level of reporter activity in the spinal cord (Fig S8B,C), at the same  
16 time as disrupting its spatial restriction from the pMN (Fig 8). These data are  
17 consistent with a model in which positive activators, such as Ngn2 or other E-  
18 box binding factors, could interact with Hes5(e1) to directly elevate Hes5  
19 expression, which would in turn serve to repress Ngn2 expression, thereby  
20 contributing to alternating phases of Hes5 and Ngn2 expression. In this  
21 regard, Olig2 binding and repressing Hes5 through this element would  
22 interrupt the oscillator, allowing Ngn2 expression to reach its maximal levels  
23 and neuronal differentiation to commence. Thus, by inserting itself into the  
24 Notch regulated neural differentiation program, Olig2 shuts down Notch  
25 activity, ensuring MN development proceeds in a spatially and temporally  
26 controlled manner. This reconciles stochastic and oscillatory models of  
27 neuronal differentiation with the spatially predetermined pattern of neuron  
28 production observed in the spinal cord.

29  
30 To examine Olig2 expression, we used the relatively long half-life fluorescent  
31 protein mKate2 introduced into the *Olig2* genomic locus. Quantification of the  
32 levels of mKate2 and Olig2 revealed a striking correlation between both  
33 proteins in NPs (Fig S6D-F). This argues against Olig2 oscillations in these  
34 cells, as oscillatory behaviour would be expected to decrease the correlation  
35 between both proteins. Although further investigation is necessary, the data  
36 are consistent with out-of-phase oscillations between Ngn2 and Hes5, while  
37 Olig2 levels steadily increase in MN progenitors over time. Understanding  
38 these relationships will provide insight into the transition from MN progenitor  
39 to differentiation.

#### 40 41 **The Notch pathway regulates Olig2 expression and Shh signaling**

1 Besides promoting neurogenesis, inhibition of Notch effectors also appears to  
2 be important for dorsal-ventral patterning of the neural tube and the  
3 consolidation of pMN identity. Patterning of the ventral neural tube is  
4 mediated by a gene regulatory network that interprets both levels and duration  
5 of Shh signalling (Balaskas et al. 2012; Cohen et al. 2014; Dessaud et al.  
6 2010; Sagner and Briscoe 2017). Previous studies have suggested that Notch  
7 signalling influences patterning of the ventral spinal cord by promoting the  
8 activity of the Shh pathway (Kong et al. 2015; Stasiulewicz et al. 2015).  
9 Consistent with this, overexpression of *HAIRY2*, the chick homologue of  
10 murine *Hes1*, causes a downregulation of *Olig2* and induction of *Nkx2.2* in the  
11 pMN domain (Stasiulewicz et al. 2015). Similarly, sustained activation or  
12 inhibition of the Notch pathway causes, respectively, a ventral expansion or  
13 recession in p3 progenitors, located ventral to the pMN (Kong et al. 2015).  
14 Here, we show that besides modulating Shh activity, Notch signalling can also  
15 regulate expression levels of *Olig2*. Conversely, *Olig2* represses the canonical  
16 Notch effector *Hes5* and could thereby negatively regulate the levels of Shh  
17 signalling in the pMN domain. Thus, *Olig2* may consolidate pMN identity not  
18 only by direct repression of other progenitor markers, but also indirectly by  
19 modulating levels of Shh signalling through its effect on Notch pathway.

20

21 Taken together, our data reveal a tight coupling between the gene regulatory  
22 networks that control patterning and differentiation in the ventral spinal cord.  
23 This highlights the pivotal role of *Olig2* in this process, which not only acts as  
24 central organizer of dorsal-ventral patterning in the spinal cord, but also as  
25 developmental pacemaker for MN formation. The *Olig2*-mediated repression  
26 of Notch pathway targets provides a molecular mechanism for the much  
27 higher rate of neurogenesis observed in the pMN domain compared to the  
28 rest of the spinal cord and thereby explains the spatial and temporal patterns  
29 of neurogenesis observed in the neural tube. These findings raise the  
30 question of whether similar mechanisms also apply in other progenitor  
31 domains in the neural tube.

## 1 EXPERIMENTAL PROCEDURES

### 2 3 Animal Welfare

4 Animal experiments in the Briscoe lab were performed under UK Home Office  
5 project licenses (PPL80/2528 and PD415DD17) within the conditions of the  
6 Animal (Scientific Procedures) Act 1986. Animals were only handled by  
7 personal license holders. *Olig2<sup>Cre</sup>* and *Ngn2<sup>K1GFP</sup>* knock-in/knockout mice were  
8 used as previously described (Seibt et al. 2003; Dessaud et al. 2007), and  
9 interbred to create *Olig2* or *Ngn2* mutant embryos. All mice in the Novitch lab  
10 were maintained and tissue collected in accordance with guidelines set forth  
11 by the UCLA Institutional Animal Care and Use Committee. Fertilized chicken  
12 eggs were acquired from AA McIntyre Poultry and Fertile Eggs, incubated and  
13 electroporated as previously described (Gaber et al. 2013).

### 14 15 Differentiation of NPs from mouse ESCs

16 NPs were differentiated as described previously (Gouti et al. 2014). In brief,  
17 HM1 (Thermo Scientific), DVI2 and *Olig2::T2A-mKate2* ESCs were  
18 maintained in ES cell medium with 1000 U/ml LIF on mitotically inactivated  
19 mouse embryonic fibroblasts (feeder cells). DVI2 cells were generated by  
20 integrating a 8xGBS-H2B::Venus *Shh* pathway reporter into the *HPRT* locus  
21 of HM1 cells and used for all ESC experiments except 4-color stainings in Fig  
22 S5A,B, which rely on HM1 cells, and experiments in Fig 4 and Fig S6 which  
23 were conducted using the *Olig2::T2A-mKate2* reporter cell line.

24  
25 For differentiation cells were dissociated in 0.05% Trypsin (Gibco) and  
26 replated onto tissue culture plates for 25 minutes to remove feeder cells. Cells  
27 staying in the supernatant were spun down and resuspended in N2B27  
28 medium at a concentration of  $10^6$  cells / ml. 45000 cells were plated onto 35  
29 mm CellBind dishes (Corning) precoated with 0.1% Gelatine solution in 1.5 ml  
30 N2B27 + 10 ng / ml bFGF. At D2 medium was replaced with N2B27 + 10 ng /  
31 ml bFGF + 5  $\mu$ M CHIR99021 (Axon). At D3, and every 24 hours afterwards,  
32 medium was replaced with N2B27 + 100 nM RA (Sigma) + 500 nM SAG  
33 (Calbiochem). For Notch inhibition differentiations were treated at day 5 with  
34 N2B27 + 100 nM RA + 500 nM SAG + 10 ng/ $\mu$ l DBZ (Tocris Biosciences) for  
35 24 hours. Cells were washed with N2B27 medium at later medium changes  
36 when many dead cells were detected in the dish.

### 37 38 qPCR analysis

39 mRNA was extracted using RNeasy Mini Kit (Qiagen) according to the  
40 manufacturer's instructions. 1.5 - 2  $\mu$ g of RNA was used for reverse  
41 transcription using Super-Script III First-Strand Synthesis kit (Invitrogen) with  
42 random hexamers. Platinum SYBR Green qPCR mix (Invitrogen) was used



1 for amplification on a 7900HT Fast Real Time PCR machine (Applied  
2 Biosystems). Expression values were normalized against  $\beta$ -actin. Three  
3 independent repeats of each RT-qPCR time-course were performed and three  
4 independent samples at each time point of each repeat were analyzed. For a  
5 complete list of used primers see Table S1. qPCR data presented in Figs 1,  
6 S1, and S6 shows one representative repeat and shows mean  $\pm$  standard  
7 deviation. Heatmap in Fig S2B was plotted using Graphpad Prism 7.

8

### 9 **Immunofluorescent stainings**

10 Cells were washed using N2B27 medium and PBS (Gibco) and then fixed in  
11 4% paraformaldehyde in PBS at 4°C for 20 minutes. After fixation cells were  
12 washed twice with PBS and stored in a fridge till stainings were performed. For  
13 staining, cells were washed three times in PBS containing 0.1% Triton X-100  
14 (PBS-T). Primary and secondary antibodies were diluted in PBS-T + 1% BSA.  
15 Cells were incubated with primary antibodies overnight at 4°C, then washed  
16 three times for 5-10 minutes in PBS-T, incubated with secondary antibodies  
17 for 1 hour at room temperature, and washed again three times in PBS-T.  
18 Stainings were mounted using ProLong Gold Antifade reagent (Life  
19 Technologies). Mouse and chicken spinal cord tissues were fixed with 4%  
20 paraformaldehyde, cryoprotected in 30% sucrose, sectioned, and processed  
21 for immunohistochemistry or in situ hybridization as previously described  
22 (Sasai et al. 2014; Gaber et al. 2013).

23

24 Antibodies against a peptide in the C-terminal portion of mouse Hes5  
25 (APAKEPPAPGAAPQPARSSAK, aa 127-147) were raised in rabbits and  
26 guinea pigs (Covance). The rabbit serum was affinity purified and used at  
27 1:8000, and the crude guinea pig serum at 1:16000. Additional primary  
28 antibodies were used as follows: goat anti- $\beta$ -galactosidase (Biogenesis 4600-  
29 1409 1:2000), mouse anti-Cre (Covance Covance MMS-106P, 1:2000), rabbit  
30 anti-Dbx1 (kind gift of Susan Morten and Thomas Jessell, 1:8000), rabbit anti-  
31 Fabp7 (Abcam ab32423, 1:2000 or Chemical AB9558, 1:2000), rat anti-FLAG  
32 (Stratagene 200474, 1:1500), chicken anti-GFP (Abcam ab13970, 1:20000),  
33 sheep anti-GFP (AbD Serotec 4745-1051, 1:800), rabbit anti-Hes1 (Ito et al.  
34 2000, 1:1000), mouse anti-Hoxc6 (Santa Cruz Biotechnology sc-376330,  
35 1:250), mouse anti-Hb9 (DSHB, 1:40), mouse anti-Isl1/2 (DSHB, 1:100), goat  
36 anti-Isl1 (R&D AF1837, 1:1000), rabbit anti-Lhx3 (Abcam ab14555, 1:500),  
37 mouse anti-NeuN (Rbfox3, Chemicon/Millipore MAB377, 1:1000), rat anti-  
38 chick Neurod4 (NeuroM, Bylund et al. 2003), goat anti-Ngn2 (Santa Cruz  
39 Biotechnology sc-19233, 1:500), mouse anti-Ngn2 (5C6, Lo et al. 2002, 1:50),  
40 guinea pig anti-chick Ngn2 (Skaggs et al. 2011, 1:2000), mouse anti-Nkx2.2  
41 (DSHB, 1:25), mouse anti-Nkx6.1 (DSHB, 1:100), rabbit anti-Olig2 (Millipore  
42 AB9610, 1:1000), guinea pig anti-mouse Olig2 (Novitch et al. 2003, 1:20000),

1 guinea pig anti-chick Olig2 (Novitch et al. 2001, 1:8000), rabbit anti-Pax6  
2 (Millipore AB2237, 1:1000), mouse anti-Pax6 (DSHB, 1:25), goat anti-Sox1  
3 (R&D AF3369, 1:500), goat anti-Sox2 (Santa Cruz Biotechnology sc-17320,  
4 1:2000), rabbit anti-Sox2 (Bylund et al. 2003, 1:2500), rabbit anti-TagRFP  
5 (Evrogen AB233, 1:1000), rabbit anti-Tubb3 (Covance PRB-435P, 1:2000),  
6 mouse anti-Tubb3 (Covance MMS-435P, 1:1000), rabbit anti-Zbtb18  
7 (Proteintech 12714-1-AP, 1:1000).

8

9 Secondary antibodies used throughout this study were raised in donkey.  
10 Alexa488, Alexa568, Cy3, and Dylight 647-conjugated antibodies (Life  
11 Technologies or Jackson Immunoresearch) were diluted 1:1000, Alexa647  
12 conjugated antibodies (Life Technologies) 1:500. Cy5 conjugated antibodies  
13 (Jackson Immunoresearch) 1:700, CF405M donkey anti-guinea pig secondary  
14 antibody (Sigma) 1:250.

15

### 16 **Image acquisition and analysis**

17 Immunofluorescent images of ESC-derived NPs were acquired using a Zeiss  
18 Imager.Z2 microscope equipped with an Apotome.2 structured illumination  
19 module and a 20x magnification lens (NA = 0.75). 5 phase images were  
20 acquired for structured illumination. For each image z-stacks comprised of 12  
21 sections separated by 1  $\mu\text{m}$  were acquired. Maximum intensity projection was  
22 performed in Fiji.

23

24 Cryosections were documented using a Leica SP5 confocal microscope  
25 equipped with a 40x oil objective, or Zeiss LSM5, LSM700, or LSM800  
26 confocal microscopes and Zeiss Apotome imaging systems equipped with  
27 10x, 20x, and 40x oil objectives. For nuclear staining intensity measurements  
28 3-4 individual sections separated by 1  $\mu\text{m}$  were analysed. Nuclei  
29 segmentation and intensity measurement were performed in CellProfiler. Data  
30 was normalized and plotted using R. Other images were processed and  
31 manually quantified using Fiji and Adobe Photoshop imaging software.

32

### 33 **Single Cell Sequencing**

34 NPs were dissociated using 0.05% Trypsin (Gibco), spun down in ES-  
35 medium, resuspended, washed and spun down in 10 ml PBS (Gibco).  
36 Afterwards, cells were resuspended in 1ml N2B27 and filtered into a FACS  
37 tube (Falcon). The Fluidigm C1 platform was used to capture individual cells  
38 using 96 small or medium IFC chip. Cells were diluted in the range of 250  
39 000-400 000 cells per ml for chip loading. Capturing efficiency was evaluated  
40 by manually inspecting each capture site on the chip using the automated  
41 NanoEntek JuLi cell imager. Only capture sites containing single cells were  
42 processed for library preparation and sequencing. Single cell full-length cDNA

1 was generated using the Clontech SMARTer Ultra Low RNA kit on the C1  
2 chip using manufacturer-provided protocol. ArrayControl RNA Spikes  
3 (AM1780) were added to the cell lysis mix as recommended in the Fluidigm  
4 protocol. Libraries were prepared using the Illumina Nextera XT DNA Sample  
5 Preparation kit according to a protocol supplied by Fluidigm, and sequenced  
6 on Illumina HiSeq 4000 for 75bp paired-end runs.

7

### 8 **Generation of Olig2::T2A-mKate2 ESC line by CRISPR**

9 pNTKV-T2A-3xNLS-FLAG-mKate2 was generated by cloning a T2A-3XNLS-  
10 FLAG-mKate2 cassette into pNTKV using HpaI and HindIII restriction sites.  
11 To integrate the T2A-3xNLS-FLAG-mKate2 cassette at the 3' end of the Olig2  
12 open reading frame, a donor vector comprising app. 2.8 kb upstream and 5 kb  
13 downstream of the Stop-Codon was constructed. For CRISPR/Cas9 mediated  
14 homologous recombination, a short guide RNA (sgRNA) sequence  
15 (CGGCCAGCGGGGGTGCCTCC) was cloned into pX459 (Addgene)  
16 according to (Ran et al. 2013).

17

18 For electroporation DVI2 ESCs were grown in 2i medium + LIF. 4 $\mu$ g of both  
19 plasmids were electroporated into 4\*10<sup>6</sup> cells using Nucleofector II (Amaxa)  
20 and mouse ESC Nucleofector kit (Lonza). Afterwards, cells were replated onto  
21 10 cm CellBind plates (Corning) and maintained in 2i medium + LIF. For  
22 selection cells were first treated with 1.5  $\mu$ g/ml Puromycin (Sigma) for two  
23 days and afterwards with 50  $\mu$ g/ml Geneticin (Gibco) until colonies were  
24 clearly visible. Individual colonies were picked using a 2  $\mu$ l pipette, dissociated  
25 in 0.25% Trypsin (Gibco) and replated onto feeder cells in ES-medium + 1000  
26 U/ml LIF in a 96 well plate. Correct integration of the T2A-3xNLS-FLAG-  
27 mKate2 transgene was verified using long-range PCRs.

28

### 29 **Western Blots**

30 Cells were lysed in RIPA buffer supplemented with protease inhibitors. 10  $\mu$ g  
31 of total protein was loaded per lane. Antibodies used were rabbit anti-Olig2  
32 (Millipore AB9610, 1:3000) and mouse anti- $\beta$ -tubulin (Sigma T4026, 1:2000).  
33 Secondary antibodies were donkey anti-mouse IRDye 800CW and donkey  
34 anti-rabbit IRDye 680RD (both Licor). Blots were scanned using an Odyssey  
35 Scanner (Licor).

36

### 37 **Flow Cytometry**

38 To quantify the number of Olig2::T2A-mKate2 positive cells, NPs were  
39 trypsinized in 0.05% Trypsin (Gibco) and spun down in ES medium. Cells  
40 were resuspended in PBS (Gibco) supplemented with the live-cell staining  
41 dye Calcein Violet (Life Technologies) according to the manufacturer's  
42 instructions. Flow analysis was performed using a Becton Dickinson LSRII

1 flow cytometer. HM1 or DVI2 cells were differentiated in parallel and analyzed  
2 using the same settings to estimate the number of mKate2 positive cells in Fig  
3 4L and Fig S6H. The threshold for counting cells as mKate2 positive was set  
4 to the intensity for which 0.5% of cells without the mKate2 transgene were  
5 counted as positive. 30000 events were recorded for each replicate. To count  
6 cells as mKate2<sup>HIGH</sup> cells in Fig 4L and Fig S6G, a threshold was set to the  
7 shoulder visible in the histograms of the control conditions depicted in Fig 4L.  
8 This shoulder typically appears at day 6 and is not present in day 5 cells.  
9 Based on the flow cytometry data in Fig S6C and the correlation between  
10 mKate2 fluorescence and Isl1/2 expression shown in Fig 4H, we infer that  
11 most mKate2<sup>HIGH</sup> cells are motor neurons. Cells were counted as mKate2<sup>HIGH</sup>  
12 if their mKate2 intensity exceeded this threshold.

13  
14 For analysis of Tubb3 stainings by flow cytometry (Fig S6A-C, I), cells were  
15 fixed for 20 minutes in 2% PFA on ice, washed three times in PBS-T and  
16 incubated with Alexa647-conjugated anti-Tubb3 antibody (BD Pharmingen,  
17 1:10) in PBS-T + 1% BSA for one hour at room temperature. Cells were  
18 afterwards washed 3x in PBS-T and endogenous mKate2 fluorescence and  
19 Tubb3 staining in 10000 cells were quantified by flow cytometry. Data was  
20 analyzed using FlowJo.

## 21 22 **Electrophoretic Mobilty Shift assays**

23 pCS2+ plasmid expression vectors for *Olig2*, *E12*, *Ngn2*, and *Id1* (Novitch et  
24 al. 2001) were transcribed and translated *in vitro* using the Promega TNT  
25 Coupled Wheat Germ Extract System. Programmed extracts were mixed as  
26 indicated in a buffer containing 100 mM Hepes pH 7.6, 25 mM KCl, 1.5 mM  
27 MgCl<sub>2</sub>, 0.2 mM EDTA, 2.5% glycerol, and 100 ng poly dIdC and incubated for  
28 15 min at room temperature. <sup>32</sup>P-dCTP-labeled probes were generated by  
29 Klenow end-labeling of double stranded oligonucleotides containing the native  
30 mouse Hes5(e1) sequence (forward 5'-  
31 ggccgCTCCCAAAGACCATCTGGCTCCGTGTTATAA-3'; reverse 5'-  
32 actagTTATAACACGGAGCCAGATGGTCTTTTGGGAG-3') or an E-box  
33 mutated version (forward 5'  
34 ggccgCTCCCAAAGAggATCccGCTCCGTGTTATAA-3'; reverse 5'-  
35 actagTTATAACACGGAGCggGATccTCTTTTGGGAG-3'). The E-box  
36 sequence is underlined. Lower case indicates substitutions and added  
37 flanking sequences. Samples were incubated with labeled probes for 15 min  
38 before resolving on a 4.5% polyacrylamide gel and subsequent  
39 autoradiography. Probe competition was achieved by incorporating unlabeled  
40 oligonucleotide probes in the binding reaction mix.

## 41 42 **Hes5(e1) Transgenic Assays**

1 Mouse and chick *Hes5(e1)* genomic DNA fragments were amplified by PCR  
2 using the following primers: mouse- forward 5'-  
3 gaggcggccgcCGGTTCCCACACTTTGGT-3'; reverse 5'-  
4 gagactagtCACAGTCCCAAGCTGCTTAAA-3' and chick- forward 5'-  
5 gaggcggccgcTGCGTTTCCCATACTTTTCC-3'; reverse 5'-  
6 gagactagtTCTGGCCTTGAAGCTAGGAG-3', lower case indicates added  
7 flanking sequences with restriction enzyme sites (NotI and SpeI) underlined.  
8 PCR products were digested and cloned into a reporter construct containing  
9 the  $\beta$ -globin basal promoter, a nuclear *EGFP* coding sequence, and a bovine  
10 growth hormone polyadenylation sequence ( $\beta$ G::nGFP, Lumpkin et al. 2003).  
11 Mutations of the *Hes5(e1)* E-box were generated through splicing by overlap  
12 extension PCR. Chick embryos were co-electroporated with chick *Hes5(e1)*  
13 constructs along with a plasmid vector producing nuclear-tagged  $\beta$ -  
14 galactosidase under the control of the cytomegalovirus enhancer and  $\beta$ -actin  
15 promoter. Embryos were collected, fixed, and cryosectioned. Sections were  
16 stained using antibodies to  $\beta$ -galactosidase and Olig2 and fluorescent  
17 secondary antibodies. GFP levels were measured based on its native  
18 fluorescence. Images were collected and positions of cells expressing each  
19 marker rendered using the spots function of the Bitplane Imaris 8.4 imaging  
20 suite. Calculated positions were exported and processed using Microsoft  
21 Excel and Graphpad Prism 7 software.  
22 Transgenic mice expressing the mouse *Hes5(e1)*- $\beta$ G::nGFP reporter were  
23 generated with the assistance of the University of Michigan Transgenic  
24 Animal Model Core by microinjection of purified plasmid DNA into fertilized  
25 eggs obtained by mating (C57BL/6 X SJL)F1 female mice with (C57BL/6 X  
26 SJL)F1 male mice, and subsequent transfer to pseudopregnant recipients.  
27 Analysis was conducted on both embryos collected from the primary reporter  
28 injections and offspring collected from matings of a transgenic line that  
29 passed through the germline.

30

### 31 **Electroporation and In situ hybridization**

32 Chick embryos were electroporated at Hamburger-Hamilton (HH) stages 11-  
33 13 with RCAS-myc-tagged chick *Olig2* and *Olig2*-bHLH-Engrailed plasmid  
34 constructs (Novitch et al., 2001) and collected at HH stages 21-23. Spinal  
35 cord sections were hybridized with digoxigenin-UTP labeled RNA probes  
36 generated from plasmid DNA or templates generated by PCR. 3' UTR  
37 sequences for chick *HES5-1* and *HES5-3* were amplified from spinal cord  
38 cDNA with the following primers: *HES5-1*, forward 5'-  
39 GCGGAATTCAGGGAAGCTCTCACTTAGTGAAC-3' and reverse 5'-  
40 GCGCTCGAGATACCCTCCTGCTGAAGACATTTGC-3'; *HES5-3*, forward 5'-  
41 GCGGAATTCGCCAAGAGCACGCTCACCATCACCT-3' and reverse 5'-  
42 GCGCTCGAGCTACACAGCTTGAGTTATGGTTTAG-3' and directionally

1 cloned into the pBluescript. Underlined sequence indicates restriction enzyme  
2 sites incorporated into the primers. Chick *HAIRY1* and *HES5-2* 3' UTR  
3 riboprobes were generated as previously described (Gaber et al. 2013).

#### 4 **Chromatin Immunoprecipitation-PCR**

5  
6 ESC-derived MN progenitors were dounce homogenized and sonicated in 3  
7 ml lysis buffer (1% SDS, 50 mM Tris pH 8.0, 20 mM EDTA, 1 mM PMSF, and  
8 1X Complete protease inhibitor cocktail (Roche). 150 µg of lysate DNA were  
9 used per immunoprecipitation reaction and mixed with 3-5 µl of either rabbit  
10 anti-Olig2 antibodies (Millipore AB9610), rabbit anti-Ngn2 serum (generous  
11 gift of Dr. Soo-Kyung Lee, Oregon Health Sciences University), normal rabbit  
12 sera, or purified rabbit IgG. Antibody-chromatin complexes were collected  
13 using Dynabeads protein A (Invitrogen), washed and eluted DNA used for RT-  
14 qPCR in triplicate using the following primer pairs: *Hes5(e1)* forward 5'-  
15 CTGCTTCTGAATGAATGAGGGCGG-3' and reverse 5'-  
16 AGCAGACGAGCCCTTTATTGCTCT-3'; *Hes5(e2)*, a non-conserved element  
17 3' to the *Hes5* coding exons that contains an E box, forward 5'-  
18 AGATGGCTCAGCGGTTAAGAG-3' and reverse 5'-  
19 CCATGTGGTTGCTGGGATTTG-3'. Fold enrichment for each region was  
20 calculated as compared to normal rabbit serum or purified IgG.

#### 21 **AUTHOR CONTRIBUTIONS**

22  
23 AS, ZG, JD, Conception and Design, Acquisition of Data, Analysis and  
24 interpretation of data, Drafting or revising the article, Contributed unpublished,  
25 essential data or reagents; JK, DR, CP, SW, MM, NMG, Acquisition of Data,  
26 Analysis and interpretation of data, Contributed unpublished, essential data or  
27 reagents; JB, Conception and Design, Analysis and interpretation of data,  
28 Drafting or revising the article; BN, Conception and Design, Acquisition of  
29 Data, Analysis and interpretation of data, Drafting or revising the article

#### 30 **ACKNOWLEDGEMENTS**

31  
32 We are grateful to Leena Bhaw and Abdul Sesay for excellent support with  
33 single cell sequencing, Supraja Varadarajan for assistance with Imaris image  
34 processing and Vicki Metzis for help with processing and visualizing ChIP-Seq  
35 data. We thank David Anderson, Thomas Edlund, Thomas Jessell, Soo-  
36 Kyung Lee, Susan Morton, and Tetsuo Sudo for reagents; Deborah Keller and  
37 Mina Gouti for providing the DVI2 mouse ESC line; Francois Guillemot for  
38 kindly providing *Ngn2*<sup>K1GFP</sup> mice; Lorena Belen Garcia Perez, Teresa Rayon  
39 Alonso and Christopher Demers for comments on the manuscript. The Hes5  
40 antisera were generated in Thomas Jessell's laboratory with support from the  
41 Howard Hughes Medical Institute and NINDS. AS has received funding from  
42 an EMBO LTF (1438-2013), HFSP LTF (LT000401/2014-L) and the People

1 Programme (Marie Curie Actions) of the European Union's Seventh  
2 Framework Programme FP7-2013 under REA grant agreement n° 624973.  
3 Work in JB's lab was supported by the Francis Crick Institute which receives  
4 its funding from Cancer Research UK (FC001051), the UK Medical Research  
5 Council (FC001051), and the Wellcome Trust (FC001051; WT098326MA).  
6 Work in BN's lab was supported by the UCLA Broad Stem Cell Research  
7 Center, the NINDS (R01NS053976, R01NS072804, and R01NS085227), the  
8 March of Dimes Foundation (5-FY06-7), and the Whitehall Foundation (2004-  
9 05-90-APL).

10

## 11 REFERENCES

12

- 13 Alaynick WA, Jessell TM, Pfaff SL. 2011. SnapShot: Spinal cord  
14 development. *Cell* **146**: 178.e1.
- 15 Ali F, Hindley C, McDowell G, Deibler R, Jones A, Kirschner M, Guillemot F,  
16 Philpott A. 2011. Cell cycle-regulated multi-site phosphorylation of  
17 Neurogenin 2 coordinates cell cycling with differentiation during  
18 neurogenesis. *Development* **138**: 4267–4277.
- 19 Arber S, Han B, Mendelsohn M, Smith M, Jessell TM, Sockanathan S. 1999.  
20 Requirement for the homeobox gene Hb9 in the consolidation of motor  
21 neuron identity. *Neuron* **23**: 659–674.
- 22 Artavanis-Tsakonas S. 1999. Notch Signaling: Cell Fate Control and Signal  
23 Integration in Development. *Science (80- )* **284**: 770–776.
- 24 Balaskas N, Ribeiro A, Panovska J, Dessaud E, Sasai N, Page KM, Briscoe J,  
25 Ribes V. 2012. Gene regulatory logic for reading the Sonic Hedgehog  
26 signaling gradient in the vertebrate neural tube. *Cell* **148**: 273–284.
- 27 Bertrand N, Castro DS, Guillemot F. 2002. Proneural genes and the  
28 specification of neural cell types. *Nat Rev Neurosci* **3**: 517–530.
- 29 Briscoe J, Ericson J. 1999. The specification of neuronal identity by graded  
30 Sonic Hedgehog signalling. *Semin Cell Dev Biol* **10**: 353–362.
- 31 Briscoe J, Pierani A, Jessell TM, Ericson J. 2000. A homeodomain protein  
32 code specifies progenitor cell identity and neuronal fate in the ventral  
33 neural tube. *Cell* **101**: 435–445.
- 34 Bylund M, Andersson E, Novitsch BG, Muhr J. 2003. Vertebrate neurogenesis  
35 is counteracted by Sox1-3 activity. *Nat Neurosci* **6**: 1162–1168.
- 36 Chamberlain CE, Jeong J, Guo C, Allen BL, McMahon AP. 2008. Notochord-  
37 derived Shh concentrates in close association with the apically positioned  
38 basal body in neural target cells and forms a dynamic gradient during  
39 neural patterning. *Development* **135**: 1097–1106.
- 40 Chen JA, Huang YP, Mazzone EO, Tan GC, Zavadil J, Wichterle H. 2011. Mir-  
41 17-3p controls spinal neural progenitor patterning by regulating Olig2/Irx3  
42 cross-repressive loop. *Neuron* **69**: 721–735.
- 43 Cohen M, Briscoe J, Blassberg R. 2013. Morphogen interpretation: the  
44 transcriptional logic of neural tube patterning. *Curr Opin Genet Dev* **23**:  
45 423–428.
- 46 Cohen M, Page KM, Perez-Carrasco R, Barnes CP, Briscoe J. 2014. A

- 1 theoretical framework for the regulation of Shh morphogen-controlled  
2 gene expression. *Development* **141**: 3868–3878.
- 3 Dasen JS, Liu J-P, Jessell TM. 2003. Motor neuron columnar fate imposed by  
4 sequential phases of Hox-c activity. *Nature* **425**: 926–933.
- 5 Davidson EH. 2010. Emerging properties of animal gene regulatory networks.  
6 *Nature* **468**: 911–920.
- 7 Dessaud E, Ribes V, Balaskas N, Yang LL, Pierani A, Kicheva A, Novitch BG,  
8 Briscoe J, Sasai N. 2010. Dynamic assignment and maintenance of  
9 positional identity in the ventral neural tube by the morphogen sonic  
10 hedgehog. *PLoS Biol* **8**: e1000382.
- 11 Dessaud E, Yang LL, Hill K, Cox B, Ulloa F, Ribeiro A, Mynett A, Novitch BG,  
12 Briscoe J. 2007. Interpretation of the sonic hedgehog morphogen  
13 gradient by a temporal adaptation mechanism. *Nature* **450**: 717–720.
- 14 Ericson J, Thor S, Edlund T, Jessell TM, Yamada T. 1992. Early stages of  
15 motor neuron differentiation revealed by expression of homeobox gene  
16 *Islet-1*. *Science (80- )* **256**: 1555 LP-1560.
- 17 Fior R, Henrique D. 2005. A novel hes5/hes6 circuitry of negative regulation  
18 controls Notch activity during neurogenesis. *Dev Biol* **281**: 318–333.
- 19 Gaber ZB, Butler SJ, Novitch BG. 2013. PLZF regulates fibroblast growth  
20 factor responsiveness and maintenance of neural progenitors. ed. F.  
21 Polleux. *PLoS Biol* **11**: e1001676.
- 22 Gouti M, Tsakiridis A, Wymeersch FJ, Huang Y, Kleinjung J, Wilson V,  
23 Briscoe J. 2014. In vitro generation of neuromesodermal progenitors  
24 reveals distinct roles for wnt signalling in the specification of spinal cord  
25 and paraxial mesoderm identity. *PLoS Biol* **12**: e1001937.
- 26 Hatakeyama J, Bessho Y, Katoh K, Ookawara S, Fujioka M, Guillemot F,  
27 Kageyama R. 2004. Hes genes regulate size, shape and histogenesis of  
28 the nervous system by control of the timing of neural stem cell  
29 differentiation. *Development* **131**: 5539–5550.
- 30 Hindley C, Ali F, McDowell G, Cheng K, Jones A, Guillemot F, Philpott A.  
31 2012. Post-translational modification of Ngn2 differentially affects  
32 transcription of distinct targets to regulate the balance between progenitor  
33 maintenance and differentiation. *Development* **139**: 1718–1723.
- 34 Imayoshi I, Isomura A, Harima Y, Kawaguchi K, Kori H, Miyachi H, Fujiwara T,  
35 Ishidate F, Kageyama R. 2013. Oscillatory control of factors determining  
36 multipotency and fate in mouse neural progenitors. *Science (80- )* **342**:  
37 1203–1208.
- 38 Imayoshi I, Kageyama R. 2014. bHLH factors in self-renewal, multipotency,  
39 and fate choice of neural progenitor cells. *Neuron* **82**: 9–23.
- 40 Ito T, Udaka N, Yazawa T, Okudela K, Hayashi H, Sudo T, Guillemot F,  
41 Kageyama R, Kitamura H. 2000. Basic helix-loop-helix transcription  
42 factors regulate the neuroendocrine differentiation of fetal mouse  
43 pulmonary epithelium. *Development* **127**: 3913–21.
- 44 Jeong J, McMahon AP. 2005. Growth and pattern of the mammalian neural  
45 tube are governed by partially overlapping feedback activities of the  
46 hedgehog antagonists patched 1 and Hhip1. *Development* **132**: 143–154.
- 47 Jessell TM. 2000. Neuronal specification in the spinal cord: inductive signals  
48 and transcriptional codes. *Nat Rev Genet* **1**: 20–29.



- 1 Kageyama R, Ohtsuka T, Kobayashi T. 2007. The Hes gene family:  
2 repressors and oscillators that orchestrate embryogenesis. *Development*  
3 **134**: 1243–1251.
- 4 Kicheva A, Bollenbach T, Ribeiro A, Valle HP, Lovell-Badge R, Episkopou V,  
5 Briscoe J. 2014. Coordination of progenitor specification and growth in  
6 mouse and chick spinal cord. *Science* **345**: 1254927.
- 7 Kong JH, Yang L, Briscoe J, Novitsch BG, Kong JH, Yang L, Dessaud E,  
8 Chuang K, Moore DM, Rohatgi R. 2015. Notch Activity Modulates the  
9 Responsiveness of Neural Progenitors to Sonic Hedgehog Signaling. *Dev*  
10 *Cell* **33**: 373–387.
- 11 Kutejova E, Sasai N, Shah A, Gouti M, Briscoe J. 2016. Neural Progenitors  
12 Adopt Specific Identities by Directly Repressing All Alternative Progenitor  
13 Transcriptional Programs. *Dev Cell* **36**: 639–653.
- 14 Lacomme M, Liaubet L, Pituello F, Bel-Vialar S. 2012. NEUROG2 Drives Cell  
15 Cycle Exit of Neuronal Precursors by Specifically Repressing a Subset of  
16 Cyclins Acting at the G1 and S Phases of the Cell Cycle. *Mol Cell Biol* **32**:  
17 2596–2607.
- 18 Lee SK, Jurata LW, Funahashi J, Ruiz EC, Pfaff SL. 2004. Analysis of  
19 embryonic motoneuron gene regulation: derepression of general  
20 activators function in concert with enhancer factors. *Development* **131**:  
21 3295–3306.
- 22 Lee SK, Lee B, Ruiz EC, Pfaff SL. 2005. Olig2 and Ngn2 function in  
23 opposition to modulate gene expression in motor neuron progenitor cells.  
24 *Genes Dev* **19**: 282–294.
- 25 Lee SK, Pfaff SL. 2001. Transcriptional networks regulating neuronal identity  
26 in the developing spinal cord. *Nat Neurosci* **4 Suppl**: 1183–1191.
- 27 Li H, de Faria JP, Andrew P, Nitarska J, Richardson WD. 2011.  
28 Phosphorylation regulates OLIG2 cofactor choice and the motor neuron-  
29 oligodendrocyte fate switch. *Neuron* **69**: 918–929.
- 30 Li Y, Hibbs MA, Gard AL, Shylo NA, Yun K. 2012. Genome-Wide Analysis of  
31 N1ICD/RBPJ Targets In Vivo Reveals Direct Transcriptional Regulation  
32 of Wnt, SHH, and Hippo Pathway Effectors by Notch1. *Stem Cells* **30**:  
33 741–752.
- 34 Ligon KL, Huillard E, Mehta S, Kesari S, Liu H, Alberta JA, Bachoo RM, Kane  
35 M, Louis DN, DePinho RA, et al. 2007. Olig2-Regulated Lineage-  
36 Restricted Pathway Controls Replication Competence in Neural Stem  
37 Cells and Malignant Glioma. *Neuron* **53**: 503–517.
- 38 Lo L, Dormand E, Greenwood A, Anderson DJ. 2002. Comparison of the  
39 generic neuronal differentiation and neuron subtype specification  
40 functions of mammalian achaete-scute and atonal homologs in cultured  
41 neural progenitor cells. *Development* **129**: 1553–1567.
- 42 Louvi A, Artavanis-Tsakonas S. 2006. Notch signalling in vertebrate neural  
43 development. *Nat Rev Neurosci* **7**: 93–102.
- 44 Lu QR, Sun T, Zhu Z, Ma N, Garcia M, Stiles CD, Rowitch DH. 2002.  
45 Common Developmental Requirement for Olig Function Indicates a Motor  
46 Neuron/Oligodendrocyte Connection. *Cell* **109**: 75–86.
- 47 Lu QR, Yuk D, Alberta J a, Zhu Z, Pawlitzky I, Chan J, McMahon AP, Stiles  
48 CD, Rowitch DH. 2000. Sonic Hedgehog–Regulated Oligodendrocyte

- 1 Lineage Genes Encoding bHLH Proteins in the Mammalian Central  
2 Nervous System. *Neuron* **25**: 317–329.
- 3 Ma YC, Song MR, Park JP, Henry Ho HY, Hu L, Kurtev M V., Zieg J, Ma Q,  
4 Pfaff SL, Greenberg ME. 2008. Regulation of Motor Neuron Specification  
5 by Phosphorylation of Neurogenin 2. *Neuron* **58**: 65–77.
- 6 McDowell GS, Hindley CJ, Lippens G, Landrieu I, Philpott A. 2014.  
7 Phosphorylation in intrinsically disordered regions regulates the activity of  
8 Neurogenin2. *BMC Biochem* **15**: 24.
- 9 Mehta S, Huillard E, Kesari S, Maire CL, Golebiowski D, Harrington EP,  
10 Alberta JA, Kane MF, Theisen M, Ligon KL, et al. 2011. The Central  
11 Nervous System-Restricted Transcription Factor Olig2 Opposes p53  
12 Responses to Genotoxic Damage in Neural Progenitors and Malignant  
13 Glioma. *Cancer Cell* **19**: 359–371.
- 14 Meijer DH, Kane MF, Mehta S, Liu H, Harrington E, Taylor CM, Stiles CD,  
15 Rowitch DH. 2012. Separated at birth? The functional and molecular  
16 divergence of OLIG1 and OLIG2. *Nat Rev Neurosci* **13**: 819–831.
- 17 Meijer DH, Sun Y, Liu T, Kane MF, Alberta JA, Adelmant G, Kupp R, Marto  
18 JA, Rowitch DH, Nakatani Y, et al. 2014. An Amino Terminal  
19 Phosphorylation Motif Regulates Intracellular Compartmentalization of  
20 Olig2 in Neural Progenitor Cells. *J Neurosci* **34**: 8507–8518.
- 21 Mizuguchi R, Sugimori M, Takebayashi H, Kosako H, Nagao M, Yoshida S,  
22 Nabeshima YI, Shimamura K, Nakafuku M. 2001. Combinatorial roles of  
23 Olig2 and Neurogenin2 in the coordinated induction of pan-neuronal and  
24 subtype-specific properties of motoneurons. *Neuron* **31**: 757–771.
- 25 Moris N, Pina C, Arias AM. 2016. Transition states and cell fate decisions in  
26 epigenetic landscapes. *Nat Rev Genet* **17**: 693–703.
- 27 Novitsch BG, Chen AI, Jessell TM. 2001. Coordinate regulation of motor  
28 neuron subtype identity and pan-neuronal properties by the bHLH  
29 repressor Olig2. *Neuron* **31**: 773–789.
- 30 Novitsch BG, Wichterle H, Jessell TM, Sockanathan S. 2003. A requirement for  
31 retinoic acid-mediated transcriptional activation in ventral neural  
32 patterning and motor neuron specification. *Neuron* **40**: 81–95.
- 33 Ohtsuka T, Ishibashi M, Gradwohl G, Nakanishi S, Guillemot F, Kageyama R.  
34 1999. Hes1 and Hes5 as notch effectors in mammalian neuronal  
35 differentiation. *EMBO J* **18**: 2196–2207.
- 36 Oosterveen T, Kurdija S, Ensterö M, Uhde CW, Bergsland M, Sandberg M,  
37 Sandberg R, Muhr J, Ericson J. 2013. SoxB1-driven transcriptional  
38 network underlies neural-specific interpretation of morphogen signals.  
39 *Proc Natl Acad Sci U S A* **110**: 7330–5.
- 40 Philippidou P, Dasen JS. 2013. Hox Genes: Choreographers in Neural  
41 Development, Architects of Circuit Organization. *Neuron* **80**: 12–34.
- 42 Ran FA, Hsu PD, Lin CY, Gootenberg JS, Konermann S, Trevino AE, Scott  
43 DA, Inoue A, Matoba S, Zhang Y, et al. 2013. Double nicking by RNA-  
44 guided CRISPR Cas9 for enhanced genome editing specificity. *Cell* **154**:  
45 1380–1389.
- 46 Rhee HS, Closser M, Guo Y, Bashkurova E V., Tan GC, Gifford DK, Wichterle  
47 H. 2016. Expression of Terminal Effector Genes in Mammalian Neurons  
48 Is Maintained by a Dynamic Relay of Transient Enhancers. *Neuron* 1–14.

- 1 Ribes V, Briscoe J. 2009. Establishing and interpreting graded Sonic  
2 Hedgehog signaling during vertebrate neural tube patterning: the role of  
3 negative feedback. *Cold Spring Harb Perspect Biol* **1**: a002014.
- 4 Sagner A, Briscoe J. 2017. Morphogen interpretation: concentration, time,  
5 competence, and signaling dynamics. *Wiley Interdiscip Rev Dev Biol*  
6 e271.
- 7 Samanta J, Kessler JJA. 2004. Interactions between ID and OLIG proteins  
8 mediate the inhibitory effects of BMP4 on oligodendroglial differentiation.  
9 *Development* **131**: 4131–4142.
- 10 Sasai N, Kutejova E, Briscoe J. 2014. Integration of signals along orthogonal  
11 axes of the vertebrate neural tube controls progenitor competence and  
12 increases cell diversity. *PLoS Biol* **12**: e1001907.
- 13 Scardigli R, Schuurmans C, Gradwohl G, Guillemot F. 2001. Crossregulation  
14 between Neurogenin2 and Pathways Specifying Neuronal Identity in the  
15 Spinal Cord. *Neuron* **31**: 203–217.
- 16 Scialdone A, Tanaka Y, Jawaid W, Moignard V, Wilson NK, Macaulay IC,  
17 Marioni JC, Göttgens B. 2016. Resolving early mesoderm diversification  
18 through single-cell expression profiling. *Nature* 1–22.
- 19 Seibt J, Schuurmans C, Gradwohl G, Dehay C, Vanderhaeghen P, Guillemot  
20 F. 2003. Neurogenin2 Specifies the Connectivity of Thalamic Neurons by  
21 Controlling Axon Responsiveness to Intermediate Target Cues. *Neuron*  
22 **39**: 439–452.
- 23 Selkoe D, Kopan R. 2003. Notch and Presenilin: regulated intramembrane  
24 proteolysis links development and degeneration. *Annu Rev Neurosci* **26**:  
25 565–97.
- 26 Setoguchi T, Kondo T. 2004. Nuclear export of OLIG2 in neural stem cells is  
27 essential for ciliary neurotrophic factor-induced astrocyte differentiation. *J*  
28 *Cell Biol* **166**: 963–8.
- 29 Setty M, Tadmor MD, Reich-zeliger S, Angel O, Salame TM, Kathail P, Choi  
30 K, Bendall S, Friedman N, Pe D. 2016. Articles Wishbone identifies  
31 bifurcating developmental trajectories from single-cell data. *Nat*  
32 *Biotechnol* **34**: 614–637.
- 33 Shcherbo D, Murphy CS, Ermakova G V, Solovieva E a, Chepurnykh T V,  
34 Shcheglov AS, Verkhusha V V, Pletnev VZ, Hazelwood KL, Roche PM, et  
35 al. 2009. Far-red fluorescent tags for protein imaging in living tissues.  
36 *Biochem J* **418**: 567–574.
- 37 Shimojo H, Isomura A, Ohtsuka T, Kori H, Miyachi H, Kageyama R. 2016.  
38 Oscillatory control of Delta-like1 in cell interactions regulates dynamic  
39 gene expression and tissue morphogenesis. *Genes Dev* **30**: 102–116.
- 40 Shimojo H, Ohtsuka T, Kageyama R. 2011. Dynamic expression of notch  
41 signaling genes in neural stem/progenitor cells. *Front Neurosci* **5**: 78.
- 42 Shimojo H, Ohtsuka T, Kageyama R. 2008. Oscillations in Notch Signaling  
43 Regulate Maintenance of Neural Progenitors. *Neuron* **58**: 52–64.
- 44 Shin J, Berg DA, Christian KM, Shin J, Berg DA, Zhu Y, Shin JY, Song J,  
45 Bonaguidi MA. 2015. Single-Cell RNA-Seq with Waterfall Reveals  
46 Molecular Cascades underlying Adult Neurogenesis Resource Single-  
47 Cell RNA-Seq with Waterfall Reveals Molecular Cascades underlying  
48 Adult Neurogenesis. *Stem Cell* **17**: 360–372.

- 1 Skaggs K, Martin DM, Novitch BG. 2011. Regulation of spinal interneuron  
2 development by the Olig-related protein Bhlhb5 and Notch signaling.  
3 *Development* **138**: 3199–3211.
- 4 Son EY, Ichida JK, Wainger BJ, Toma JS, Rafuse VF, Woolf CJ, Eggan K.  
5 2011. Conversion of mouse and human fibroblasts into functional spinal  
6 motor neurons. *Cell Stem Cell* **9**: 205–218.
- 7 Stasiulewicz M, Gray SD, Mastromina I, Silva JC, Bjorklund M, Seymour PA,  
8 Booth D, Thompson C, Green RJ, Hall EA, et al. 2015. A conserved role  
9 for Notch signaling in priming the cellular response to Shh through ciliary  
10 localisation of the key Shh transducer Smo. *Development* **142**: 2291–  
11 2303.
- 12 Stathopoulos A, Levine M. 2005. Genomic regulatory networks and animal  
13 development. *Dev Cell* **9**: 449–462.
- 14 Stifani N. 2014. Motor neurons and the generation of spinal motor neuron  
15 diversity. *Front Cell Neurosci* **8**: 293.
- 16 Sugimori M, Nagao M, Bertrand N, Parras CM, Guillemot F, Nakafuku M.  
17 2007. Combinatorial actions of patterning and HLH transcription factors in  
18 the spatiotemporal control of neurogenesis and gliogenesis in the  
19 developing spinal cord. *Development* **134**: 1617–29.
- 20 Sun Y, Meijer DH, Alberta JA, Mehta S, Kane MF, Tien AC, Fu H, Petryniak  
21 MA, Potter GB, Liu Z, et al. 2011. Phosphorylation state of Olig2  
22 regulates proliferation of neural progenitors. *Neuron* **69**: 906–917.
- 23 Szymczak AL, Workman CJ, Wang Y, Vignali KM, Dilioglou S, Vanin EF,  
24 Vignali DA. 2004. Correction of multi-gene deficiency in vivo using a  
25 single “self-cleaving” 2A peptide-based retroviral vector. *Nat Biotechnol*  
26 **22**: 589–594.
- 27 Takebayashi H, Nabeshima Y, Yoshida S, Chisaka O, Ikenaka K, Nabeshima  
28 YI. 2002. The basic helix-loop-helix factor Olig2 is essential for the  
29 development of motoneuron and oligodendrocyte lineages. *Curr Biol* **12**:  
30 1157–1163.
- 31 Takebayashi K, Sasai Y, Sakai Y, Watanabe T, Nakanishi S, Kageyama R.  
32 1994. Structure, chromosomal locus, and promoter analysis of the gene  
33 encoding the mouse helix-loop-helix factor HES-1. Negative  
34 autoregulation through the multiple N box elements. *J Biol Chem* **269**:  
35 5150–5156.
- 36 Tan GC, Mazzoni EO, Wichterle H. 2016. Iterative Role of Notch Signaling in  
37 Spinal Motor Neuron Diversification. *Cell Rep* **16**: 907–916.
- 38 Tanabe Y, William C, Jessell TM. 1998. Specification of motor neuron identity  
39 by the MNR2 homeodomain protein. *Cell* **95**: 67–80.
- 40 Thaler JP, Koo SJ, Kania A, Lettieri K, Andrews S, Cox C, Jessell TM, Pfaff  
41 SL. 2004. A Postmitotic Role for Isl-Class LIM Homeodomain Proteins in  
42 the Assignment of Visceral Spinal Motor Neuron Identity. *Neuron* **41**:  
43 337–350.
- 44 Trapnell C, Cacchiarelli D, Grimsby J, Pokharel P, Li S, Morse M, Lennon NJ,  
45 Livak KJ, Mikkelsen TS, Rinn JL. 2014. The dynamics and regulators of  
46 cell fate decisions are revealed by pseudotemporal ordering of single  
47 cells. *Nat Biotechnol* **32**: 381–386.
- 48 Treutlein B, Lee QY, Camp JG, Mall M, Koh W, Ali S, Shariati M, Sim S, Neff

- 1 NF, Skotheim JM, et al. 2016. Dissecting direct reprogramming from  
2 fibroblast to neuron using single-cell RNA-seq. *Nature* **534**: 391–395.
- 3 Velasco S, Ibrahim MM, Kakumanu A, Garipler G, Aydin B, Al-Sayegh MA,  
4 Hirsekorn A, Abdul-Rahman F, Satija R, Ohler U, et al. 2016. A Multi-step  
5 Transcriptional and Chromatin State Cascade Underlies Motor Neuron  
6 Programming from Embryonic Stem Cells. *Cell Stem Cell*.
- 7 Xiang C, Baubet V, Pal S, Holderbaum L, Tatard V, Jiang P, Davuluri R V,  
8 Dahmane N. 2011. RP58 / ZNF238 directly modulates proneurogenic  
9 gene levels and is required for neuronal differentiation and brain  
10 expansion. *Cell Death Differ* **19**: 692–702.
- 11 Zhou J, Tien A-C, Alberta JA, Ficarro SB, Griveau A, Sun Y, Deshpande JS,  
12 Card JD, Morgan-Smith M, Michowski W, et al. 2017. A Sequentially  
13 Priming Phosphorylation Cascade Activates the Gliomagenic  
14 Transcription Factor Olig2. *Cell Rep* **18**: 3167–3177.
- 15 Zhou Q, Anderson DJ. 2002. The bHLH transcription factors OLIG2 and  
16 OLIG1 couple neuronal and glial subtype specification. *Cell* **109**: 61–73.
- 17  
18

1 **MAIN TEXT FIGURES + LEGENDS**

2

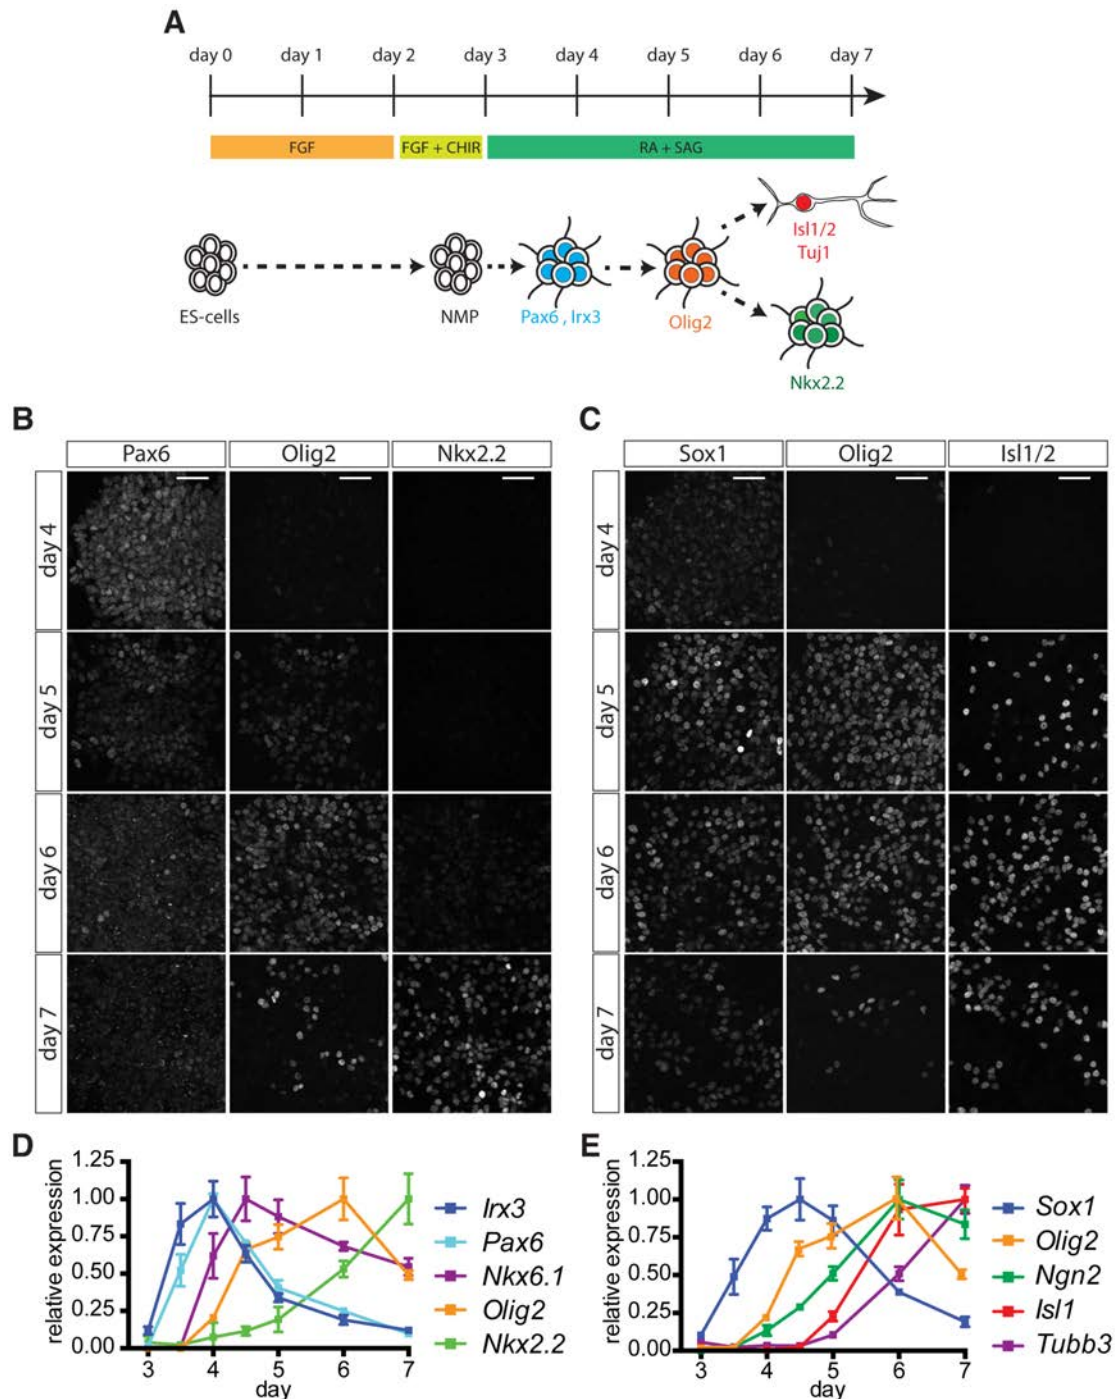

3

4 **Fig 1. Characterization of MN differentiation from ESCs**

5 (A) Scheme outlining the differentiation protocol. ESCs are plated in N2B27 +  
6 FGF for two days, before being exposed to N2B27 + FGF/CHIR, resulting in  
7 the production of neuromesodermal progenitors (NMPs) at day 3. Cells are  
8 subsequently exposed to retinoic acid (RA) and SAG to promote  
9 differentiation into ventral NPs and MNs.

10 (B, C) Expression of NP (*Pax6*, *Olig2*, *Nkx2.2*, *Sox1*) and MN (*Isl1/2*) markers  
11 between day 4 to day 7 in differentiating ESCs.

- 1 (D) RT-qPCR analysis of *Irx3*, *Pax6*, *Nkx6.1*, *Olig2* and *Nkx2.2* expression
- 2 from day 3 to day 7 reveals progressive ventralization in response to
- 3 increasing duration of Shh signaling.
- 4 (E) MN induction after day 5 revealed by RT-qPCR analysis of *Sox1*, *Ngn2*,
- 5 *Isl1* and *Tubb3*.
- 6 Scale bars = 40  $\mu$ m.
- 7

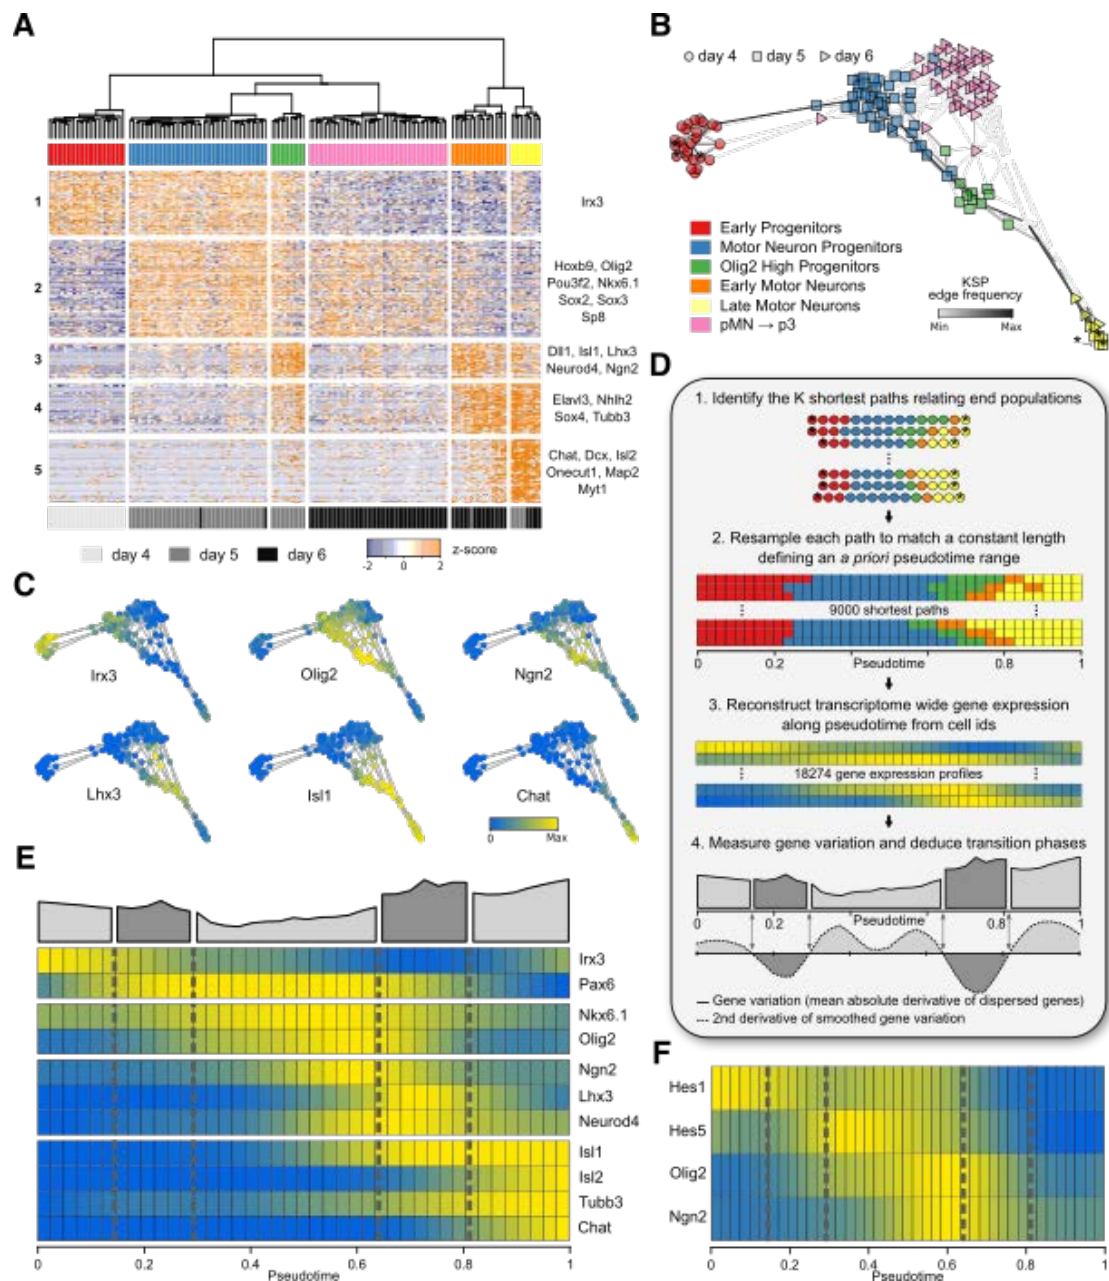

1  
2 **Fig 2. Reconstruction of transcriptional changes during MN**  
3 **differentiation**

4 (A) Identification of NP cell states using hierarchical clustering of gene  
5 expression profiles of the individual cells

6 (B) Cell state graph constructed from minimum spanning trees, color coded  
7 for the cell populations identified in Fig 2A. Stars indicate start and end cells  
8 for the reconstruction of transcriptional changes along pseudotime. Shading of  
9 edges between cells indicates how often the edge was used in the  
10 reconstruction of gene expression along pseudotime (see Analytical  
11 Supplement).

12 (C) Cell state graph color coded for expression levels of *Irx3*, *Olig2*, *Ngn2*,  
13 *Lhx3*, *Isl1* and *Chat*.



1 (D) Inferred changes in gene expression over pseudotime from 9000 shortest  
2 paths connecting start and end cells (stars in B). Each shortest path was  
3 resampled to a length of 41 pseudo-timepoints to enable statistical  
4 measurements of gene expression. Cell IDs color coded according to cell  
5 states in A. Quantification of the global rate of change in gene expression  
6 identifies three metastable states (light gray) separated by transition states  
7 during which the rate of change in gene expression is increased (dark gray).  
8 Transition phases are defined as intervals along the pseudo-temporal timeline  
9 at which the second derivative of the global gene variation is negative, while  
10 metastable states are characterized by a positive second derivative.

11 (E) Gene expression profiles along pseudotime for NP TFs (*Irx3*, *Pax6*,  
12 *Nkx6.1* and *Olig2*), gene associated with the transition to MNs (*Ngn2*, *Lhx3*  
13 and *Neurod4*) and MN markers (*Isl1/2*, *Tubb3* and *Chat*).

14 (F) Levels of gene expression for *Hes1/5*, *Olig2* and *Ngn2* over pseudotime.  
15 Note that *Olig2* expression appears biphasic with upregulation of *Olig2*  
16 concomitant to *Ngn2* induction and repression of *Hes1/5* in the transition  
17 phase from NP to MN.  
18

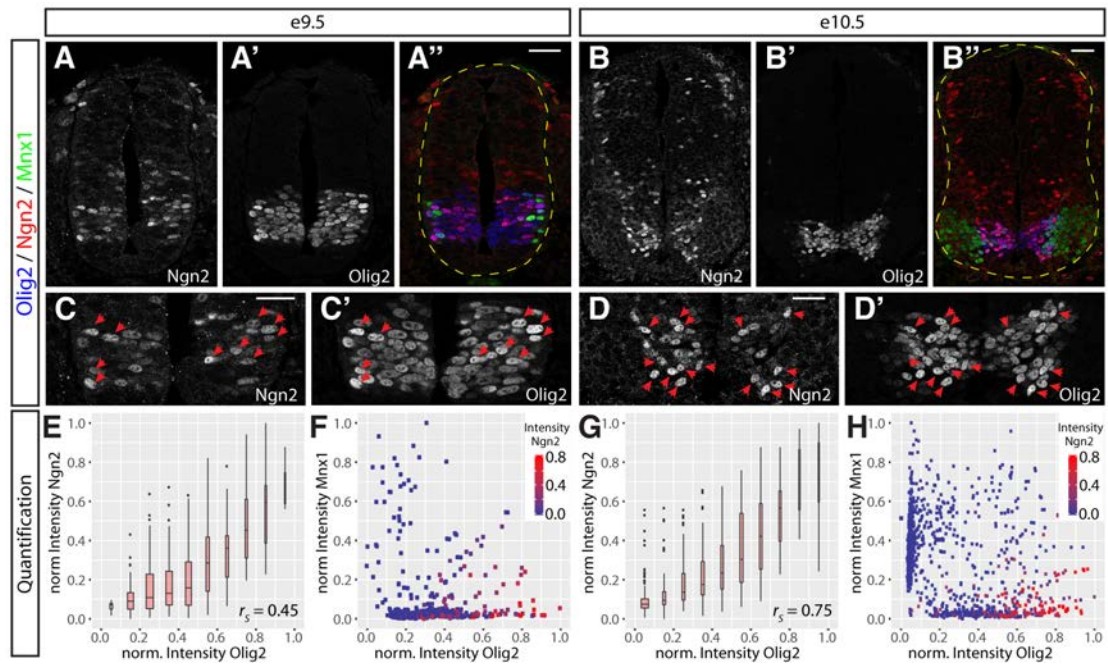

1

2

3 **Fig 3. Olig2 expression is higher in Ngn2 expressing progenitors in the**  
4 **pMN domain**

5 (A-B'') Staining for Ngn2 (A, B), Olig2 (A', B') merged with Mnx1 (green in A'',  
6 B'') in spinal cords at e9.5 (A-A'') and e10.5 (B-B'').

7 (C-D') Higher magnification images of the spinal cords shown in (A-B''). Red  
8 arrowheads indicate nuclei with elevated levels of Ngn2 and Olig2.

9 (E, G) Positive correlation between Olig2 and Ngn2 protein levels in individual  
10 nuclei at e9.5 (E, n = 464 nuclei) and e10.5 (G, n = 1078 nuclei).

11 (F, H) Levels of Olig2, Mnx1 and Ngn2 in individual nuclei throughout the pMN  
12 domain at e9.5 (F) and e10.5 (H). Plotting Olig2 versus Mnx1 protein levels  
13 reveals a clear differentiation trajectory from Olig2-positive pMN cells to  
14 Mnx1-positive MNs. Note that high levels of Ngn2 are only observed in cells  
15 with high levels of Olig2 expression. In addition Olig2 protein perdures much  
16 longer in Mnx1 positive MNs than Ngn2.

17 Scale bars = 50 μm.

18

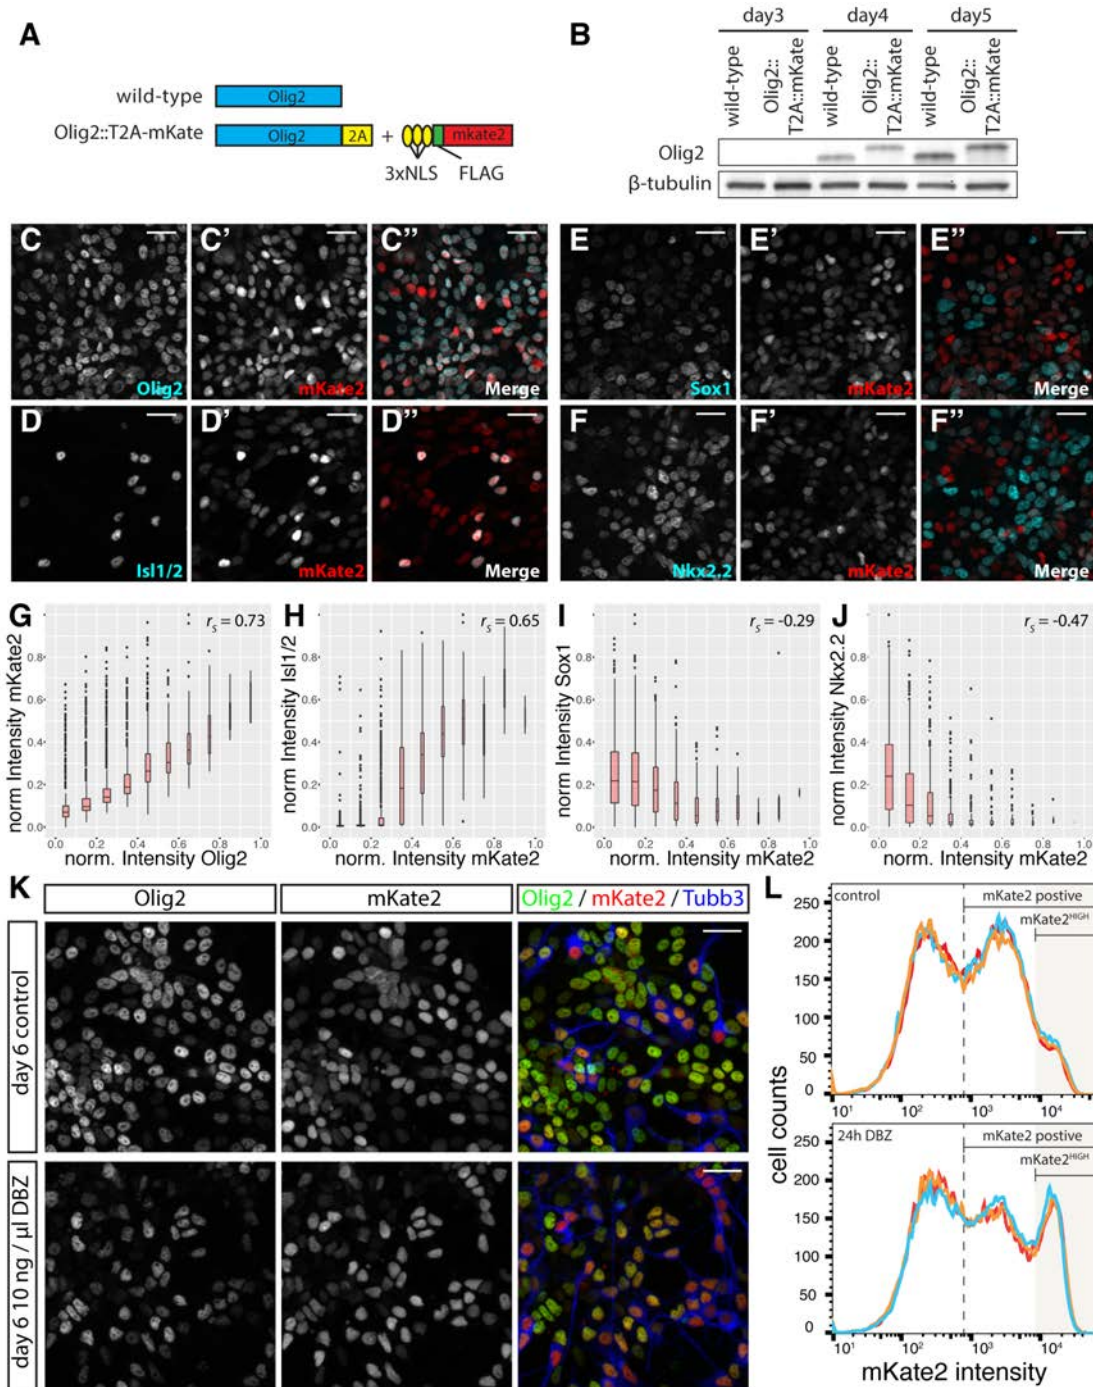

**Fig 4. Quantification of a fluorescent Olig2 reporter reveals a marked upregulation of Olig2 prior to MN differentiation**

(A) Design of the Olig2-mKate2 reporter. A 3xNLS-FLAG-mKate2 reporter was fused to the C-terminus of endogenous Olig2 via a T2A self-cleaving peptide.

(B) Western Blot analysis reveals that the targeted allele shows the same expression dynamics and levels as endogenous Olig2. The targeted allele runs at slightly increased molecular weight due to addition of the T2A peptide

- 1 (see A). Note that both alleles are targeted in this cell line and consequently  
2 no protein of wild-type size was detected.
- 3 (C-F'') Immunofluorescence for mKate2 with Olig2 (C-C''), Isl1/2 (D-D''), Sox1  
4 (E-E'') and Nkx2.2 (F-F'') at day 6 of the differentiations.
- 5 (G-J) Quantification of protein levels of mKate2 and Olig2 (G, n = 2851  
6 nuclei), Isl1/2 (H, same dataset as G), Sox1 (I, n = 2049 nuclei) and Nkx2.2  
7 (J, n = 2034 nuclei) in individual nuclei. Note the positive correlation between  
8 mKate2 and Olig2 and Isl1/2, and negative correlation between mKate2 and  
9 Sox1 and Nkx2.2.
- 10 (K) Inhibition of Notch signaling using 10 ng/ $\mu$ l DBZ causes an increase of  
11 neurogenesis. Immunofluorescent staining for Olig2, mKate2 and Tubb3 in  
12 control or after 24 hours DBZ treatment at day 6 of the differentiation.
- 13 (L) Frequency plots of mKate2 fluorescence intensity obtained by flow  
14 cytometry reveal a strong increase in the number of mKate2<sup>HIGH</sup> cells after 24  
15 hours DBZ treatment.
- 16 Scale bars = 25  $\mu$ m.
- 17

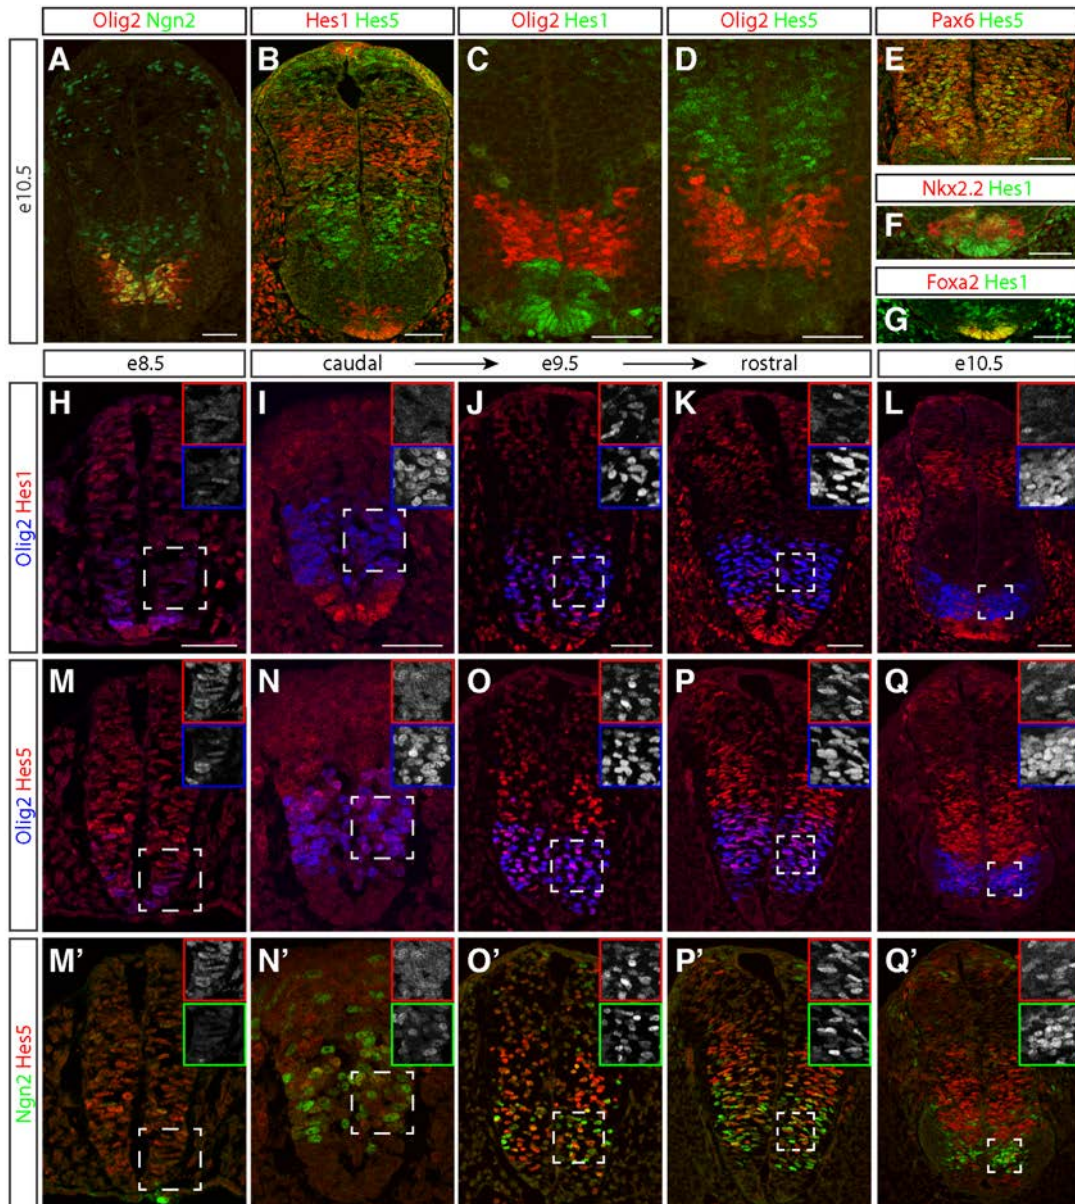

1

2

3 **Fig 5. Olig2 and Hes are dynamically expressed in the mouse neural**  
4 **tube**

5 (A-D) Expression patterns of Ngn2 (green in A), Olig2 (red in A,C,D), Hes1  
6 (red in B, green in C) and Hes5 (green in B,D) in the neural tube at e10.5.  
7 Note the low expression levels of Hes1/5 and high expression levels of Ngn2  
8 in the pMN domain (compare A,B).

9 (E) Hes5 (green) expression coincides with the expression of high levels of  
10 Pax6 (red) in the intermediate neural tube.

11 (F,G) Hes1 expression (green) is readily detected in both Nkx2.2<sup>+</sup> p3  
12 progenitors (red in F) and floor plate cells labelled by Foxa2 expression (red in  
13 G)

1 (H-Q') Time course of Olig2 (blue), Hes1 (red), Hes5 (red), and Ngn2 (green)  
2 expression in neural tubes between e8.5 and e10.5. Multiple panels shown for  
3 e9.5 reflect developmental progression from caudal to rostral positions along  
4 the neuraxis. Hes1 expression appears to recede from the ventral neural tube  
5 upon the onset of Olig2 expression at e8.5 (H) and is thereafter absent from  
6 most Olig2+ cells (I-L). Olig2 and Hes5 are initially coexpressed (M,N). Over  
7 time, Hes5 expression progressively disappears from the pMN domain (N-Q),  
8 and Ngn2 concomitantly increases (N'-Q'). Insets show single channel images  
9 of the outlined area for the respective markers.

10 Scale bars = 50  $\mu$ m.

11

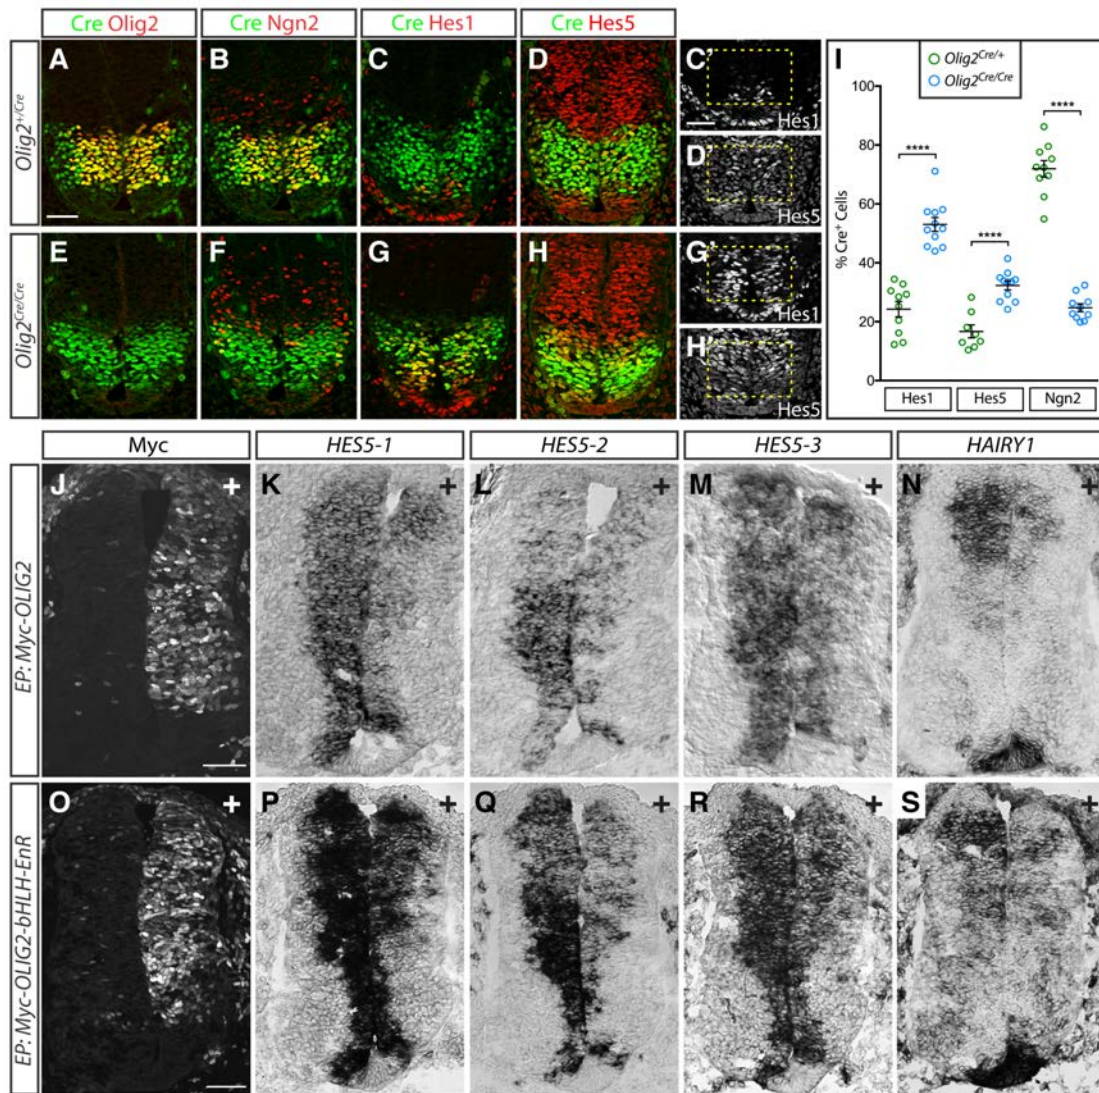

1  
2  
3 **Fig 6. Repression of Hes1/5 in the pMN domain depends on Olig2**  
4 **activity**

5 (A-D) Expression of Cre (green in A-D), Olig2 (red in A), Ngn2 (red in B),  
6 Hes1 (red in C, grey in C') and Hes5 (red in D, grey in D') in e10.5 *Olig2<sup>Cre</sup>*  
7 heterozygous embryos.

8 (E-H) In *Olig2<sup>Cre/Cre</sup>* homozygous mutants, Hes1 expands dorsally (G, G') and  
9 Hes5 ventrally (H, H') into the pMN domain, marked by Cre expressed from  
10 the *Olig2* locus. The expansion of Hes1/5 coincides with a loss of the high  
11 levels of Ngn2 normally seen in the pMN domain.

12 (I) Quantification of Hes1, Hes5 and Ngn2 expression in *Olig2<sup>Cre</sup>*  
13 heterozygous and homozygous embryos. The overlap between Cre and  
14 Hes1/5 significantly increases in *Olig2<sup>Cre</sup>* homozygotes while overlap between  
15 Ngn2 and Cre is strongly reduced. Plot shows the mean  $\pm$  SEM from multiple  
16 sections collected from 3 to 5 embryos for each group. Each section is  
17 represented by a single dot with  $n = 8-11$  for each group. \*\*\*\*  $p < 0.0001$ ,  
18 unpaired t-test.

1 (J-S) Electroporation of myc-tagged OLIG2 and an OLIG2-bHLH-Engrailed  
2 repressor domain fusion protein in chick neural tubes represses expression of  
3 the Hes5 homologues *HES5-1* to *HES5-3* (K-M; Q-R) and the Hes1  
4 homologue *HAIKY1* (N, S). '+' indicates transfected side of the spinal cords.  
5 Results are representative of > 5 successfully transfected embryos collected  
6 from two or more experiments.  
7 Scale bars = 50  $\mu$ m.  
8



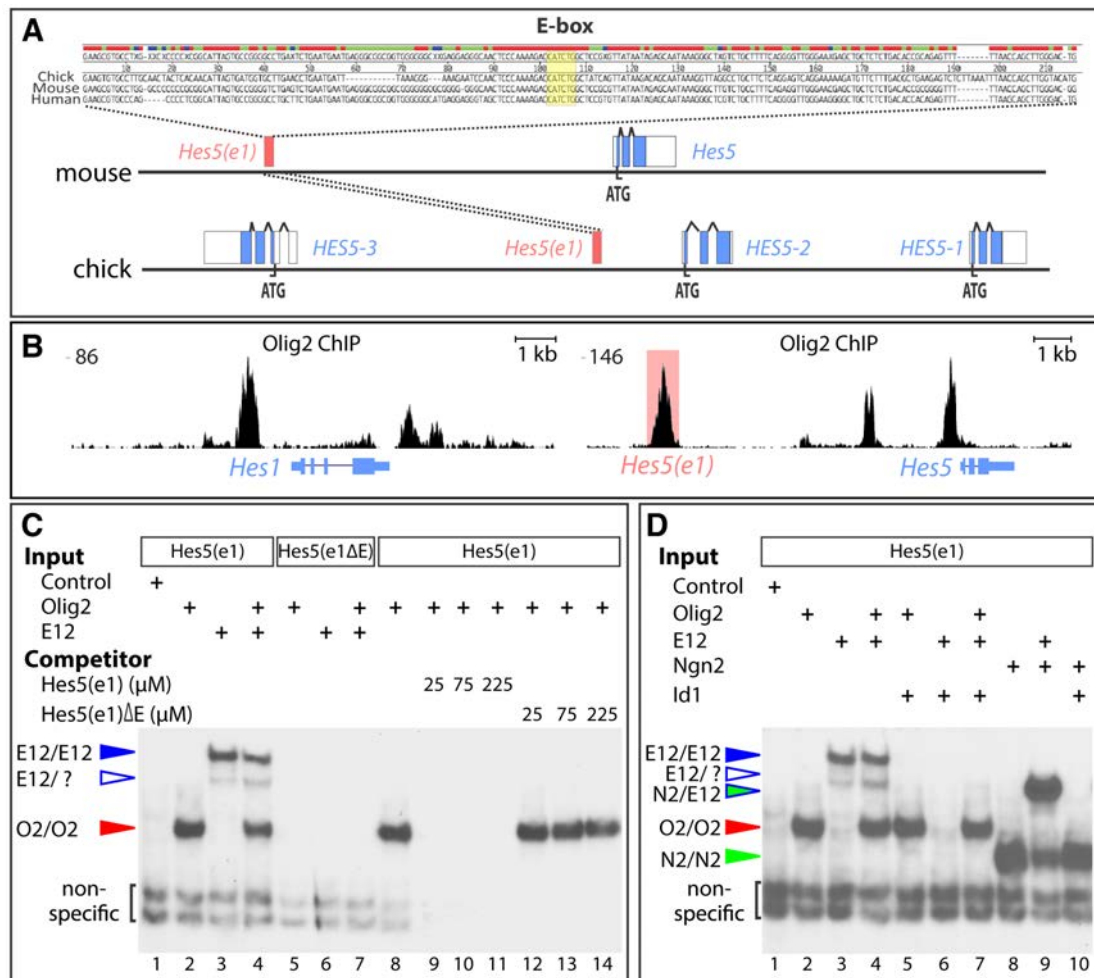

### Fig 7. Olig2 binds to an evolutionary conserved element near Hes5

(A) Identification of an evolutionary conserved element containing an E-box in the vicinity of the *Hes5* genomic locus in chick, mouse and human (*Hes5(e1)*).

(B) Analysis of Olig2 ChIP-Seq data from Kutejova et al. 2016 reveals Olig2 binding sites in the vicinity of the *Hes1* and *Hes5* genes. The peak corresponding to the *Hes5(e1)* element is highlighted in red.

(C) Electrophoretic mobility shift assays show that both Olig2 and E12 homodimers can individually bind to the *Hes5(e1)* E-box, and do not form any heterodimeric complexes (lanes 1-4). Positions of the different protein complexes are indicated by colored arrows. Binding depends on the E-box as both proteins fail to bind probes containing an E-box mutation (*Hes5(e1)ΔE*) (lanes 5-7). Olig2 binding to *Hes5(e1)* can be abolished by the addition of unlabelled *Hes5(e1)* probes, but not those containing the E-box mutation (lanes 8-14).

(D) Id1 inhibits binding of E12, but not of Olig2 or Ngn2, to the *Hes5(e1)* element. Olig2, E12 and Ngn2 alone or Ngn2/E12 heterodimers can bind the *Hes5(e1)* element. Mixing Olig2 or Ngn2 with Id1 does not inhibit their homodimeric binding activities (lanes 2, 5, 8, and 10). In contrast, Id1 strongly

- 1 inhibits binding of both E12/E12 and Ngn2/E12 complexes (lanes 6 and 10).
- 2 The addition of E12 without and with Id1 does not affect Olig2 binding
- 3 efficiency (lanes 2, 4, and 7).
- 4

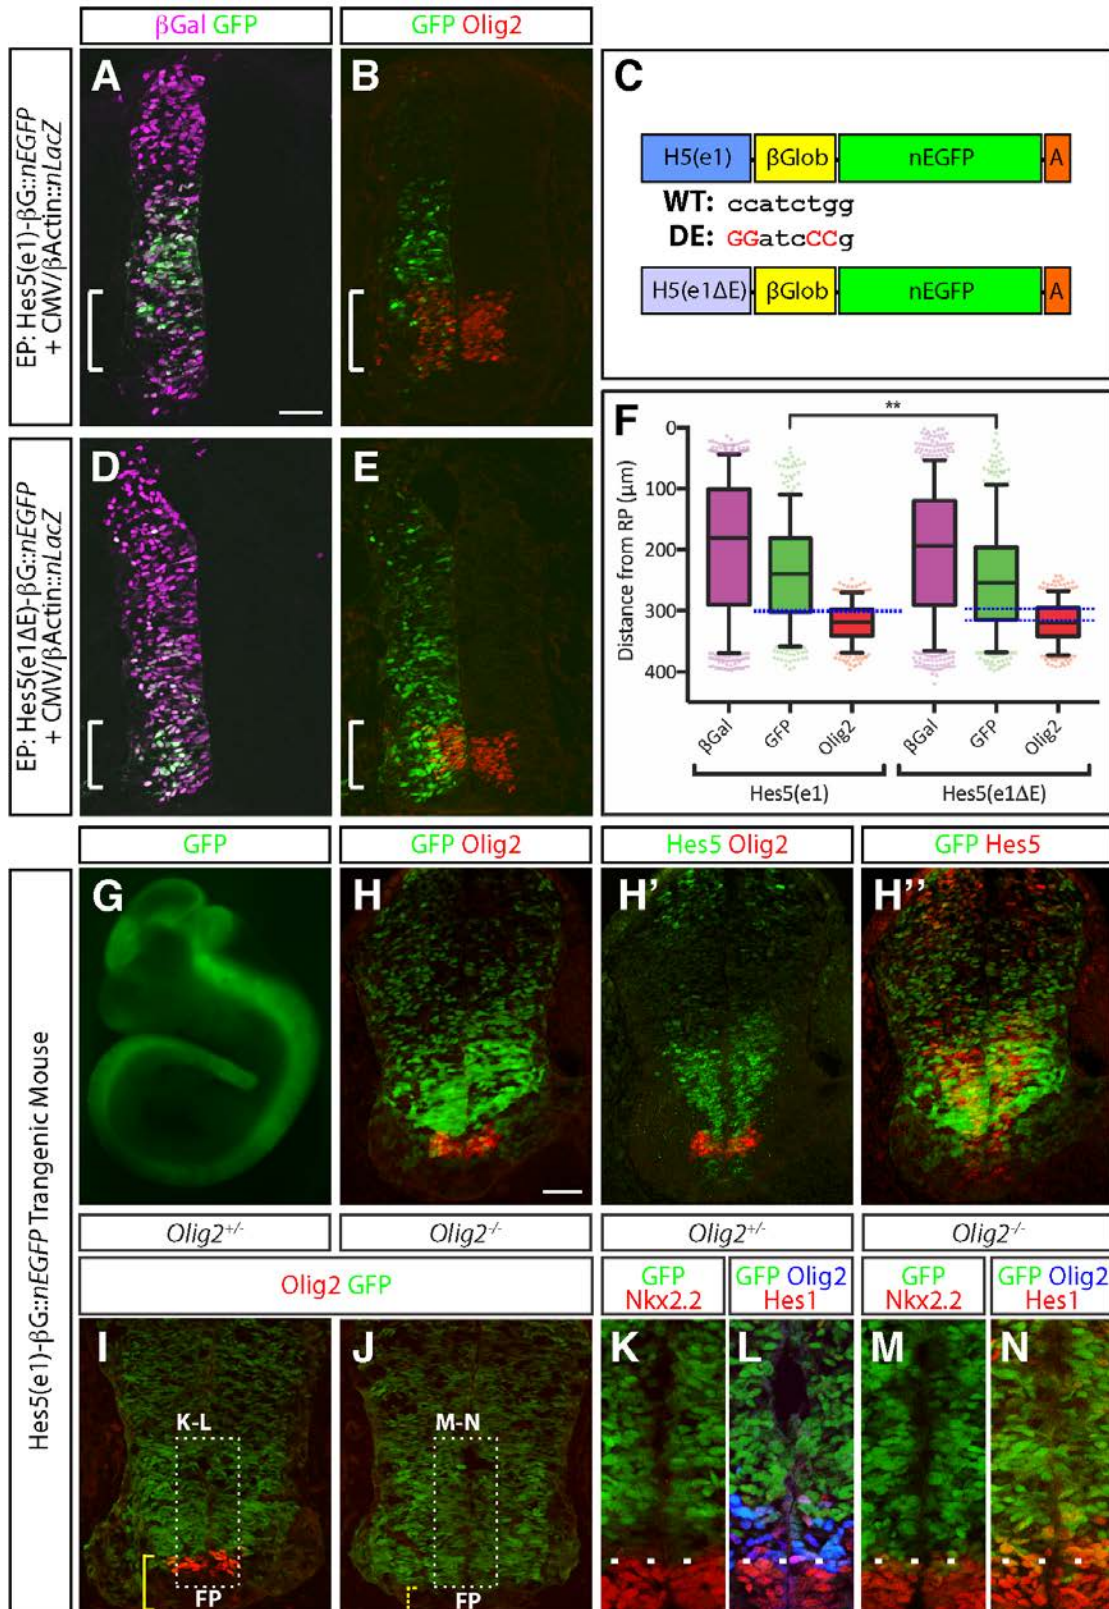

1

2

3 **Fig 8. The Hes5(e1) element is required for repression of reporter genes**  
 4 **in the pMN domain**

5 (A,B) Co-electroporation of CMV/ $\beta$ -actin::nLacZ and Hes5(e1) reporter  
 6 plasmids into chick spinal cord. Although electroporation (revealed by  $\beta$ -Gal

1 staining, magenta in A) is uniform along the dorsal-ventral axis, expression of  
2 the EGFP-reporter is confined to intermediate parts of neural tube (A,B) and  
3 little coexpression of Olig2 and EGFP was detected (B).  
4 (C) Design of Hes5(e1) and Hes5(e1ΔE) reporters. The Hes5(e1) element  
5 was cloned in front of β-globin minimal promoter to drive *EGFP* reporter gene  
6 expression. To test the importance of the E-box in the Hes5(e1) element,  
7 critical base pairs for Olig2 binding were mutated (red).  
8 (D,E) Co-electroporation of CMV/β-actin::nLacZ and Hes5(e1ΔE) reporter  
9 plasmids into chick spinal cord. In contrast to the Hes5(e1) reporter plasmid,  
10 significant coexpression of Olig2 and GFP in the pMN domain is detected (E).  
11 Note that E box mutation reduced the basal activity of the reporter, such that  
12 longer exposure times were needed to achieve the signals levels seen in the  
13 intermediate spinal cord with the nonmutated Hes5(e1) reporter (Fig S8B,C).  
14 (F) Scatter dot plots display the dorsal-ventral positions (distance from the  
15 roof plate) of individual cells expressing the Hes5(e1) and Hes5(e1ΔE)  
16 reporters relative to CMV/β-actin::nLacZ and Olig2. Results are aggregated  
17 from five representative sections taken from five well-electroporated and  
18 stage-matched spinal cords. The Hes5(e1ΔE) reporter exhibits a significant  
19 ventral shift in its activity and considerable overlap with Olig2 expression (blue  
20 dotted box). Lines and error bars indicate mean and interquartile ranges,  
21 respectively. \*\*\*  $p = 0.0005$ , Mann-Whitney test; ns, not significant,  $p =$   
22  $0.6649$ .  
23 (G) EGFP-expression in Hes5(e1)-nEGFP whole mount embryos at e10.5.  
24 (H-H'') Cryosections of Hes5(e1)-nEGFP embryos at e10.5 assayed for GFP,  
25 Olig2 and Hes5. EGFP expression colocalizes with Hes5 expression (H''), but  
26 not with Olig2 (H).  
27 (I-P) Hes5(e1)-nEGFP expression in *Olig2* heterozygous (I,K,L) and  
28 homozygous mutants (J,M,N). In *Olig2* heterozygotes, little nEGFP  
29 expression can be detected in the Olig2 expression domain, resulting in a  
30 pronounced gap between the expression domains of EGFP, Nkx2.2 and Hes1  
31 (K,L). By contrast, the EGFP, Nkx2.2 and Hes1 expression domains directly  
32 abut each other in *Olig2* homozygous mutants (M,N).  
33

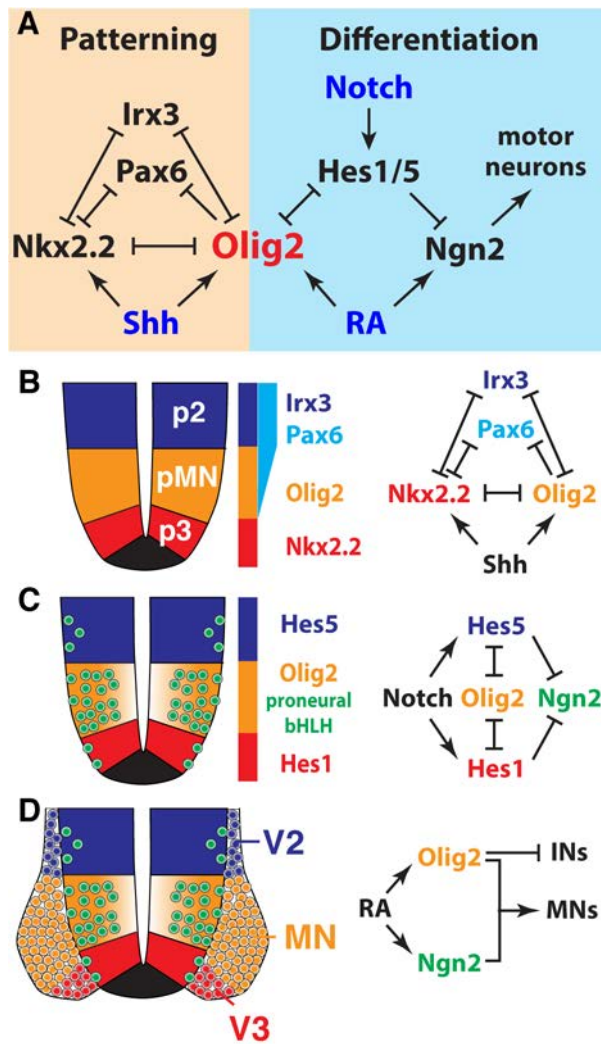

1  
2  
3  
4  
5  
6  
7  
8  
9  
10  
11  
12  
13  
14  
15  
16  
17

### Fig 9. Olig2 coordinates patterning and neuronal differentiation

(A) Proposed model of the Olig2-controlled gene regulatory network. Olig2 does not only act as central organizer for dorsal-ventral patterning in the spinal cord, but also controls the rate of MN differentiation through direct repression of Hes TFs. This leads to a higher levels of Ngn2 expression and consequently a higher rate of neuronal differentiation in the pMN domain compared to adjacent progenitor domains.

(B) Olig2 is a core component of the Shh-controlled gene regulatory network that patterns the ventral spinal cord (Balaskas et al. 2012; Cohen et al. 2014).

(C) Olig2-mediated downregulation of the Notch effectors Hes1/5 relieves repression of Ngn2 in the pMN domain.

(D) Consolidated activities of Ngn2 and Olig2 cause differentiation of NPs to MNs. Olig2 promotes differentiation of MNs through repression of alternative interneuron (IN) cell fates.

1 **SUPPLEMENTAL FIGURES + LEGENDS**

2

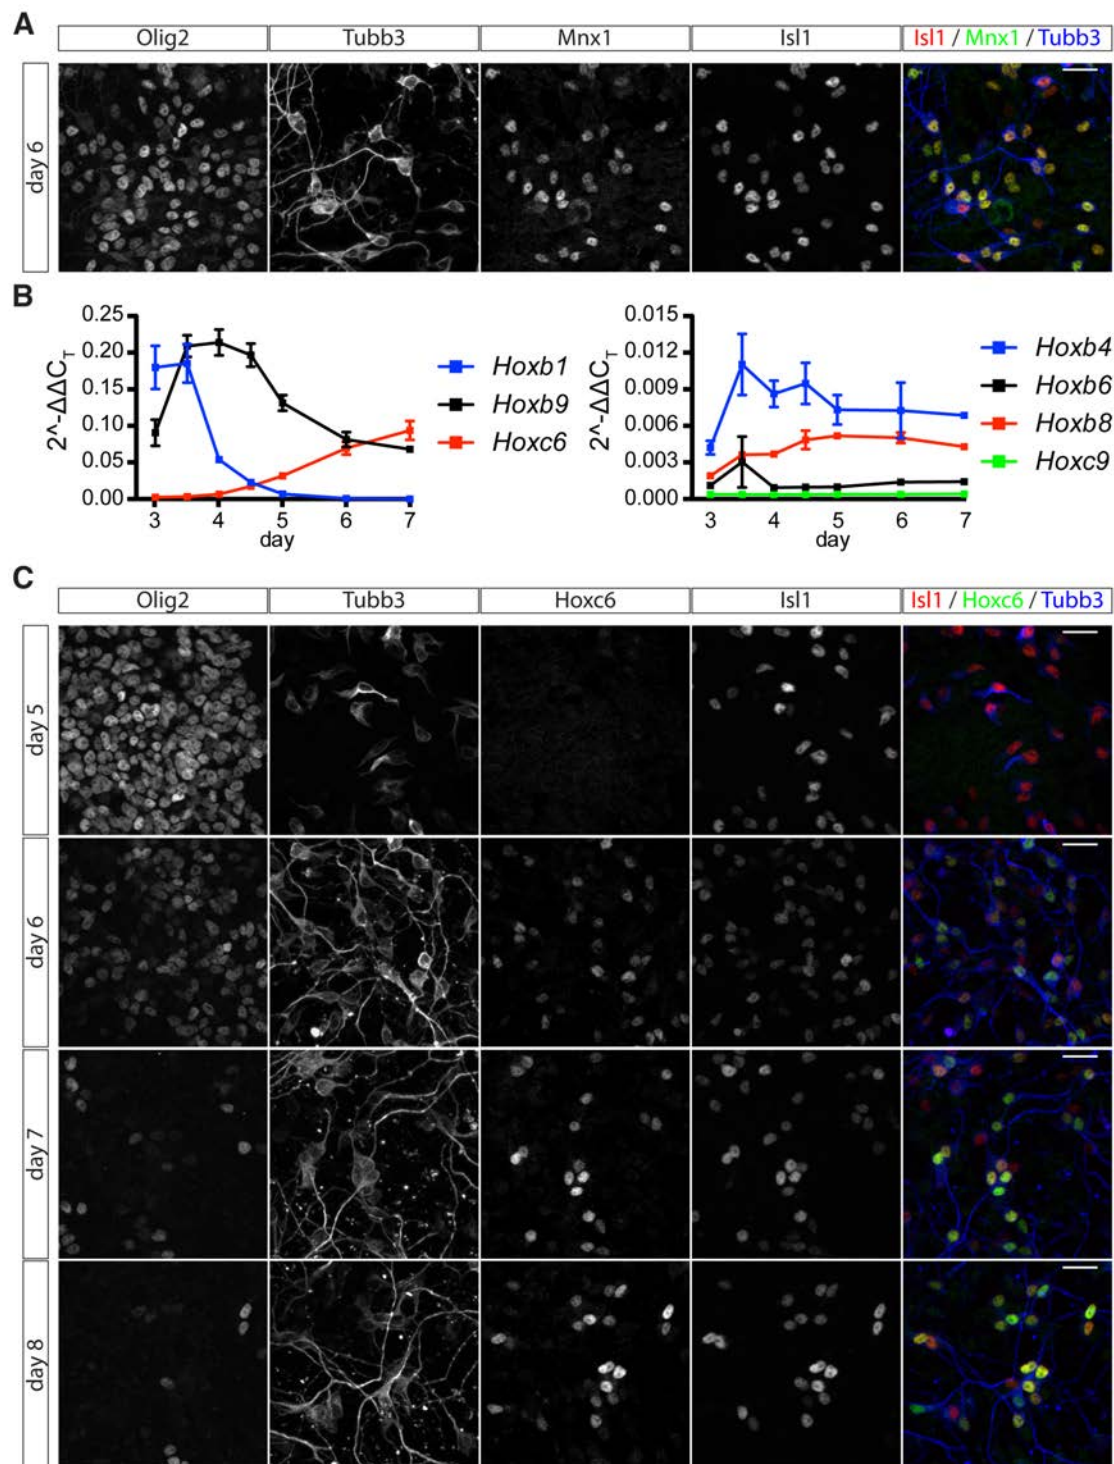

3

4 **Fig S1. Characterization of Hox gene expression in NPs and MNs**

5 (A) Expression of the somatic MN marker Mnx1 in MNs at day 6.

6 (B) RT-qPCR analysis of *Hox* genes expression levels from day 3 to day 7

7 (C) *Hoxc6* expression in MNs characterized by *Isl1* and *Tubb3* expression

8 from day 6 to day 8.

9 Scale bars = 40  $\mu$ m

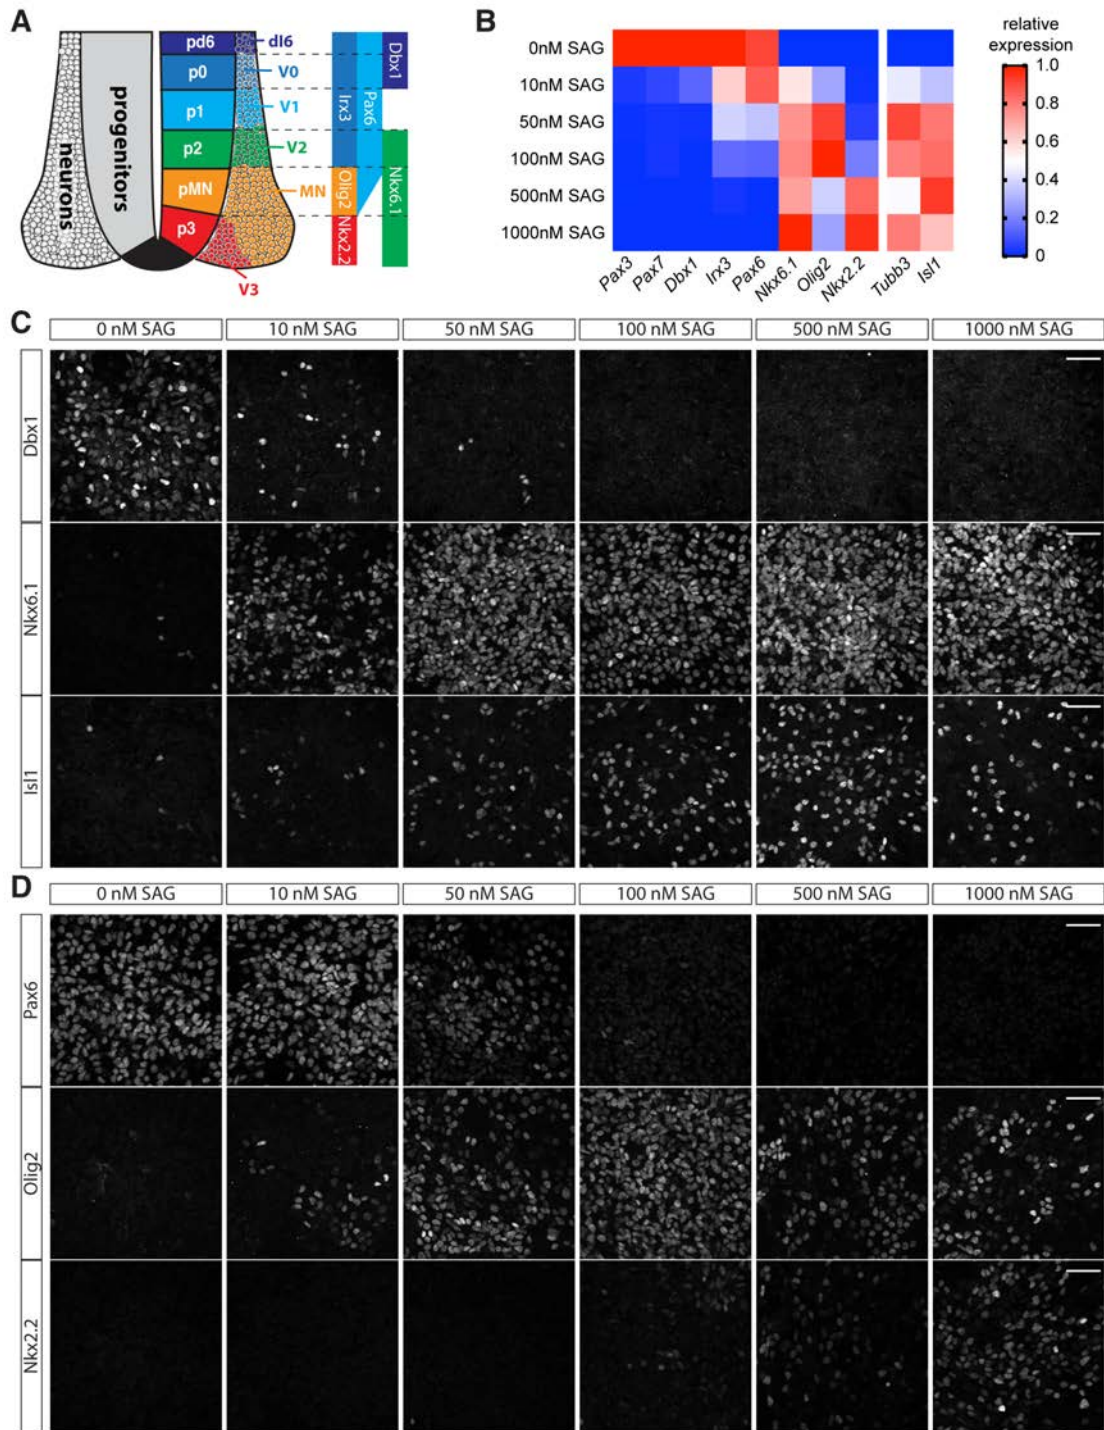

1

2

3 **Fig S2. Establishment of different NP identities by different levels of Shh**  
 4 **pathway activation**

5 (A) Schematic of the embryonic spinal cord. Expression domains of TFs  
 6 defining NP domains are indicated.

7 (B) RT-qPCR analysis of day 6 differentiations treated with 0-1000 nM SAG  
 8 after day 3.

- 1 (C) Expression of Dbx1, Nkx6.1 and Isl1 in day 6 differentiations treated with
- 2 the indicated concentrations of SAG
- 3 (D) Expression of Pax6, Olig2 and Nkx2.2 in day 6 differentiations treated with
- 4 the indicated concentrations of SAG
- 5 Scale bars = 40  $\mu$ m
- 6



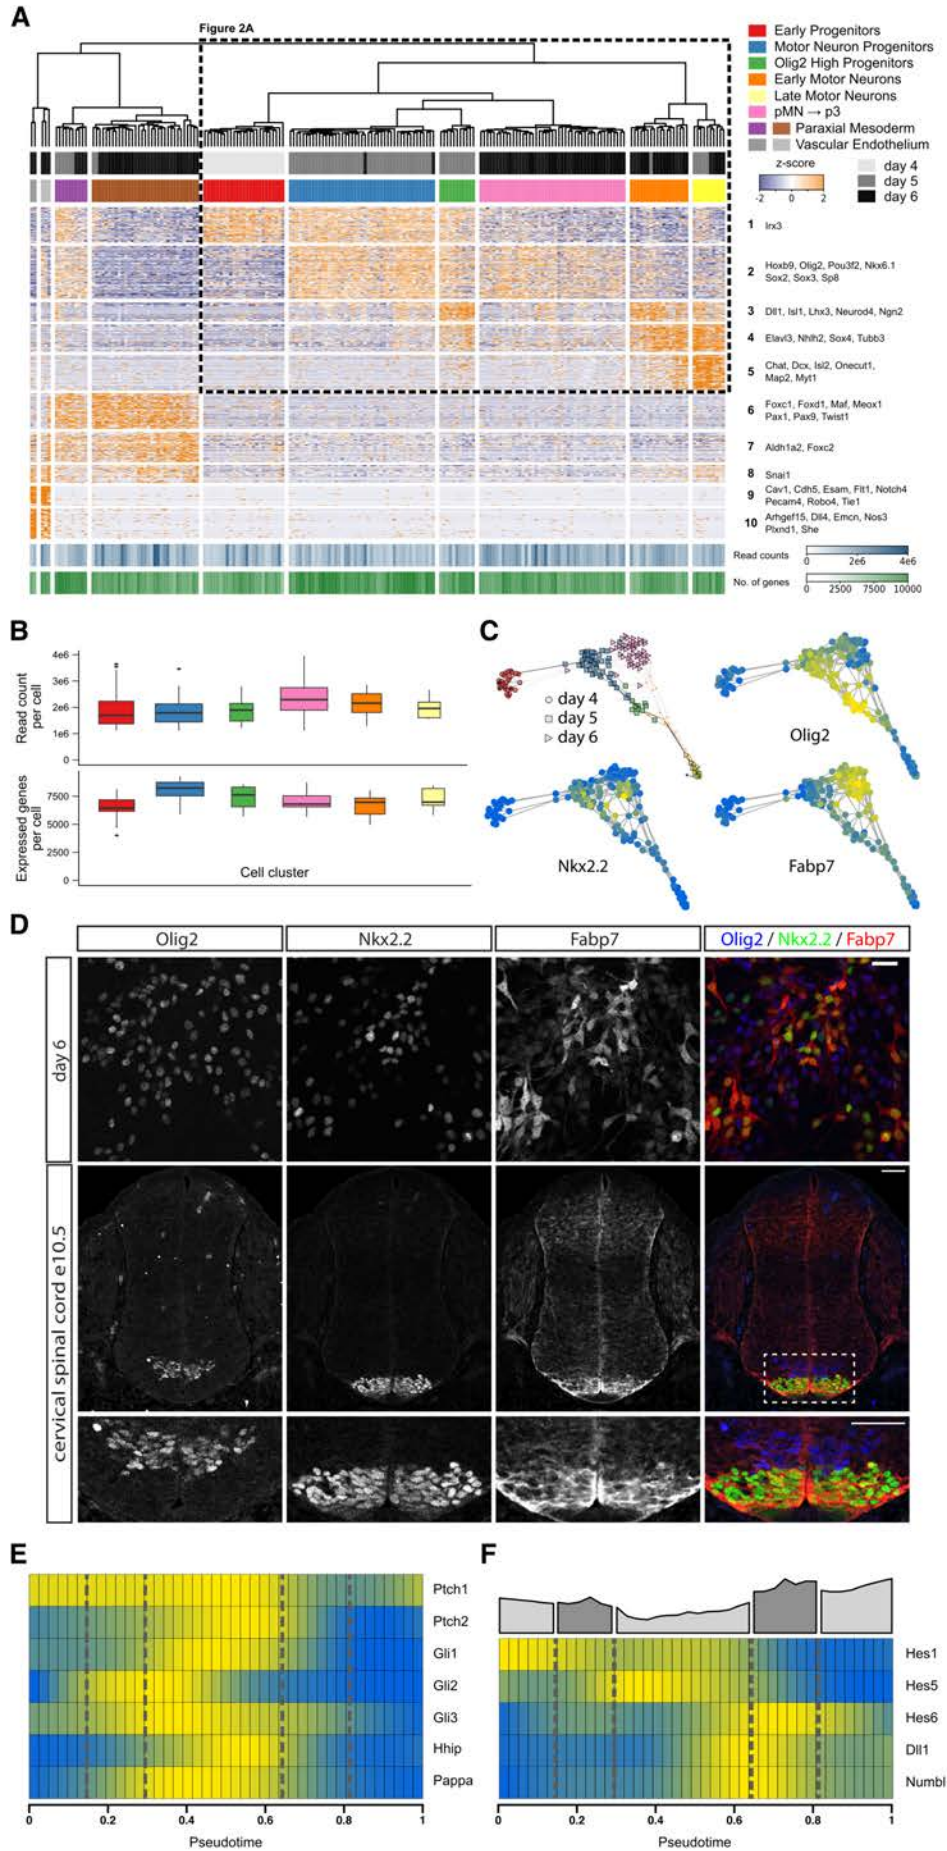

1

1 **Fig S3. Identification of gene modules and cell states by hierarchical**  
2 **clustering of single cell sequencing data**

3 (A) Identification of cell states by hierarchical clustering from 202 cells based  
4 on 10 identified gene modules. Genes characteristic for the individual  
5 modules are indicated. Boxed region corresponds to the heatmap in Fig 2A.

6 (B) Quantifications of read counts per cell (top) and number of expressed  
7 genes per cell (bottom) for neural cell states identified by hierarchical  
8 clustering. Colors of the graphs match cell states in Fig 2A and Fig S3A.

9 (C) Cell state graphs color coded for the expression levels of *Olig2*, *Nkx2.2*  
10 and *Fabp7*.

11 (D) Analysis of *Olig2*, *Nkx2.2* and *Fabp7* expression in differentiations at day  
12 6 (top row) and e10.5 embryonic spinal cords (bottom row) confirms higher  
13 *Fabp7* expression levels in p3 progenitors.

14 (E) The transition phase from early *Irx3* NPs to *Olig2* NPs correlates with the  
15 induction of Shh target genes *Ptch2*, *Gli1*, *Hhip*.

16 (F) Inhibition of Notch signalling, revealed by decreasing expression levels of  
17 *Hes1/5* and expression of the Notch ligand *Dll1* and the pathway inhibitors  
18 *Hes6* and *Numbl*, identifies the cell state transition from NPs to MNs.

19 Scale bars = 25  $\mu\text{m}$  (D, top row) and 50  $\mu\text{m}$  (D, bottom row).

20

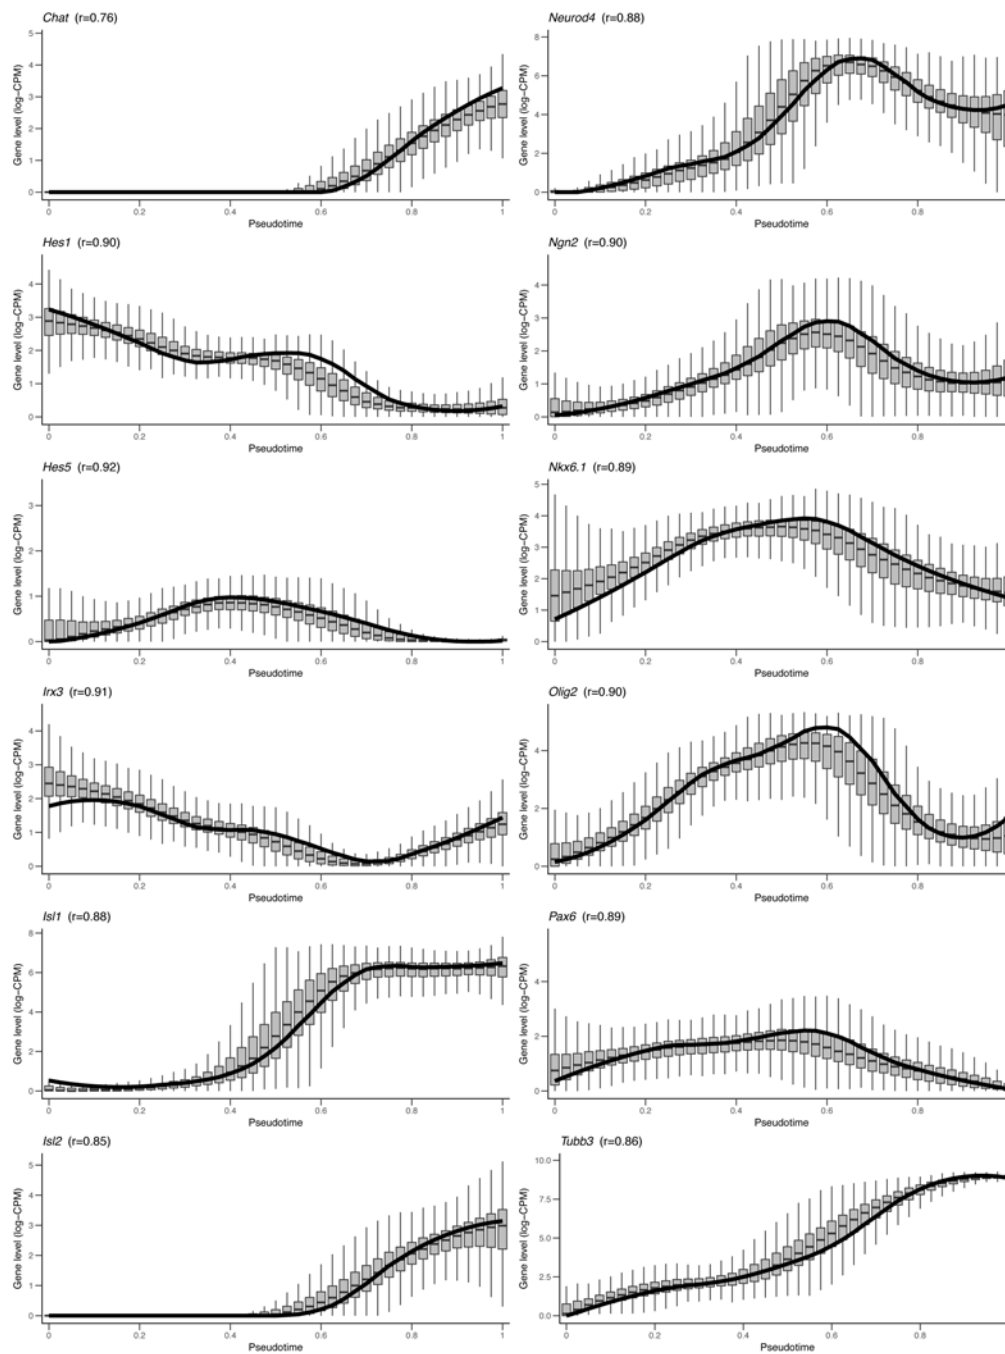

1

2

### 3 **Fig S4. Robustness analysis of gene expression dynamics by** 4 **bootstrapping**

5 Solid lines indicate original gene levels shown in Fig 2E,F and S3E,F. At each  
6 pseudotime point, box plots indicate median, first and third quartiles of the  
7 gene level distribution obtained from 1000 bootstrapped datasets. Whiskers  
8 indicate the largest and smallest values no further than 1.5 times the inter-  
9 quartile range taken from the hinge. The associated correlation coefficient,  $r$ ,  
10 is the average of the Spearman correlation coefficients over all pairs of  
11 bootstrap replicates.

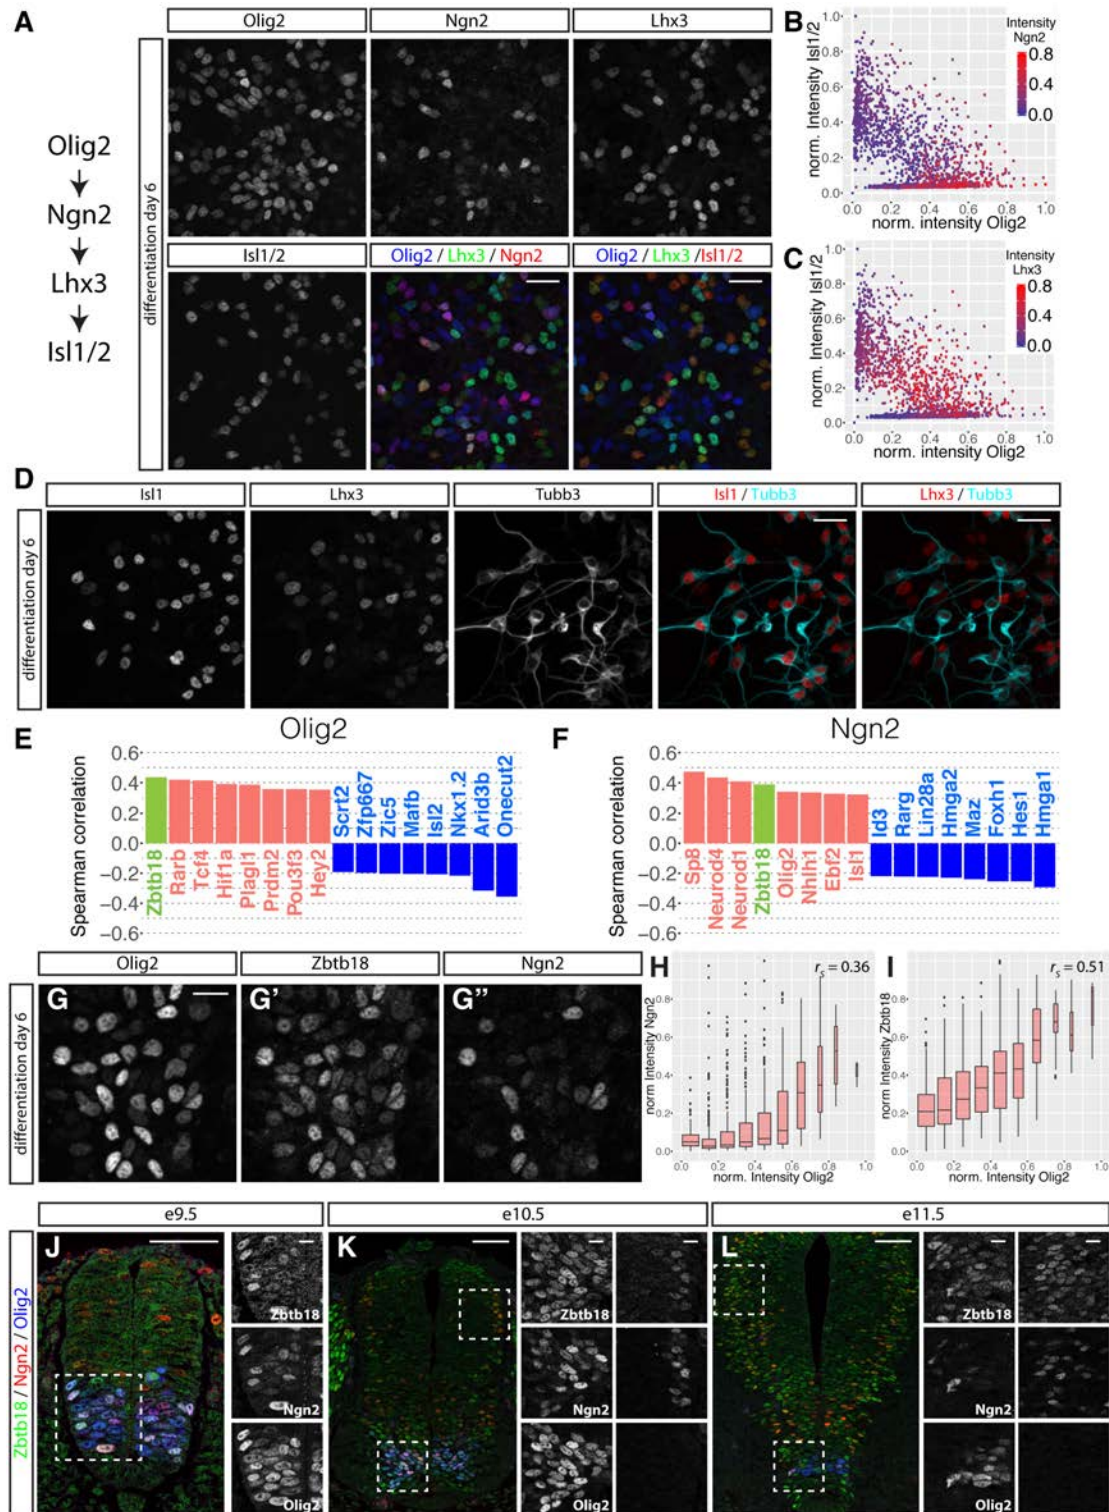

1

- 2 **Fig S5. Validation of predictions from the pseudo-temporal ordering**  
 3 (A) Sequential expression of Olig2, Ngn2, Lhx3 and Isl1 during MN  
 4 differentiation revealed by immunofluorescent staining for these markers at  
 5 day 6 of differentiation.  
 6 (B,C) Quantification of levels of Olig2, Isl1, Ngn2 (color code in B) and Lhx3  
 7 (color code in C) reveals a clear differentiation path from Olig2<sup>HIGH</sup> cells to

1 MNs and sequential induction of Ngn2 and Lhx3 during this process (n = 2236  
2 nuclei).

3 (D) Staining for Isl1, Lhx3 and Tubb3 reveals high levels of Tubb3 expression  
4 in Isl1-positive but not Lhx3-positive MNs at day 6 of differentiation. This is  
5 consistent with the earlier MN stage of Lhx3 MNs.

6 (E, F) Most positive and negative Spearman-correlated transcription factors  
7 for *Olig2* (E) and *Ngn2* (F) reveals *Zbtb18* (green in E-G) as a novel gene  
8 involved in MN formation.

9 (G-G'') Immunofluorescent staining for Olig2 (G), Zbtb18 (G'), and Ngn2 (G'')  
10 at day 6 of differentiation.

11 (H, I) Quantification of levels of Olig2, Ngn2 (H) and Zbtb18 (I) in individual  
12 nuclei reveals a good correlation between these markers (n = 1431 nuclei).

13 (J-L) Analysis of Olig2, Ngn2, and Zbtb18 expression in neural tubes at e9.5  
14 (J), e10.5 (K) and e11.5 (L). Note that Ngn2 and Zbtb18 are expressed in  
15 cells with high levels of Olig2 at e9.5 and e10.5, but not at e11.5 (left insets in  
16 K-M). In addition, Zbtb18 and Ngn2 are co-expressed in nuclei at the edge of  
17 the progenitor domain in dorsal areas of the neural tube at e10.5 (L) and  
18 e11.5 (M) (right insets).

19 Scale bars = 25  $\mu\text{m}$  in (A,D), 10  $\mu\text{m}$  in (G) and insets in J-L, 50  $\mu\text{m}$  in J-L  
20

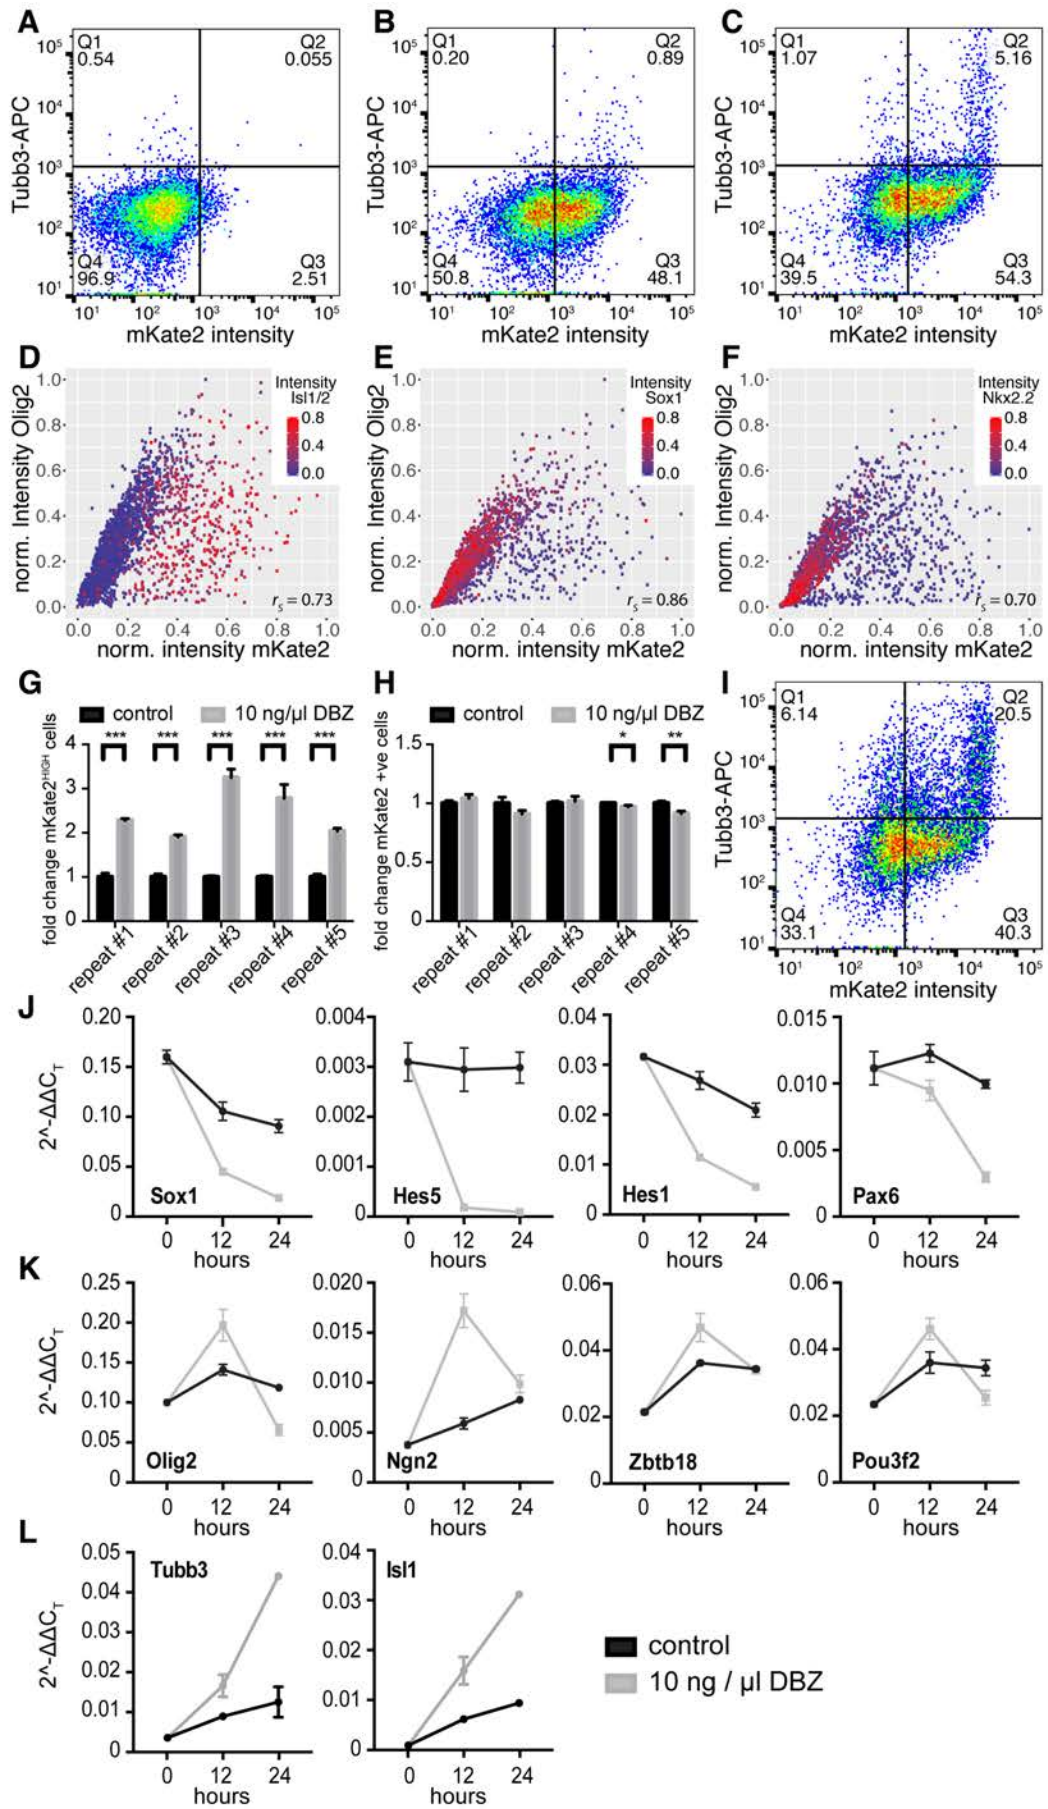

1  
2

1 **Fig S6. Characterization of the Olig2-mKate2 reporter cell line by flow**  
2 **cytometry and upon Notch inhibition**

3 (A-C) Quantification of mKate2 and Tubb3 fluorescence intensity by flow  
4 cytometry at day 4 to day 6 of differentiation. Note that high levels of Tubb3  
5 are predominantly detected in mKate2<sup>HIGH</sup> cells at day 6 (C).

6 (D-F) Correlation between Olig2 and mKate2 levels in individual nuclei  
7 quantified from images in Fig 4C-F. Plots are color coded for levels of *Isl1/2*  
8 (D), *Sox1* (E) and *Nkx2.2* (F).

9 (G) Quantification of the fold change in mKate2<sup>HIGH</sup> cells (see Fig 4L) upon 24  
10 hours Notch inhibition for five experimental repeats by flow cytometry . Each  
11 repeat consists of the measurement of three independent dishes for control  
12 and Notch inhibition from the same differentiation. \*\*\*  $p < 0.001$ , unpaired t-  
13 test

14 (H) Fold change of mKate2-positive cells (see Fig 4L) upon Notch inhibition  
15 (grey) relative to untreated control differentiations (black). Notch inhibition  
16 does not cause an overall change in the number of mKate2 positive cells. \*  $p$   
17  $< 0.05$ ; \*\*  $p < 0.01$ , unpaired t-test

18 (I) Quantification of mKate2 and Tubb3 fluorescence intensity by flow  
19 cytometry upon 24 hours Notch inhibition. Note that most mKate2<sup>HIGH</sup> cells  
20 differentiated into MNs (compare to Fig S6C).

21 (J-L) RT-qPCR quantification of expression levels of progenitor markers *Sox1*,  
22 *Hes5*, *Hes1* and *Pax6* (J), neurogenesis markers *Olig2*, *Ngn2*, *Zbtb18* and  
23 *Pou3f2* (K) and MN markers *Tubb3* and *Isl1* (L) after 0, 12 and 24 hours of  
24 Notch inhibition (grey) and in untreated controls (black). Note that *Olig2*  
25 expression increases in contrast to other progenitor markers after 12 hours of  
26 Notch inhibition.

27

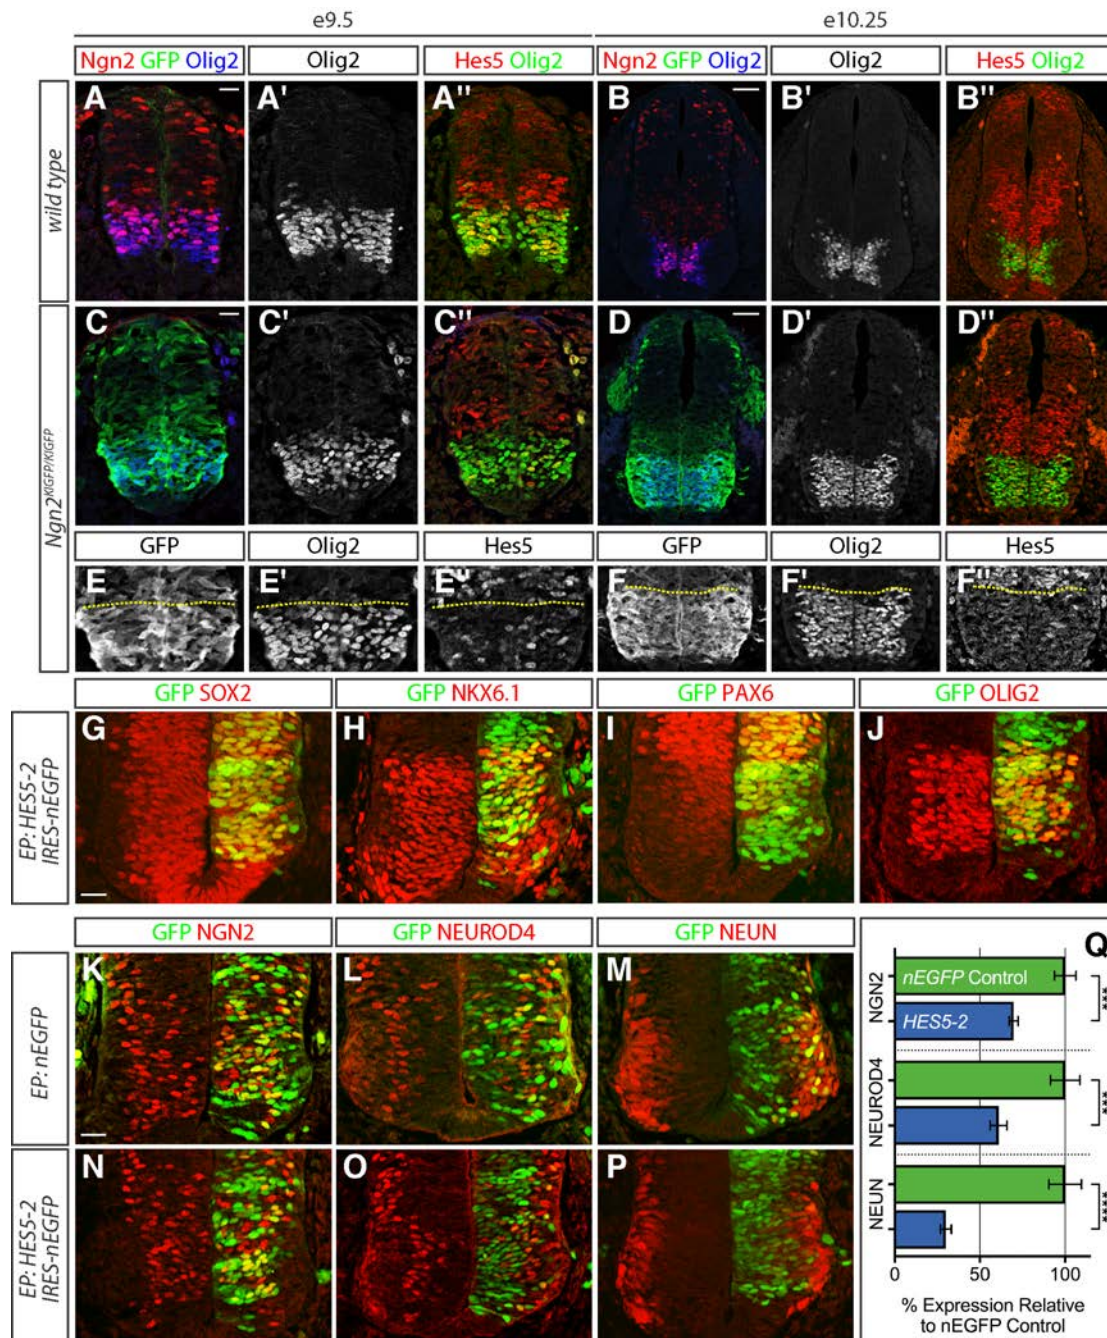

1

2

3 **Fig S7. Olig2, not Ngn2, is required for the repression of Hes5, which is**  
 4 **necessary for the formation of MNs**

5 (A-D'') Staining of wild type (A-B'') and *Ngn2*<sup>KIGFP</sup> mutant (C-D'') embryonic  
 6 spinal cords for Olig2, Ngn2, GFP and Hes5 at e9.5 (A,C) and e10.25 (B,D).

7 (E-F'') GFP expression (E,F) is still increased and Hes5 expression (E'',F'') is  
 8 still reduced in the pMN domain in *Ngn2*<sup>KIGFP</sup> mutant spinal cords (same  
 9 sections as C-D''). The yellow dotted line indicates the dorsal boundary of the  
 10 pMN domain.

11 (G-J) Ectopic expression of cHES5-2 does not affect levels of the progenitor  
 12 markers SOX2 (G), NKX6.1 (H), PAX6 (I) and OLIG2 (J).



1 (K-P) Ectopic expression of cHES5-2 (N-P) leads to a reduction of NGN2  
2 (K,N), NEUROD4 (L,O) and NEUN (M,P). (K-M) show control electroporations  
3 with a nuclear EGFP (nEGFP) expression construct.  
4 (Q) Quantification of the effect of ectopic cHES5-2 expression on expression  
5 levels of NGN2, NEUROD4 and NEUN relative to nEGFP controls. \*\*\*\* p <  
6 0.0001; \*\*\* p < 0.0005, Mann-Whitney test  
7 Scale bars = 20  $\mu\text{m}$  (A-A",C-C",G-P), 50  $\mu\text{m}$  (B-B",D-D").  
8

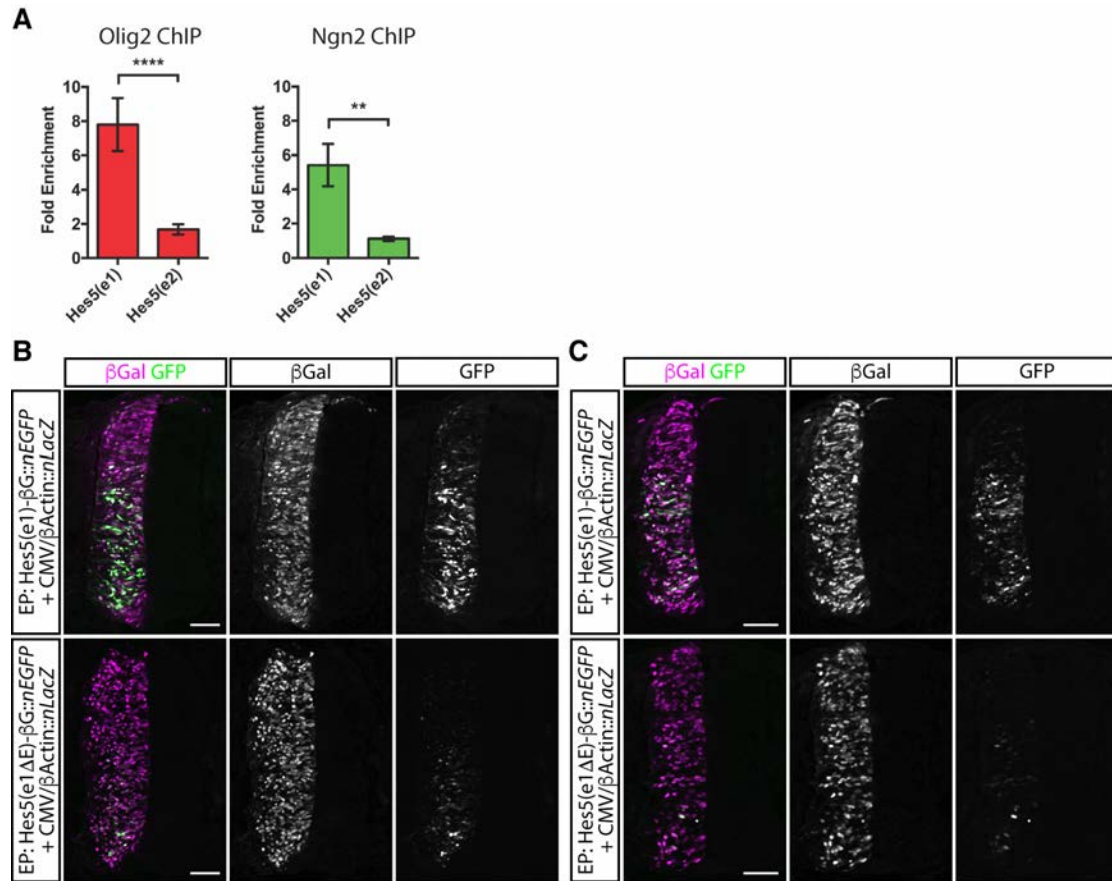

1  
2  
3  
4  
5  
6  
7  
8  
9  
10  
11  
12  
13  
14

**Fig S8. Olig2 and Ngn2 bind to Hes5(e1) in vivo**

(A) Both Olig2 and Ngn2 antibodies precipitate the *Hes5(e1)* genomic element from ESC-derived MN progenitors, but not *Hes5(e2)*, an unrelated genomic element 3' to the *Hes5* coding exons that also contains an E-box. Fold enrichment relative to normal rabbit sera or purified IgG is displayed. \*\*\*\*  $p < 0.0001$ ; \*\*  $p < 0.01$ , Mann-Whitney test.

(B,C) Comparison between Hes5(e1)- $\beta$ G::nEGFP (top row) and Hes5(e1ΔE)- $\beta$ G::nEGFP (bottom row) reporter activities. Sections were imaged using identical settings for each pair. The overall activity of the Hes5(e1ΔE)- $\beta$ G::nEGFP reporter is lower than that of the Hes5(e1)- $\beta$ G::nEGFP reporter.

Scale bars = 50  $\mu$ m

1 **Table S1: List of qPCR primers**

2

| <b>Gene</b>     | <b>Forward primer</b>    | <b>Reverse primer</b>    |
|-----------------|--------------------------|--------------------------|
| <i>Actin</i>    | TGGCTCCTAGCACCATGA       | CCACCGATCCACACAGAG       |
| <i>Dbx1</i>     | CTATTTCCAGCTTCCTCCA      | GCTTCTGGAACGTCTTCTCC     |
| <i>Hes1</i>     | GGCGAAGGGCAAGAATAAATG    | GTGCTTCACAGTCATTTCCAG    |
| <i>Hes5</i>     | CCAAGGAGAAAAACCGACTG     | AACTCCTGCTCCAGCAGCA      |
| <i>Hes5(e1)</i> | CTGCTTCTGAATGAATGAGGGCGG | AGCAGACGAGCCCTTTATTGCTCT |
| <i>Hes5(e2)</i> | AGATGGCTCAGCGTTAAGAG     | CCATGTGGTTGCTGGGATTTG    |
| <i>Hoxb1</i>    | AGAGGCTGGCTTACGAGAC      | GGTTGAGGCTTGCTTGAGG      |
| <i>Hoxb4</i>    | AGCACGGTAAACCCAATTACG    | CGCGTCAGGTAGCGATTGTAG    |
| <i>Hoxb6</i>    | AAGAGCGTGTTCGGAGAG       | TGAAATTCCTTCTCCAGCTC     |
| <i>Hoxb8</i>    | CAGCTCTTCCCTGGATG        | CACCTCATTCTCCGATTCTG     |
| <i>Hoxb9</i>    | TAATCAAAGAGCTGGCTACG     | CCCTGGTGAGGTACATATTG     |
| <i>Hoxc6</i>    | CAGGTAAAGGCAAAGGGATG     | ATAGGCGGTGGAATTGAGG      |
| <i>Hoxc9</i>    | AGCCGACAGAGACAGATTAC     | AATGCCAGTCCCAGAAGC       |
| <i>Irx3</i>     | GGAGAGTGGAACAGATCGCT     | CTGATAAGACCAGAGCAGCGT    |
| <i>Isl1</i>     | TATCAGGTTGTACGGGATCAAA   | CTACACAGCGGAAACACTCG     |
| <i>Ngn2</i>     | AACTGGAGTGCCTTGAGTC      | CGAGTCTCGTGTGTTGTCGT     |
| <i>Nkx2.2</i>   | CAGCCTCATCCGTCTCAC       | TCACCTCCATACCTTTCTCC     |
| <i>Nkx6.1</i>   | CCCGGAGTGATGCAGAGT       | GAACGTGGGTCTGGTGTGT      |
| <i>Pax3</i>     | AGTTCTATCAGCCGCATCC      | AATCAGGTTCAAGTCAATATCG   |
| <i>Pax6</i>     | ACCCGGCAGAAGATCGTAG      | TTTGCATCTGCATGGGTCT      |
| <i>Pax7</i>     | CATGAACCTGTGCAAGT        | CACTCGGGTTGCTAAGGATG     |
| <i>Pou3f2</i>   | AGCTTCCAATGCTCAAAGT      | GCAGTGCAAATTCTTGTTGGT    |
| <i>Sox1</i>     | AGCGTGCCTTTGATTTCTCT     | GGGATAAGACCTGGGTGAGA     |
| <i>Tubb3</i>    | CAACAGCACGGCCATCCAGG     | CTTGGGGCCCTGGGCTCCGA     |
| <i>Zbtb18</i>   | GTTCCGATAAAGTCGAGAGCC    | CCCTTTTGCTGGGTAGAATGT    |

3

4 **Supplementary file 1: Gene modules describing the biological processes**  
5 **represented in the scRNA-seq dataset**

6

7 **Supplementary file 2: GO annotations of the 22 gene modules (pval <**  
8 **0.05)**

9

## 1 SOURCE DATA LEGENDS

2

3 **Fig 1D,E - source data:** qPCR analysis displayed in Fig 1D,E

4 **Fig 2 and S3 – source data:** Gene expression data from scRNA-Seq and  
5 complementary information. Spreadsheet showing the transcriptome-wide  
6 normalized gene levels in counts per million (CPM) for all 202 cells contained in the  
7 day 4, day 5 and day 6 datasets, as well as along pseudotime (41 pseudotime  
8 points). In addition, the row indicates the cell clusters shown in Fig 2A,B and Fig  
9 S3A,B,C ('ep' for Early Progenitor, 'mnp' for Motor Neuron Progenitors, 'ohp' for Olig2  
10 High Progenitors, 'emn' for Early Motor Neurons, 'lmn' for Late Motor Neurons,  
11 'pmn\_p3' for the cells progressing from MN to p3 progenitors, 'pm\_1'/ 'pm\_2' for  
12 Paraxial Mesoderm and 've\_1'/ 've\_2' for Vascular Endothelium). The second and  
13 third row indicates the spatial coordinates of the cells displayed in the cell state  
14 graphs. The fourth row indicates the gene variation displayed in Fig 2E,F and Fig  
15 S3E,F.

16 **Fig 3E,F – source data:** Intensity measurements of Olig2, Mnx1 and Ngn2 in the  
17 pMN domain of spinal cords at e9.5 to generate plots in Figure 3C,D

18 **Fig 3G,H – source data:** Intensity measurements Olig2, Mnx1 and Ngn2 in the pMN  
19 domain of spinal cords at e10.5 to generate plots in Figure 3E,F

20 **Fig 4G,H and S6D – source data:** Intensity measurements of Olig2, mKate2 and  
21 Isl1/2 to generate plots in Fig 4G,H and Fig S6D

22 **Fig 4I and S6E – source data:** Intensity measurements of Olig2, mKate2 and Sox1  
23 to generate plots in Fig 4I and Fig S6E

24 **Fig 4J and S6F – source data:** Intensity measurements of Olig2, mKate2 and  
25 Nkx2.2 to generate plots in Fig 4J and Fig S6F

26 **Fig 6I – source data:** Quantification of Hes1, Hes5 and Ngn2 expression in *Olig2<sup>Cre</sup>*  
27 heterozygous and homozygous embryos

28 **Fig 8F – source data:** Analysis of the dorsal-ventral positions of individual cells  
29 expressing the Hes5(e1) and Hes5(e1ΔE) reporters relative to CMV/β-actin::nLacZ  
30 and Olig2

31 **Fig S1B – source data:** qPCR analysis displayed in Fig S1B

32 **Fig S2B – source data:** qPCR analysis displayed in Fig S2B

33 **Fig S5B – source data:** Intensity measurements of Olig2, Ngn2 and Isl1 to generate  
34 the plots shown in Fig S5B

35 **Fig S5C – source data:** Intensity measurements of Olig2, Lhx3 and Isl1 to generate  
36 the plots shown in Fig S5C

37 **Fig S5H,I – source data:** Intensity measurements of Olig2, Zbtb18 and Ngn2 to  
38 generate the plots shown in Fig S5H,I.

39 **Fig S6J,K,L – source data:** qPCR analysis displayed in Fig S6J,K,L

40 **Fig S7Q – source data:** Quantification of NGN2, NEUROD4 and NEUN expression  
41 in chick embryos electroporated with HES5-2-IRES-GFP or control GFP expression  
42 plasmid

43 **Fig S8A – source data:** ChiP-qPCR analysis of Olig2 binding to Hes5(e1)

44

45

## 1 ANALYTICAL SUPPLEMENT

2

### 3 RNA sequences alignment and pre-processing

4 Sequences were aligned to the Ensemble mouse genome GRCm38 using  
5 Tophat2 (Kim et al., 2013) and counted with HTSeq-count. Cell debris and  
6 doublets were removed from the data by inspecting microscope images of  
7 the microfluidic chips. Low-quality libraries were excluded from the 236  
8 sequenced single-cell transcriptomes if their transcript abundance was less  
9 than  $10^6$  reads and the number of expressed genes was less than one  
10 thousand. The 202 retained libraries (25 cells from day 4, 68 cells from day 5  
11 and 109 cells from day 6) were normalized to read counts per million (CPM).  
12 Genes with counts in less than 3 cells or annotated as pseudogenes were  
13 excluded from the analysis.

14

### 15 Cell state identification

16 To identify the cell states in the dataset, we applied a two-stage strategy  
17 aimed at selecting the gene modules demonstrating relevant and concerted  
18 patterns of expression. First, we took a data-driven approach to characterize  
19 the different modules of interacting genes. From the initial set of 13196  
20 expressed genes, we selected the 2287 genes that showed Spearman  
21 correlation ( $r > 0.4$ ) with at least two other genes. The correlated genes were  
22 grouped into 127 gene modules by performing a hierarchical clustering using  
23 the Euclidean distance of the z-scored log-transformed gene levels and  
24 Ward's agglomeration criterion (Ward, 1963). The number of modules was  
25 selected by determining the "elbow" position in the curve representing the  
26 total within-module gene level variation per number of modules. Gene  
27 modules were removed according to two criteria: insufficient number of cells  
28 expressing the comprised genes and inconsistent gene pattern in these cells.  
29 Both criteria were assessed by binarizing gene expression levels using an  
30 parameter-free adaptive thresholding method (R function `binarize.array` from  
31 the `ArrayBin` package). For each cell, we obtained an average expression  
32 level per module by averaging the z-scored log-transformed expression levels  
33 of all genes belonging to the module. Each of the 127 average expression  
34 level distributions were binarized independently. A cell was considered  
35 expressing a gene module if the associated Boolean value was true. Modules  
36 with fewer than four cells expressing it were excluded. The second criterion  
37 was designed to verify that cells expressing a gene module were showing  
38 consistently high levels over most of the genes composing the module. We  
39 binarized the z-scored log-transformed expression levels of all genes  
40 independently. Then, for each module, we calculated the ratio of Boolean  
41 values in cells expressing the module (as defined above). We excluded  
42 modules where less than half of these Boolean values were true. Twenty-two

1 modules comprising 1064 genes were retained.

2

3 Second, functional annotation of the gene modules revealed the global and  
4 unbiased description of the biological processes represented in the dataset  
5 (see Supplementary files 1 and 2 showing the genes modules and their  
6 associated GO terms). In particular, two cell cycle-related gene modules were  
7 excluded (Supplementary file 2): gene module 18 containing genes belong to  
8 cell cycle phases G2 and M, and primarily associated with the cell division GO  
9 term (GO:0051301); and gene module 20, containing G1 and S genes, and  
10 associated with the cell cycle GO term (GO:0007049). To focus on cell type  
11 characterization, we selected the 10 modules comprising the GO terms  
12 associated with embryonic development, i.e. nervous system development  
13 (GO:0007399), skeletal system development (GO:0001501), angiogenesis  
14 (GO:0001525), cell differentiation (GO:0030154).

15

### 16 **Cell population clustering**

17 In order to define the cell populations present in the dataset, we performed a  
18 hierarchical clustering (Ward's agglomeration criterion) of the Euclidean  
19 distances between cells using the z-scored log-transformed expression levels  
20 of the 545 genes included in the 10 selected modules (Fig 2A and Fig S3A).  
21 The 4 cell clusters containing vascular endothelial and mesodermal cells and  
22 the 5 associated gene modules were excluded from the subsequent analysis.  
23 5 gene modules and 306 genes were retained.

24

### 25 **Single-cell state graph**

26 To investigate the dynamical changes of the transcriptional profile as cells  
27 differentiate, we developed a method to relate each cell to its closest  
28 neighbours in expression space. Unlike cluster analysis which aims to  
29 partition cells into groups with similar characteristics, hence breaking the  
30 continuity of cell state differentiation, we set out to generate graphs that  
31 connect individual cells without requiring the definition of groups. These can  
32 reveal the differentiation trajectories and intermediate states that link the  
33 clusters of similar cells (the "clustered" populations).

34

35 Using the log-transformed expression levels in the 306 genes space, we first  
36 calculated the Euclidean distance matrix between each cell and hence  
37 constructed a complete weighted graph of cell similarity  $D$ . In (Trapnell et al.,  
38 2014, Camp et al., 2015), a minimum spanning tree (MST) algorithm was  
39 used to extract the subset of cell-cell edges, which forms the backbone of  
40 differentiation branches. While MSTs ensure that all cells are connected, they  
41 are also sensitive to noise, making the local structure sensitive to small  
42 changes in the data (Zemel and Carreira-Perpinan, 2005). To improve

1 robustness to noise of MSTs, we constructed a consensus graph which  
2 combines multiple perturbed minimum spanning trees (pMSTs). Each pMST  
3 is obtained by calculating a MST from the cell dissimilarity matrix  $D$  with a  
4 certain ratio  $j$  of its elements set to a very large value ( $j=20\%$ ), hence  
5 forbidding the recruitment of the associated edges. Individual pMSTs are  
6 merged by summing their adjacency matrices into a matrix storing the  
7 occurrences of each edge. We then exclude rarely used edges by clustering  
8 the non-null edge occurrence distribution using the Fisher method  
9 (Fisher,1958) and removing all edges belonging to the first class. This leaves  
10 edges that are used repeatedly in multiple permutations and therefore  
11 represent good choices for inclusion in MST graphs. The perturb-and-merge  
12 algorithm works iteratively until convergence in the number of included edges.  
13 The graph visualization shown in Fig 2B,C and Fig S3C were obtained by  
14 projecting the graph into 2D where the positions of each cell (node) in the  
15 graph were initially random and then adjusted using an iterative force-based  
16 layout algorithm, ForceAtlas2 (Jacomy et al., 2014). Gene expression patterns  
17 shown in Fig 2C and Fig S3C were smoothed by averaging each cell's log-  
18 transformed gene levels with its neighbors' log-transformed gene levels. We  
19 refer to these transformed levels as "log-smoothed" in the following.

20

### 21 **Pseudo-temporal ordering**

22 One of the advantages of generating a single-cell state graph is the possibility  
23 to infer a pseudo-temporal ordering of the gene expression by following the  
24 gene expression implied by the spanning tree. The strategy we used was to  
25 identify two terminal cell populations, early and late, and then find the  $K$ -  
26 shortest paths that connect each pair of early and late cells (Martins and  
27 Pascoal, 2003). The early population was specified by selecting the 3 cells  
28 expressing a combination of highest *Irx3* level and lowest *Tubb3* level, and  
29 the late population by selecting the 3 cells expressing the highest *Tubb3* level.  
30 A thousand  $k$ -shortest paths were generated for each of the 9 pairs of early  
31 and late cells. The resulting 9000 paths did not necessarily have the same  
32 length, 90.4% of them were formed by between 14 and 17 cells (shortest  
33 paths had 13 cells and longest 19 cells). In order to average gene expression  
34 along all paths, each of the 9000 paths was rescaled to the same length. Path  
35 rescaling was performed by replicating the cell IDs forming a path so that the  
36 total rescaled path length would match a constant value set to 41 pseudotime  
37 points (Fig 2D). As no path length was a factor of 41, some cell IDs were  
38 replicated either 2 or 3 times (13-cell-long paths being the exception with cell  
39 IDs replicated 3 or 4 times). For example, 16-cell-long paths had 7 cell IDs  
40 repeated 2 times, and 9 cell IDs repeated 3 times. To avoid the introduction of  
41 any bias in the repetitions, the choice of replicating a cell ID 2 or 3 times was  
42 random. The resulting 9000 equally-sized paths provided a list of 9000 cell

1 IDs for each of the 41 pseudotime points. These lists allowed the calculation  
2 of various measurements along the pseudotime scale. In particular, Fig 2E,F  
3 and Fig S3E,F show the mean value of the 9000 log-smoothed gene levels for  
4 each of the 41 time points. All the pseudo-temporal dynamics were smoothed  
5 using a local polynomial regression fit (R function loess with span=0.5).

6

### 7 **Robustness of pseudo-temporal ordering**

8 In order to assess the robustness of our pseudo-temporal orderings, we  
9 performed a bootstrapping of the predicted 13 gene expression profiles shown  
10 in Fig 2 with 1000 replicates. Following standard bootstrapping procedure  
11 (Booth et al., 1993), the cells of each bootstrapped dataset were drawn  
12 randomly with replacement. Hence the bootstrapped datasets were composed  
13 on average of about 97 different cells while maintaining the original sample  
14 size with cells selected multiple times (the expected number of cells selected

15 at least once in a bootstrapped dataset is given by  $N(1 - (\frac{N-1}{N})^N)$  (with N=154  
16 original cells). Following (Haghverdi et al., 2016), we constructed a (1000 by  
17 1000) "self-concordance" matrix for each gene, the elements of which are  
18 Spearman correlation of the expression profiles obtained between all pairs of  
19 replicates. Calculating the mean and standard deviation of these matrices  
20 reads: *Chat* (mean=0.76, sd=0.11), *Hes1* (mean=0.90, sd=0.05), *Hes5*  
21 (mean=0.92, sd=0.05), *Irx3* (mean=0.91, sd=0.07), *Isl1* (mean=0.88,  
22 sd=0.10), *Isl2* (mean=0.85, sd=0.13), *Lhx3* (mean=0.87, sd=0.12), *Neurod4*  
23 (mean=0.88, sd=0.11), *Neurog2* (mean=0.90, sd=0.08), *Nkx6.1* (mean=0.89,  
24 sd=0.08), *Olig2* (mean=0.90, sd=0.07), *Pax6* (mean=0.89, sd=0.06), *Tubb3*  
25 (mean=0.86, sd=0.09). The percentile confidence intervals for the gene  
26 expression profiles are shown in Fig S4.

27

### 28 **Gene variation and dynamical states**

29 Quantification of the metastable states and transition phases were obtained  
30 by calculating the global gene variation along pseudotime. To do so, we  
31 identified the 2466 genes with higher dispersion, i.e. higher ratio of variance  
32 over mean as described in (Satija et al., 2015), and with an average  
33 expression level higher than 10 CPM to avoid taking into account low-level  
34 gene's variation. The absolute value of the first derivative of these genes was  
35 averaged to define the gene variation (Fig 2D,E,F and Fig S3E,F).

36

37 After applying differentiation-and-smoothing twice to gene variation  
38 (smoothing with local polynomial regression fit), we obtained a profile showing  
39 positive values for periods of higher gene variation and negative values for  
40 periods of lower gene variation, hence defining the dynamical states along  
41 pseudotime. This operation is equivalent to applying a low-pass Savitzky-



1 Golay filter to the gene variation signal.

2

### 3 **References**

4

5 Booth, J.G., Hall, P., and Wood, A.T.A. (1993). Balanced Importance  
6 Resampling for the Bootstrap. *Ann. Stat.* 21, 286–298.

7

8 Camp, J. G., Badsha, F., Florio, M., Kanton, S., Gerber, T., Wilsch-  
9 Bräuninger, M., Lewitus, E., Sykes, A., Hevers, W., Lancaster, M., Knoblich,  
10 J. A., Lachmann, R., Pääbo, S., Huttner, W. B. and Treutlein, B. (2015).  
11 Human cerebral organoids recapitulate gene expression programs of fetal  
12 neocortex development. *Proceedings of the National Academy of Sciences of*  
13 *the United States of America* 112, 15672.

14

15 Fisher, W. (1958). On Grouping for Maximum Homogeneity. *Journal of the*  
16 *American Statistical Association* 53, 789-798.

17

18 Haghverdi, L., Büttner, M., Wolf, F.A., Buettner, F., and Theis, F.J. (2016).  
19 Diffusion pseudotime robustly reconstructs lineage branching. *Nat. Methods*  
20 13, 845–848.

21

22 Jacomy, M., Venturini, T., Heymann, S., Bastian, M., Diminescu, D., Batagelj,  
23 V., Mrvar, A., Davidson, R., Harel, D., Hu, Y., Kamada, T., Kawai, S., Noack,  
24 A., Newman, M., Krzywinski, M., Birol, I., Jones, S., Marra, M., Eades, P.,  
25 Fruchterman, T., Reingold, E., Kleinberg, J., Barnes, J., Hut, P. and  
26 Purchase, H. (2014). ForceAtlas2, a Continuous Graph Layout Algorithm for  
27 Handy Network Visualization Designed for the Gephi Software. *PLoS ONE* 9,  
28 e98679.

29

30 Kim, D., Perte, G., Trapnell, C., Pimentel, H., Kelley, R., Salzberg, S. L.,  
31 Mortazavi, A., Williams, B., McCue, K., Schaeffer, L., Wold, B., Pei, B., Sisu,  
32 C., Frankish, A., Howald, C., Habegger, L., Mu, X., Harte, R.,  
33 Balasubramanian, S., Tanzer, A., Diekhans, M., Reymond, A., Hubbard, T.,  
34 Harrow, J., Gerstein, M., Roberts, A., Trapnell, C., Donaghey, J., Rinn, J.,  
35 Pachter, L., Trapnell, C., Pachter, L., Salzberg, S., Wu, T., Nacu, S., Grant,  
36 G., Farkas, M., Pizarro, A., Lahens, N., Schug, J., Brunk, B., Stoeckert, C.,  
37 Hogenesch, J., Pierce, E., Dobin, A., Davis, C., Schlesinger, F., Drenkow, J.,  
38 Zaleski, C., Jha, S., Batut, P., Chaisson, M., Gingeras, T., Wang, K., Singh,  
39 D., Zeng, Z., Coleman, S., Huang, Y., Savich, G., He, X., Mieczkowski, P.,  
40 Grimm, S., Perou, C., MacLeod, J., Chiang, D., Prins, J., Liu, J., Zhang, Z.,  
41 Harrison, P., Liu, Y., Gerstein, M., Kalyana-Sundaram, S., Kumar-Sinha, C.,  
42 Shankar, S., Robinson, D., Wu, Y., Cao, X., Asangani, I., Kothari, V.,  
43 Prensner, J., Lonigro, R., Iyer, M., Barrette, T., Shanmugam, A.,

1 Dhanasekaran, S., Palanisamy, N., Chinnaiyan, A., Chen, R., Mias, G., Li  
2 Pook-Than, J., Jiang, L., Lam, H., Miriami, E., Karczewski, K., Hariharan, M.,  
3 Dewey, F., Cheng, Y., Clark, M., Im, H., Habegger, L., Balasubramanian, S.,  
4 O'Huallachain, M., Dudley, J., Hillenmeyer, S., Haraksingh, R., Sharon, D.,  
5 Euskirchen, G., Lacroute, P., Bettinger, K., Boyle, A., Kasowski, M., Grubert,  
6 F., Seki, S., Garcia, M., Whirl-Carrillo, M., Gallardo, M., Blasco, M., Xing, J.,  
7 Zhang, Y., Han, K., Salem, A., Sen, S., Hu, C., Zhou, Q., Kirkness, E., Levy,  
8 S., Batzer, M., Jorde, L., Levy, S., Sutton, G., Ng, P., Feuk, L., Halpern, A.,  
9 Walenz, B., Axelrod, N., Huang, J., Kirkness, E., Denisov, G., Lin, Y.,  
10 MacDonald, J., Pang, A., Shago, M., Stockwell, T., Tsiamouri, A., Bafna, V.,  
11 Bansal, V., Kravitz, S., Busam, D., Beeson, K., McIntosh, T., Remington, K.,  
12 Abril, J., Gill, J., Borman, J., Rogers, Y., Frazier, M., Scherer, S., Strausberg,  
13 R., Langmead, B., Salzberg, S., Kim, D., Salzberg, S., Langmead, B.,  
14 Trapnell, C., Pop, M., Salzberg, S., Griebel, T., Zacher, B., Ribeca, P.,  
15 Raineri, E., Lacroix, V., Guigo, R. and Sammeth, M. (2013). TopHat2:  
16 accurate alignment of transcriptomes in the presence of insertions, deletions  
17 and gene fusions. *Genome Biology* 14, R36.  
18  
19 Martins, E. and Pascoal, M. (2003). A new implementation of Yen's ranking  
20 loopless paths algorithm. *Quarterly Journal of the Belgian, French and Italian*  
21 *Operations Research Societies* 1, 121-133.  
22  
23 Satija, R., Farrell, J. A., Gennert, D., Schier, A. F. and Regev, A. (2015).  
24 Spatial reconstruction of single-cell gene expression data. *Nature*  
25 *Biotechnology* 33, 495-502.  
26  
27 Trapnell, C., Cacchiarelli, D., Grimsby, J., Pokharel, P., Li, S., Morse, M.,  
28 Lennon, N. J., Livak, K. J., Mikkelsen, T. S. and Rinn, J. The dynamics and  
29 regulators of cell fate decisions are revealed by pseudotemporal ordering of  
30 single cells. *Nature Biotechnology* 32, 381-386.  
31  
32 Ward, J. H. (1963). Hierarchical Grouping to Optimize an Objective Function.  
33 *Journal of the American Statistical Association* 58, 236-244.  
34  
35 Zemel, R. S. and Carreira-Perpinan, M. A. (2005). Proximity Graphs for  
36 Clustering and Manifold Learning. In *Advances in Neural Information*  
37 *Processing Systems* 17, (Saul, L. K., Weiss, Y. and Bottou, L., eds), pp. 225-  
38 232. MIT Press.  
39  
40
